# Supplementary material for: iTRAQ-Based Sperm Proteomic&nbsp;Analyses Reveals Candidate Proteins Affecting the Quality of Spermatozoa From Boar on Plateaus
Source: Research Square preprint supplement (doi:10.21203/rs.3.rs-102654/v1), 2020-11-06
Supplement: Supplementary file 1 [file b2898523d86eacf236d5f0da.xlsx]

## Sheet: string_interactions.tsv default
SUID	Betweenness unDir	Bridging unDir	Centroid unDir	Closeness unDir	Degree unDir	Eccentricity unDir	EigenVector unDir	name	Radiality unDir	selected	shared name	Stress unDir	Regulated-state
97	4529.53	41.9403	-167	0.00228311	26	0.166667	0.39319	Fn1	7.22093	FALSE	Fn1	15474	down
319	4249.98	112.864	-167	0.00224215	14	0.166667	0.14593	Cfl1	7.17442	FALSE	Cfl1	12634	up
130	3430.67	98.8681	-167	0.00203666	16	0.166667	0.144944	Eef1a1	6.91279	FALSE	Eef1a1	10064	up
198	3248.96	109.411	-167	0.00197239	14	0.142857	0.100867	Sod2	6.81977	FALSE	Sod2	11566	up
146	2887.08	116.519	-167	0.00189036	10	0.166667	0.0218012	Rab1	6.69186	FALSE	Rab1	7638	up
237	2427.41	71.1125	-167	0.00207039	15	0.166667	0.189048	Anxa2	6.9593	FALSE	Anxa2	8056	up
230	2391.32	49.7156	-167	0.00171233	12	0.166667	0.0102606	Capza3	6.37209	FALSE	Capza3	6586	down
316	2249.91	69.3803	-167	0.00162075	12	0.142857	0.00562714	Akap4	6.18023	FALSE	Akap4	6442	down
323	1899.83	74.6995	-167	0.00196464	10	0.166667	0.0674049	Prdx1	6.80814	FALSE	Prdx1	6096	up
175	1809.91	276.532	-167	0.00196078	6	0.2	0.0624226	Rap1a	6.80233	FALSE	Rap1a	4204	up
163	1794.49	73.3444	-167	0.00167785	8	0.166667	0.0124792	Rab25	6.30233	FALSE	Rab25	5296	up
98	1733.75	30.4812	-167	0.002079	19	0.166667	0.288739	Egf	6.97093	FALSE	Egf	7304	up
353	1730.52	401.004	-167	0.00184162	5	0.166667	0.0211775	Actrt1	6.61047	FALSE	Actrt1	4710	down
125	1707.95	61.6526	-167	0.002079	15	0.166667	0.27072	Apoe	6.97093	FALSE	Apoe	6782	up
377	1634.08	139.921	-167	0.00178253	6	0.166667	0.0190867	Baiap2	6.50581	FALSE	Baiap2	3706	up
85	1579.22	137.652	-167	0.0019305	9	0.166667	0.0639853	Canx	6.75581	FALSE	Canx	5516	up
95	1507.35	135.465	-167	0.00185529	8	0.166667	0.0370369	Rab6a	6.63372	FALSE	Rab6a	5700	up
114	1473.58	123.968	-167	0.00205339	11	0.166667	0.177482	Tlr2	6.93605	FALSE	Tlr2	7382	up
103	1458.83	34.6515	-167	0.00206186	17	0.166667	0.241789	Hsp90b1	6.94767	FALSE	Hsp90b1	5886	up
264	1391.94	84.6166	-167	0.0015873	7	0.142857	0.0099434	Spaca4	6.10465	FALSE	Spaca4	4222	down
265	1379.3	524.829	-167	0.00186916	5	0.166667	0.0831153	Alpl	6.65698	FALSE	Alpl	4426	down
234	1312	599.771	-167	0.00153846	3	0.142857	0.014599	Tuba4a	5.98837	FALSE	Tuba4a	3008	down
160	1250.33	120.367	-167	0.00185185	7	0.166667	0.0873836	Nras	6.62791	FALSE	Nras	3896	up
369	1241.01	58.7575	-167	0.00183824	8	0.166667	0.0500223	Lcp1	6.60465	FALSE	Lcp1	4468	down
274	1219.33	42.0436	-167	0.00180832	11	0.166667	0.0447136	Vdac2	6.55233	FALSE	Vdac2	4610	down
278	1207.34	46.0077	-167	0.00164204	10	0.142857	0.0181152	Cox5b	6.22674	FALSE	Cox5b	4300	up
220	1009.11	89.0189	-167	0.00197628	7	0.166667	0.0792813	Pebp1	6.82558	FALSE	Pebp1	2944	up
148	931.885	46.0857	-167	0.00194175	12	0.142857	0.200282	Cp	6.77326	FALSE	Cp	3930	down
226	929.111	34.7331	-167	0.00170068	10	0.142857	0.0490265	Ggh	6.34884	FALSE	Ggh	3320	up
109	845.573	37.2701	-167	0.00191571	9	0.166667	0.11599	Ezr	6.73256	FALSE	Ezr	3258	up
154	812.611	57.9152	-167	0.00192678	10	0.166667	0.0997181	Hspa1a	6.75	FALSE	Hspa1a	3886	up
285	810.387	57.0252	-167	0.00167504	9	0.142857	0.022396	Cycs	6.29651	FALSE	Cycs	3478	up
100	799.167	66.5972	-167	0.00142248	6	0.142857	0.00217563	Pdcd6ip	5.68023	FALSE	Pdcd6ip	1840	up
181	788.171	107.309	-167	0.00193798	8	0.166667	0.124878	Anpep	6.76744	FALSE	Anpep	3074	up
327	785.191	588.893	-167	0.00149701	2	0.166667	0.00621131	Pdcd10	5.88372	FALSE	Pdcd10	1438	up
190	780.654	212.906	-167	0.00146199	4	0.142857	0.00218949	Chmp1a	5.7907	FALSE	Chmp1a	1678	up
142	710.404	318.091	-167	0.0018018	4	0.142857	0.0362677	Cd2ap	6.5407	FALSE	Cd2ap	2268	up
336	703.696	171.633	-167	0.00168919	4	0.142857	0.0276598	Anxa11	6.32558	FALSE	Anxa11	1796	up
72	682.166	68.6324	-167	0.00185529	10	0.142857	0.0911956	Rpsa	6.63372	FALSE	Rpsa	2834	up
346	668.191	637.818	-167	0.00158479	3	0.142857	0.0123593	Htra2	6.09884	FALSE	Htra2	1538	up
290	664	531.2	-167	0.00131752	2	0.142857	0.00124173	Rab11fip1	5.35465	FALSE	Rab11fip1	2056	up
383	664	553.333	-167	0.00144509	2	0.142857	0.0021693	Dhrs7b	5.74419	FALSE	Dhrs7b	1476	down
84	662.038	42.7414	-167	0.00196078	10	0.166667	0.0860707	Pdia3	6.80233	FALSE	Pdia3	2878	up
397	648.743	164.935	-167	0.00141643	4	0.142857	0.00168523	Spata19	5.66279	FALSE	Spata19	1716	down
122	639.079	22.8146	-167	0.00182482	11	0.142857	0.198433	Apoa1	6.5814	FALSE	Apoa1	2750	up
279	614.8	156.415	-167	0.00144509	5	0.125	0.00517002	Cox6b2	5.74419	FALSE	Cox6b2	1772	up
128	607.142	76.8072	-167	0.00144718	4	0.142857	0.00941839	Muc20	5.75	FALSE	Muc20	1618	up
120	595.296	50.5917	-167	0.00172117	8	0.142857	0.046176	Ubb	6.38953	FALSE	Ubb	1808	up
123	580.979	32.3531	-167	0.00183486	11	0.142857	0.222651	Kng1	6.59884	FALSE	Kng1	3270	up
201	572.38	135.94	-167	0.00172117	4	0.166667	0.0319267	Clta	6.38953	FALSE	Clta	1684	up
325	534.376	39.3073	-167	0.00179533	9	0.166667	0.170652	Serpine2	6.52907	FALSE	Serpine2	2868	up
183	522.488	51.9712	-167	0.00184502	8	0.166667	0.0828228	Hspa1l	6.61628	FALSE	Hspa1l	1962	up
101	519.209	103.842	-167	0.00125156	4	0.125	0.000481928	Chmp4b	5.12209	FALSE	Chmp4b	1102	up
115	497.986	83.7591	-167	0.00170068	6	0.142857	0.0477604	Tollip	6.34884	FALSE	Tollip	1664	up
342	486.002	118.675	-167	0.0015456	5	0.142857	0.0055165	Fscn3	6.00581	FALSE	Fscn3	1598	down
328	476.091	238.045	-167	0.00121655	2	0.142857	0.000618097	Serpini1	4.98837	FALSE	Serpini1	882	up
197	423.272	59.7305	-167	0.00175747	7	0.142857	0.0459847	Gpx4	6.4593	FALSE	Gpx4	1880	down
466	407.965	61.5303	-167	0.0015625	4	0.142857	0.0485841	Acat1	6.04651	FALSE	Acat1	1250	up
78	378.915	20.299	-167	0.00140845	8	0.142857	0.00477475	Ndufa6	5.63953	FALSE	Ndufa6	1186	up
320	368.791	68.355	-167	0.00186567	6	0.166667	0.0456812	Arhgdia	6.65116	FALSE	Arhgdia	1380	up
296	344.502	51.3707	-167	0.00179211	5	0.166667	0.0929911	Dpp4	6.52326	FALSE	Dpp4	864	up
112	343.819	24.7444	-167	0.00182149	9	0.166667	0.145848	Krt19	6.57558	FALSE	Krt19	1264	up
269	339.67	91.7705	-167	0.0014881	3	0.142857	0.0308467	Gng5	5.86047	FALSE	Gng5	1522	up
194	334	111.333	-167	0.00116686	2	0.125	0.000215834	Gnpat	4.78488	FALSE	Gnpat	740	down
291	334	111.333	-167	0.00108225	2	0.125	0.000123545	Ehd1	4.39535	FALSE	Ehd1	1030	up
584	334	151.818	-167	0.00148368	2	0.142857	0.00670641	Cbr1	5.84884	FALSE	Cbr1	860	up
136	334	66.8	-167	0.00123001	3	0.125	0.001613	Cep135	5.0407	FALSE	Cep135	758	down
137	334	66.8	-167	0.00123001	3	0.125	0.001613	Cep76	5.0407	FALSE	Cep76	758	down
358	334	75.4194	-167	0.0012987	3	0.125	0.00119913	Armc12	5.2907	FALSE	Armc12	782	down
227	334	43.5652	-167	0.00159744	5	0.142857	0.0316026	Gla	6.12791	FALSE	Gla	878	down
208	326.136	52.1223	-167	0.00167785	6	0.142857	0.0268157	Gstm5	6.30233	FALSE	Gstm5	1302	down
363	296.99	212.481	-167	0.00155763	3	0.142857	0.00802171	Mtch2	6.03488	FALSE	Mtch2	874	down
338	279.389	41.4482	-167	0.00160256	6	0.142857	0.0204997	Tfam	6.13953	FALSE	Tfam	820	down
414	261.253	130.626	-167	0.00149254	3	0.142857	0.00608534	Pef1	5.87209	FALSE	Pef1	696	up
117	252.633	19.5763	-167	0.00196464	12	0.166667	0.264344	Timp1	6.80814	FALSE	Timp1	1824	up
273	248.148	150.163	-167	0.0016	4	0.166667	0.0147015	Slc25a3	6.13372	FALSE	Slc25a3	804	down
294	246.479	29.6071	-167	0.00163934	6	0.142857	0.0292768	Hnrnpk	6.22093	FALSE	Hnrnpk	802	up
106	234.523	46.7746	-167	0.00172712	5	0.166667	0.0169524	Arf1	6.40116	FALSE	Arf1	772	up
474	204.823	136.549	-167	0.00104493	2	0.111111	4.85566e-05	Scamp2	4.20349	FALSE	Scamp2	382	down
200	202.276	138.703	-167	0.0015748	3	0.166667	0.0211893	Snx5	6.07558	FALSE	Snx5	1000	up
119	191.638	49.1379	-167	0.00152439	4	0.125	0.0142239	Ube2n	5.95349	FALSE	Ube2n	660	up
357	187.708	111.826	-167	0.00140252	3	0.142857	0.00210882	Prr30	5.62209	FALSE	Prr30	482	down
442	186.091	93.0453	-167	0.00103093	2	0.125	6.19732e-05	Mllt11	4.12791	FALSE	Mllt11	346	down
75	185.58	13.9496	-167	0.00168919	10	0.142857	0.0617823	Rps14	6.32558	FALSE	Rps14	938	up
140	177.331	34.3221	-167	0.00164745	5	0.142857	0.0317969	Cyb5r3	6.23837	FALSE	Cyb5r3	520	down
127	168.7	61.3455	-167	0.0013624	3	0.142857	0.0057813	Muc5b	5.5	FALSE	Muc5b	402	up
73	159.715	6.03837	-167	0.00164204	12	0.142857	0.0620818	Rps3	6.22674	FALSE	Rps3	800	up
607	159.089	106.059	-167	0.00134228	2	0.125	0.00277333	Xpo7	5.43605	FALSE	Xpo7	428	down
588	157.632	210.176	-167	0.00149031	2	0.142857	0.00509467	Lyzl1	5.86628	FALSE	Lyzl1	728	up
77	156.355	19.029	-167	0.00133156	6	0.125	0.00537694	Ndufa5	5.40116	FALSE	Ndufa5	870	up
333	124.722	9.46061	-167	0.0013459	7	0.125	0.0017783	Odf1	5.44767	FALSE	Odf1	482	down
139	116.893	194.821	-167	0.00154321	2	0.142857	0.00528094	Cyb5b	6	FALSE	Cyb5b	274	down
153	97.6946	45.7523	-167	0.00163399	4	0.142857	0.0432101	St13	6.2093	FALSE	St13	436	up
293	77.3694	42.2015	-167	0.00158983	4	0.125	0.033879	Syncrip	6.11047	FALSE	Syncrip	342	up
276	77.3247	25.1075	-167	0.00171527	4	0.142857	0.0408396	Ppib	6.37791	FALSE	Ppib	254	up
404	76.7986	162.632	-167	0.00152439	2	0.166667	0.0180437	Prss8	5.95349	FALSE	Prss8	668	up
271	76.6483	7.84795	-167	0.00162338	8	0.142857	0.0503733	Eif5a	6.18605	FALSE	Eif5a	334	up
334	68.631	14.8201	-167	0.00132275	5	0.125	0.00121212	Tcp11	5.37209	FALSE	Tcp11	250	down
650	59.2024	64.0025	-167	0.00165289	3	0.142857	0.031338	Cpox	6.25	FALSE	Cpox	274	down
407	51.0635	13.2797	-167	0.0013947	5	0.125	0.00237232	Spata3	5.59884	FALSE	Spata3	312	down
216	50.5449	117.938	-167	0.00169492	2	0.166667	0.0229881	Ranbp9	6.33721	FALSE	Ranbp9	320	down
441	48.0136	24.0068	-167	0.000944287	2	0.111111	1.08903e-05	Fam71d	3.61047	FALSE	Fam71d	76	down
418	40.9377	132.26	-167	0.00167504	2	0.142857	0.0204951	Nme2	6.29651	FALSE	Nme2	186	up
133	35.795	11.0139	-167	0.00153374	5	0.142857	0.0290933	Eif4g1	5.97674	FALSE	Eif4g1	280	up
81	35.0278	4.32442	-167	0.00163132	8	0.142857	0.0522094	Rpl31	6.20349	FALSE	Rpl31	212	up
608	33.7619	25.3214	-167	0.00120627	2	0.125	0.000487614	Arrdc1	4.94767	FALSE	Arrdc1	70	up
167	28.781	5.82747	-167	0.0018018	8	0.166667	0.197945	Vtn	6.5407	FALSE	Vtn	296	down
391	28.7089	51.676	-167	0.00154083	2	0.166667	0.0133089	Inadl	5.99419	FALSE	Inadl	80	up
132	27.0606	8.83611	-167	0.0015528	5	0.142857	0.0322364	Eif4h	6.02326	FALSE	Eif4h	178	up
344	23.6296	37.3098	-167	0.00157978	2	0.142857	0.0226505	Bsg	6.08721	FALSE	Bsg	62	up
244	22.9717	8.70769	-167	0.00151515	4	0.142857	0.0133154	Gsta2	5.93023	FALSE	Gsta2	190	up
256	22.9717	8.70769	-167	0.00151515	4	0.142857	0.0133154	Gsto2	5.93023	FALSE	Gsto2	190	down
434	22.4532	49.6333	-167	0.00134771	2	0.142857	0.00118617	Hspb9	5.45349	FALSE	Hspb9	124	down
554	22.4532	49.6333	-167	0.00134771	2	0.142857	0.00118617	Spata20	5.45349	FALSE	Spata20	124	down
105	18.5896	25.3494	-167	0.00147929	2	0.166667	0.00355088	Iqsec2	5.83721	FALSE	Iqsec2	36	down
206	14.5637	9.39594	-167	0.00150602	3	0.142857	0.00365363	Klc4	5.90698	FALSE	Klc4	76	up
144	14.1486	4.02647	-167	0.00137931	5	0.125	0.00550114	Cox7a2	5.55233	FALSE	Cox7a2	92	up
372	12.6582	10.4244	-167	0.00156006	3	0.125	0.0315908	Ccs	6.0407	FALSE	Ccs	64	down
288	11.5746	2.77236	-167	0.0015456	6	0.142857	0.0394591	Eif6	6.00581	FALSE	Eif6	112	down
514	11.4331	15.8304	-167	0.001443	2	0.142857	0.0191571	Ivd	5.73837	FALSE	Ivd	64	up
507	10.6485	4.0193	-167	0.00156006	4	0.142857	0.0194763	Sco2	6.0407	FALSE	Sco2	58	down
94	9.92994	6.11073	-167	0.00148148	3	0.142857	0.00502014	Bicd2	5.84302	FALSE	Bicd2	50	down
302	8.33333	1.27273	-167	0.00128535	5	0.125	0.00094815	Akap3	5.24419	FALSE	Akap3	22	down
572	8.01515	4.58009	-167	0.00154799	4	0.142857	0.0282457	Ruvbl1	6.01163	FALSE	Ruvbl1	30	down
89	7.7627	2.99215	-167	0.00174825	5	0.142857	0.109283	Krt8	6.44186	FALSE	Krt8	44	up
203	4.31658	2.29333	-167	0.00171233	5	0.166667	0.131986	Cfd	6.37209	FALSE	Cfd	64	up
213	2.71284	2.72736	-167	0.00174216	4	0.142857	0.113414	Agrn	6.43023	FALSE	Agrn	20	up
492	2.22222	3.80952	-167	0.00130719	2	0.125	0.00249026	mt-Atp8	5.31977	FALSE	mt-Atp8	8	down
301	1.66667	0.510204	-167	0.00128041	4	0.125	0.000839262	Cabyr	5.22674	FALSE	Cabyr	4	up
195	0	0	-167	0.000976562	1	0.111111	2.12658e-05	Acot3	3.81395	FALSE	Acot3	0	up
240	0	0	-167	0.0013245	1	0.125	0.00483051	Cstb	5.37791	FALSE	Cstb	0	up
297	0	0	-167	0.00137931	1	0.142857	0.00916228	Ada	5.55233	FALSE	Ada	0	down
310	0	0	-167	0.00091659	1	0.111111	1.21728e-05	Ehd4	3.42442	FALSE	Ehd4	0	up
361	0	0	-167	0.00165289	1	0.142857	0.0387404	Tgfbi	6.25	FALSE	Tgfbi	0	up
410	0	0	-167	0.0011919	1	0.125	0.00303928	Rras	4.88953	FALSE	Rras	0	up
423	0	0	-167	0.0011655	1	0.125	0.00092798	Pcdh1	4.77907	FALSE	Pcdh1	0	up
450	0	0	-167	0.00106724	1	0.111111	0.000118148	Irgc1	4.31977	FALSE	Irgc1	0	down
465	0	0	-167	0.00123916	1	0.125	0.00478692	Lss	5.07558	FALSE	Lss	0	down
479	0	0	-167	0.00148588	1	0.142857	0.00781147	Cpvl	5.85465	FALSE	Cpvl	0	down
488	0	0	-167	0.00102041	1	0.111111	0.000158927	Lrrcc1	4.06977	FALSE	Lrrcc1	0	down
495	0	0	-167	0.00128866	1	0.125	0.00178486	Mic13	5.25581	FALSE	Mic13	0	up
528	0	0	-167	0.00138889	1	0.142857	0.00440557	Mcu	5.5814	FALSE	Mcu	0	down
533	0	0	-167	0.00140647	1	0.142857	0.00492863	Arpc5l	5.63372	FALSE	Arpc5l	0	up
539	0	0	-167	0.00147929	1	0.142857	0.00664131	Clic1	5.83721	FALSE	Clic1	0	up
544	0	0	-167	0.00126103	1	0.125	0.00311375	Glb1l2	5.15698	FALSE	Glb1l2	0	down
568	0	0	-167	0.00102041	1	0.111111	0.000158927	Ccdc135	4.06977	FALSE	Ccdc135	0	down
585	0	0	-167	0.00118906	1	0.125	0.000660773	Dopey2	4.87791	FALSE	Dopey2	0	up
602	0	0	-167	0.0013986	1	0.125	0.0195513	Fabp3	5.61047	FALSE	Fabp3	0	up
627	0	0	-167	0.00125471	1	0.125	0.000979708	Adam1a	5.13372	FALSE	Adam1a	0	down
641	0	0	-167	0.00145138	1	0.142857	0.0114284	Chp1	5.76163	FALSE	Chp1	0	up
659	0	0	0	1	1	1	0	Reep6	0.0523256	FALSE	Reep6	0	up
660	0	0	0	1	1	1	0	Letm2	0.0523256	FALSE	Letm2	0	down
664	0	0	0	1	1	1	0	Ces5a	0.0523256	FALSE	Ces5a	0	down
665	0	0	0	1	1	1	0	Lcn5	0.0523256	FALSE	Lcn5	0	up
670	0	0	-167	0.00131062	1	0.142857	0.00122956	Exoc8	5.3314	FALSE	Exoc8	0	up
110	0	0	-167	0.00156986	2	0.142857	0.0398774	Slc9a3r1	6.06395	FALSE	Slc9a3r1	0	up
151	0	0	-167	0.00121065	2	0.125	0.0014976	B3gnt3	4.96512	FALSE	B3gnt3	0	up
304	0	0	-167	0.00137363	2	0.125	0.00595111	Usp5	5.53488	FALSE	Usp5	0	down
370	0	0	-167	0.00145138	2	0.142857	0.00781323	Scin	5.76163	FALSE	Scin	0	up
448	0	0	-167	0.00147493	2	0.142857	0.00309755	H2afb1	5.82558	FALSE	H2afb1	0	down
470	0	0	-167	0.0011534	2	0.125	0.00100023	Acot13	4.72674	FALSE	Acot13	0	up
501	0	0	-167	0.00133333	2	0.142857	0.00112146	Efhb	5.40698	FALSE	Efhb	0	down
509	0	0	-167	0.00127714	2	0.125	0.000647854	Tekt5	5.21512	FALSE	Tekt5	0	down
518	0	0	-167	0.00133333	2	0.142857	0.00112146	Ssmem1	5.40698	FALSE	Ssmem1	0	down
520	0	0	-167	0.00162338	2	0.142857	0.0323035	Ppic	6.18605	FALSE	Ppic	0	up
524	0	0	-167	0.00141643	2	0.125	0.0414888	Ica	5.66279	FALSE	Ica	0	down
594	0	0	-167	0.00169492	2	0.166667	0.0162589	Ppp1r9b	6.33721	FALSE	Ppp1r9b	0	down
87	0	0	-167	0.00130208	3	0.125	0.0027851	Ndufv3	5.30233	FALSE	Ndufv3	0	up
158	0	0	-167	0.00155039	3	0.142857	0.00702679	Rab2b	6.01744	FALSE	Rab2b	0	down
169	0	0	-167	0.00124378	3	0.125	0.000477573	Chmp1b	5.09302	FALSE	Chmp1b	0	up
315	0	0	-167	0.00127877	3	0.125	0.000730545	Fsip2	5.22093	FALSE	Fsip2	0	down
355	0	0	-167	0.0015949	3	0.142857	0.0418086	Dnaja3	6.12209	FALSE	Dnaja3	0	up
90	0	0	-167	0.0016835	4	0.142857	0.0923272	Krt18	6.31395	FALSE	Krt18	0	up
