# Supplementary material for: iTRAQ-Based Sperm Proteomic&nbsp;Analyses Reveals Candidate Proteins Affecting the Quality of Spermatozoa From Boar on Plateaus
Source: Research Square preprint supplement (doi:10.21203/rs.3.rs-102654/v1), 2020-11-06
Supplement: Supplementary file 2 [file d3c061bcdfe4fdeac1f46fe3.xlsx]

## Sheet: 总蛋白定量列表
Accession Number	YP1	YP2	TP1	TP2	Pvalue	Mean(TP/YP)	YP-count	TP-count	ref	YP-ref	TP-ref	log2Ratio(TP/YP)	Significant
YP_004021579.1 (+4)	14462.2	10369.1	75804.7	48308.9	0.0153247	5.13788	41078.1	62056.8	37236.2	1.10318	1.66657	0.59522	up
NP_999015.2	73222.5	78478	316095	301124	7.44972e-05	4.07356	124286	308610	192230	0.646548	1.60542	1.31212	up
XP_020952401.1 (+2)	87682.4	97289.7	305328	290867	0.000240924	3.23188	105121	298097	195292	0.538277	1.52642	1.50373	up
XP_020951286.1	83529.6	59888.9	204253	234625	0.00709571	3.1456	97499.2	219439	145574	0.669755	1.5074	1.17036	up
NP_001090943.1 (+1)	96617.7	207105	338783	466010	0.0621734	3.05389	128051	402396	277129	0.462063	1.45202	1.6519	up
NP_999017.1	96617.7	94629.3	246290	334118	0.00462724	3.03519	160362	290204	192914	0.83126	1.50432	0.85574	up
NP_001090955.1	126607	303219	422913	627824	0.0896454	2.94111	143925	525368	370141	0.38884	1.41937	1.86801	up
XP_003131485.1	168221	171756	437827	550354	0.00216879	2.90692	207460	494090	332039	0.624806	1.48805	1.25194	up
NP_999607.1	172951	225068	602249	509951	0.00546695	2.84309	227301	556100	377555	0.602034	1.4729	1.29074	up
XP_013850255.1	56658.3	52498.9	148489	156956	0.000165961	2.80228	79990	152723	103651	0.771727	1.47344	0.933023	up
XP_003134450.6	209996	290867	585780	778318	0.0141222	2.7964	256337	682049	466240	0.549795	1.46287	1.41184	up
XP_005661599.2 (+1)	62000.8	63743.9	158048	181549	0.000588605	2.7012	78845.5	169798	116335	0.677743	1.45956	1.10672	up
NP_001153087.1	42055.3	41189.8	97966.4	125733	0.0031633	2.68752	71792.9	111850	76736.1	0.935582	1.45759	0.639647	up
NP_001116558.1 (+1)	65536	74244.7	180295	176585	0.000465632	2.56309	93669.5	178440	124165	0.754395	1.43712	0.929787	up
NP_999472.1	90774.5	163621	244589	350730	0.0539116	2.54915	138750	297659	212429	0.653159	1.40122	1.10118	up
NP_001001539.1	140479	174154	378517	405685	0.00264399	2.52132	162706	392101	274709	0.592286	1.42733	1.26896	up
NP_001038043.1	176585	193235	408507	520666	0.003937	2.5176	211704	464587	324748	0.651903	1.43061	1.1339	up
XP_003121747.3	88906.4	81810.6	118950	303219	0.0999738	2.4772	156285	211085	148222	1.0544	1.42412	0.433643	up
NP_999080.2	27554.5	53231.8	72214.5	107204	0.0721068	2.47048	101799	89709.3	65051.2	1.56491	1.37906	-0.182397	up
XP_020954120.1 (+1)	88292.3	102127	263967	200050	0.00717797	2.44975	128356	232009	163609	0.784527	1.41807	0.85403	up
XP_020945387.1 (+1)	42642.4	34877.3	93975.7	91405.9	0.00210571	2.41565	63816.3	92690.8	65725.3	0.970954	1.41028	0.538502	up
XP_020918538.1	29737.6	27939.1	73222.5	63303.6	0.0010638	2.3694	56353.5	68263.1	48550.7	1.16071	1.40602	0.276601	up
XP_020953010.1	67847.1	62866.3	151609	149522	0.000134834	2.3071	113234	150566	107961	1.04884	1.39463	0.411082	up
XP_020940587.1	170569	127488	244589	422913	0.0499542	2.28729	215332	333751	241390	0.892051	1.38262	0.632209	up
XP_005662840.1	38166	34636.4	109457	55492.3	0.0611155	2.27105	61659.9	82474.5	59437.8	1.03739	1.38758	0.419615	up
XP_005662159.1	101421	78478	160254	234625	0.0249632	2.2313	161727	197440	143695	1.12549	1.37402	0.287855	up
XP_020950035.1	131984	108701	244589	284881	0.00451595	2.22063	195728	264735	192539	1.01656	1.37497	0.435702	up
NP_001106911.1 (+1)	56266.9	46663.3	104273	119778	0.00392224	2.19584	106627	112025	81745.1	1.30439	1.37042	0.071246	up
NP_001230289.1	87682.4	92681.9	180295	209996	0.0014091	2.16557	289124	195145	142664	2.02661	1.36787	-0.567138	up
XP_003484029.1 (+1)	64633.7	33689.2	95950.3	95287.5	0.0598338	2.15883	108780	95618.9	72390.2	1.50269	1.32088	-0.186044	up
XP_005671098.1 (+5)	69754.6	59475.2	113317	162491	0.017922	2.14783	95642.6	137904	101259	0.944532	1.36189	0.527936	up
NP_999563.1	63743.9	56266.9	110218	146445	0.00932623	2.147	88405.9	128332	94168.5	0.938805	1.36279	0.537661	up
NP_999473.1	93326.6	95950.3	177813	223513	0.00410853	2.12072	136266	200663	147651	0.922891	1.35904	0.558354	up
XP_013848623.1	64633.7	44453.2	104998	117313	0.0180949	2.11014	99270.1	111155	82849.4	1.1982	1.34165	0.163145	up
NP_999022.1	80684.3	70239.7	132902	182812	0.0134497	2.10194	116792	157857	116659	1.00113	1.35314	0.434681	up
XP_003126970.2	67847.1	134757	171756	207105	0.0782012	2.09887	92338.7	189430	145366	0.635215	1.30312	1.03666	up
XP_005674599.3	136638	148489	262144	334118	0.0057825	2.09483	155589	298131	220347	0.706109	1.353	0.938205	up
XP_020927281.1	75804.7	80127	163621	161369	6.99302e-05	2.08578	192307	162495	120230	1.59949	1.35153	-0.243018	up
XP_005655319.1	55109	42347.8	52864.1	146445	0.164484	2.08078	93540.4	99654.6	74191.5	1.2608	1.34321	0.0913457	up
NP_001231795.1	49667	53231.8	97966.4	115698	0.0021341	2.07894	90009.1	106832	79140.7	1.13733	1.3499	0.247201	up
NP_001008482.1 (+1)	109457	90774.5	185364	226633	0.00726111	2.07568	149243	205999	153057	0.975083	1.34589	0.464967	up
XP_003358655.1 (+1)	70728.3	89524.8	153726	174154	0.00665616	2.07455	130203	163940	122033	1.06695	1.3434	0.332397	up
NP_001254774.1 (+20)	46341	46987.8	100721	92681.9	0.000227399	2.07237	114660	96701.3	71682.8	1.59955	1.34902	-0.245755	up
NP_001092065.1	59888.9	120611	147464	184083	0.0864679	2.07123	116941	165774	128012	0.91352	1.29499	0.50343	up
XP_003362045.1 (+1)	82952.6	127488	164759	249728	0.0578836	2.06197	111086	207244	156232	0.711033	1.32651	0.899651	up
XP_003132938.1	85877.9	100721	164759	217401	0.0112923	2.06108	128817	191080	142190	0.905951	1.34384	0.568856	up
XP_020921979.1	228210	402883	496007	691802	0.0730565	2.03829	246900	593904	454725	0.542965	1.30607	1.2663	up
XP_020933637.1	114105	88292.3	182812	220436	0.0116326	2.0253	146873	201624	151411	0.970026	1.33163	0.457099	up
NP_998931.1	57052.4	51776.1	105728	114105	0.000755171	2.02475	160605	109916	82165.4	1.95465	1.33775	-0.547106	up
XP_005664319.2	52136.3	49323.9	93975.7	110985	0.00212791	2.02166	90835	102480	76605.1	1.18576	1.33777	0.174024	up
XP_001928684.1 (+9)	65536	85877.9	164759	135694	0.013326	2.02079	242121	150227	112967	2.14329	1.32983	-0.688584	up
NP_998997.1	90774.5	69272.7	125733	190575	0.0385458	2.01267	151499	158154	119089	1.27216	1.32803	0.0620167	up
XP_005669002.2 (+2)	75281.1	72214.5	142441	153726	0.000271771	2.00884	146501	148083	110915	1.32084	1.3351	0.0154937	up
XP_003481579.1	50360.3	48983.2	97966.4	101421	3.66075e-05	2.00744	81146.6	99693.8	74682.8	1.08655	1.3349	0.296973	up
XP_005672670.3	55109	37902.4	90774.5	89524.8	0.0182774	2.00716	82284.1	90149.7	68327.7	1.20426	1.31937	0.131708	up
NP_001137196.1	202842	233005	397336	472515	0.00433552	2.00537	643714	434925	326425	1.97202	1.33239	-0.565653	up
NP_001231403.1	75804.7	76862.9	147464	156956	0.000111108	1.9941	110441	152210	114272	0.966477	1.332	0.462784	up
XP_001924213.1 (+3)	107204	80684.3	177813	189259	0.00941091	1.99338	138420	183536	138740	0.997694	1.32288	0.407008	up
XP_020927188.1 (+5)	93326.6	79573.5	164759	176585	0.0021852	1.9868	150776	170672	128561	1.1728	1.32756	0.178821	up
NP_001090887.1 (+1)	114105	118950	251465	209996	0.00263463	1.98091	162080	230730	173629	0.933484	1.32887	0.509503	up
NP_001231660.1	155872	136638	299044	277091	0.00150051	1.97818	186872	288068	217161	0.860523	1.32651	0.624356	up
NP_001188313.1 (+3)	153726	114105	234625	282913	0.0164944	1.97557	209604	258769	196342	1.06754	1.31795	0.304	up
XP_020940598.1 (+1)	72716.7	56266.9	122295	128375	0.00712173	1.97555	88217	125335	94913.2	0.929449	1.32052	0.506656	up
NP_001038037.3 (+4)	81810.6	85877.9	152664	177813	0.00175202	1.97194	422950	165238	124541	3.39606	1.32678	-1.35594	up
XP_003132811.2	38166	37380.5	90147.5	58656.4	0.0275619	1.96991	60702.9	74401.9	56087.6	1.08229	1.32653	0.293575	up
NP_999518.1	64633.7	65536	130167	124002	5.8484e-05	1.95268	92188.2	127084	96084.5	0.95945	1.32263	0.463129	up
XP_003123547.1 (+5)	215899	207105	375903	443938	0.00225657	1.93898	272166	409921	310711	0.875946	1.3193	0.590856	up
NP_999442.1 (+2)	88906.4	77397.5	155872	164759	0.00151105	1.93726	167930	160316	121734	1.37949	1.31694	-0.0669481	up
NP_001090953.1	218913	353169	469251	577716	0.0474486	1.93676	266557	523483	404762	0.658552	1.29331	0.973699	up
NP_001230730.1	131984	121450	251465	237901	0.000464051	1.93429	166143	244683	185700	0.894687	1.31763	0.558487	up
NP_001123442.1	110985	142441	189259	292890	0.0441354	1.9323	151890	241074	183893	0.825967	1.31095	0.666453	up
XP_020936756.1 (+4)	71715.6	61572.6	130167	125733	0.00174575	1.93108	122426	127950	97296.9	1.25828	1.31504	0.0636633	up
XP_020940685.1 (+2)	45387.3	54350.3	94629.3	95950.3	0.00268117	1.92637	72003.2	95289.8	72579.3	0.992062	1.31291	0.404262	up
NP_001090945.1	459594	881744	1.12384e+06	1.19618e+06	0.0788237	1.91978	532816	1.16001e+06	915338	0.582098	1.2673	1.12242	up
XP_003135070.1	73731.8	69272.7	125733	148489	0.00258682	1.91944	110090	137111	104307	1.05545	1.3145	0.316658	up
NP_999099.1 (+3)	70239.7	62432.1	118950	134757	0.00234858	1.91894	100392	126854	96594.8	1.03932	1.31326	0.337514	up
NP_999309.1	97966.4	114898	184083	220436	0.00630633	1.91246	110910	202260	154346	0.718583	1.31043	0.866813	up
NP_001231846.1 (+1)	72716.7	95950.3	135694	179050	0.0246777	1.90216	184473	157372	120853	1.52643	1.30218	-0.229234	up
NP_001344438.1	64187.3	62000.8	105728	133826	0.00620028	1.89896	93111.7	119777	91435.6	1.01833	1.30996	0.363318	up
NP_001171396.1	90774.5	111757	168221	209996	0.0126856	1.88771	156311	189108	145187	1.07662	1.30252	0.274799	up
XP_005657006.1	34877.3	31000.4	63303.6	60305.4	0.00103945	1.88286	81865.1	61804.5	47371.7	1.72814	1.30467	-0.405537	up
NP_001171401.1	391866	682278	817013	1.05587e+06	0.0740332	1.88111	427230	936441	736757	0.579879	1.27103	1.13218	up
NP_001302729.1	54728.3	45073.8	92041.7	93326.6	0.0036218	1.8749	90835.5	92684.1	71292.6	1.27412	1.30005	0.0290653	up
NP_001231908.1	43538.4	55109	80684.3	101421	0.0161029	1.87178	95674.7	91052.7	70188.2	1.36312	1.29727	-0.0714342	up
NP_001132945.1 (+8)	154795	112534	226633	260333	0.0186991	1.86829	193227	243483	188574	1.02467	1.29118	0.333529	up
NP_001007518.1	107950	158048	201441	275177	0.0472091	1.85771	135504	238309	185654	0.729875	1.28362	0.814496	up
XP_020947548.1	108701	95287.5	162491	214408	0.0136492	1.85568	148764	188450	145222	1.02439	1.29767	0.341152	up
XP_003134785.1	72716.7	68319	131072	130167	0.000133339	1.85409	113339	130619	100569	1.12699	1.29881	0.204718	up
XP_020932552.1 (+1)	77935.9	81810.6	142441	152664	0.000328807	1.84842	139937	147552	113713	1.23062	1.29759	0.0764513	up
XP_003354674.1 (+1)	85284.7	101421	162491	179050	0.00409446	1.84306	177326	170770	132062	1.34276	1.29311	-0.0543506	up
NP_001304012.1 (+2)	59888.9	53231.8	101421	105728	0.00106623	1.83759	88218	103575	80067.5	1.1018	1.29359	0.231526	up
NP_001026946.1	134757	146445	220436	294927	0.0135345	1.83589	180460	257682	199141	0.90619	1.29396	0.513911	up
XP_003122046.1	75804.7	72716.7	131072	141457	0.000364095	1.83574	96116.1	136264	105263	0.913108	1.29452	0.503558	up
XP_020955150.1	62000.8	60305.4	100721	123145	0.00443274	1.83072	111668	111933	86543	1.29032	1.29338	0.00342032	up
XP_003356615.2 (+1)	21769.2	25888.1	52136.3	34397.1	0.0389563	1.82941	105299	43266.7	33547.7	3.13878	1.28971	-1.28316	up
NP_001038002.1 (+7)	208545	223513	419991	368167	0.00182424	1.82639	264037	394079	305054	0.865543	1.29183	0.577743	up
XP_001929257.1 (+4)	59064.4	57848.8	99334	114105	0.00152817	1.82582	70975.3	106719	82588	0.85939	1.29219	0.588434	up
XP_020953074.1 (+1)	141457	131072	223513	271388	0.00492243	1.8186	174225	247451	191858	0.908094	1.28976	0.506193	up
XP_020927102.1 (+5)	93326.6	93975.7	134757	204253	0.0324325	1.80999	131758	169505	131578	1.00137	1.28825	0.363438	up
NP_001161107.1	73731.8	70728.3	128375	132902	9.36076e-05	1.80942	295701	130638	101434	2.9152	1.28791	-1.17856	up
NP_999422.1	73731.8	72214.5	129267	134757	5.93928e-05	1.80925	118494	132012	102493	1.15612	1.28802	0.155854	up
NP_001098779.1 (+9)	109457	104273	191901	193235	7.04067e-05	1.80304	132150	192568	149716	0.882671	1.28622	0.543189	up
XP_020950836.1 (+1)	99334	76862.9	153726	158048	0.00929547	1.79872	138302	155887	121993	1.13369	1.27784	0.172677	up
XP_020945329.1 (+2)	59064.4	55109	105728	99334	0.000485298	1.79822	92753.6	102531	79808.9	1.1622	1.28471	0.144586	up
XP_020938530.1	84110.6	80127	147464	147464	6.92011e-05	1.79679	235720	147464	114791	2.05347	1.28462	-0.676715	up
XP_005667358.1	74244.7	81245.5	129267	147464	0.0024426	1.78335	182194	138366	108055	1.68612	1.28051	-0.396994	up
XP_020949539.1	113317	124002	201441	220436	0.00126825	1.7813	175749	210939	164799	1.06644	1.27998	0.263309	up
XP_020938645.1 (+1)	197296	184083	353169	324982	0.00078501	1.78029	242683	339076	264883	0.916191	1.2801	0.482534	up
NP_001026957.1	57848.8	56658.3	112534	90147.5	0.0065232	1.77022	101690	101341	79297.1	1.28239	1.27799	-0.00496461	up
XP_020933341.1	61572.6	91405.9	119778	140479	0.0377113	1.76853	95496.1	130129	103309	0.924374	1.25961	0.446424	up
XP_003353842.1	56266.9	40622.7	79573.5	86475.3	0.0207224	1.75967	86419.7	83024.4	65734.6	1.31468	1.26302	-0.0578245	up
XP_003123233.2	63743.9	99334	122295	149522	0.0541832	1.75015	111388	135908	108724	1.0245	1.25003	0.287044	up
XP_003122961.6	93326.6	167059	200050	218913	0.0814306	1.74927	107590	209482	169837	0.633487	1.23343	0.961284	up
XP_013833854.1	127488	110985	205674	208545	0.00177685	1.74533	163846	207110	163173	1.00413	1.26926	0.338052	up
XP_020924271.1 (+1)	28924.4	23821.9	41764.8	49323.9	0.0102859	1.74324	45308.4	45544.4	35958.8	1.26001	1.26657	0.00749362	up
NP_001193284.1 (+4)	64633.7	65536	97289.7	129267	0.0137115	1.74056	129267	113279	89181.7	1.44948	1.2702	-0.190484	up
XP_013847913.2	86475.3	76862.9	142441	140479	0.00112671	1.73813	255867	141460	111565	2.29344	1.26797	-0.854997	up
NP_001231105.1 (+6)	341139	443938	581734	757035	0.0290296	1.73502	363366	669384	530962	0.684354	1.2607	0.881413	up
NP_001157469.1 (+3)	99334	89524.8	158048	168221	0.00122036	1.73225	128662	163134	128782	0.99907	1.26675	0.342473	up
NP_001231470.1 (+1)	45073.8	45387.3	77397.5	79023.8	7.444e-06	1.72918	91094.6	78210.7	61720.6	1.47592	1.26717	-0.22	up
NP_001005726.1 (+2)	76862.9	77935.9	134757	132902	5.32799e-06	1.72916	160393	133829	105614	1.51866	1.26715	-0.261213	up
NP_001090965.1	71715.6	67378.5	110985	129267	0.00301531	1.72894	106593	120126	94836.5	1.12396	1.26666	0.172437	up
NP_001231854.1 (+1)	305328	303219	402883	645474	0.0516704	1.72274	536723	524178	414226	1.29573	1.26544	-0.0341203	up
XP_020952016.1	176585	215899	353169	316095	0.00793837	1.72249	216648	334632	265437	0.816194	1.26068	0.627223	up
XP_020921579.1	100025	124864	139509	242900	0.0898632	1.72143	146046	191204	151824	0.961939	1.25938	0.388694	up
XP_003123069.1 (+4)	74761.1	90774.5	118950	162491	0.0289756	1.71625	95072.5	140721	111744	0.850804	1.25931	0.565735	up
NP_001302675.1	95950.3	87682.4	145433	168221	0.00351695	1.71152	123125	156827	124322	0.990377	1.26146	0.349048	up
XP_003131202.2 (+5)	82952.6	67847.1	119778	135694	0.00887404	1.71128	124142	127736	101568	1.22226	1.25764	0.0411686	up
XP_001924955.1	65083.3	60305.4	93975.7	119778	0.0108962	1.7072	88740.6	106877	84785.5	1.04665	1.26055	0.26828	up
NP_001004043.1	94629.3	95287.5	168221	155872	0.000331608	1.70652	181706	162046	128502	1.41403	1.26104	-0.165199	up
NP_001231091.1	42642.4	28526.2	57848.8	58656.4	0.0366153	1.70407	89630.2	58252.6	46918.4	1.91034	1.24157	-0.621663	up
NP_999185.1 (+2)	81245.5	72716.7	124864	136638	0.00211853	1.70371	169538	130751	103866	1.63227	1.25884	-0.374784	up
XP_020936850.1	44762.4	32768	71715.6	57052.4	0.034227	1.7016	138738	64384	51574.6	2.69005	1.24837	-1.10759	up
XP_003129998.3	167059	129267	294927	198668	0.0564846	1.69325	204440	246798	197481	1.03524	1.24973	0.271653	up
XP_020954473.1 (+1)	263967	338783	482443	520666	0.0121706	1.69026	334696	501555	401465	0.833686	1.24931	0.583558	up
XP_005674576.2	62432.1	44453.2	89524.8	85877.9	0.0251469	1.68882	80611.3	87701.4	70572	1.14226	1.24272	0.121618	up
NP_001230202.1 (+4)	61572.6	58656.4	102127	100721	0.000100127	1.68817	101636	101424	80769.1	1.25835	1.25572	-0.00301788	up
NP_001231465.1	114105	92041.7	170569	172951	0.00717573	1.6857	141469	171760	137417	1.02949	1.24992	0.279909	up
XP_020919946.1	134757	167059	221969	280959	0.021459	1.68565	167753	251464	201186	0.833819	1.24991	0.584015	up
NP_999452.1	79573.5	69754.6	124002	126607	0.00180322	1.68553	130637	125304	99984.2	1.30657	1.25324	-0.0601239	up
XP_020935181.1	284881	462791	614903	573725	0.0611481	1.68519	295542	594314	484075	0.610529	1.22773	1.00786	up
XP_020955153.1	59064.4	80127	107204	121450	0.0234061	1.68123	92060.3	114327	91961.3	1.00108	1.24321	0.312514	up
NP_999398.1 (+1)	89524.8	92041.7	125733	179050	0.0281737	1.67895	143127	152391	121587	1.17715	1.25335	0.0904848	up
NP_001230376.1 (+1)	49323.9	40622.7	69272.7	80127	0.0103573	1.67667	99684.3	74699.8	59836.6	1.66594	1.2484	-0.41626	up
NP_001231316.1 (+2)	73731.8	54350.3	86475.3	123145	0.0577608	1.67496	116671	104810	84425.6	1.38194	1.24145	-0.154664	up
XP_020931615.1 (+9)	56658.3	82379.6	130167	94629.3	0.0653459	1.67409	86190.5	112398	90958.5	0.947581	1.23571	0.383016	up
XP_005665215.2 (+2)	44762.4	47314.7	73222.5	80684.3	0.00111144	1.67278	73091.6	76953.4	61496	1.18856	1.25136	0.0742803	up
XP_003124794.2	110218	174154	212927	237901	0.057853	1.66975	155921	225414	183800	0.848319	1.22641	0.531762	up
NP_001172107.1	75281.1	93975.7	120611	156956	0.0278918	1.66017	100461	138783	111706	0.899337	1.2424	0.466196	up
XP_003131979.1 (+3)	145433	176585	277091	251465	0.00793562	1.65689	187489	264278	212644	0.881704	1.24282	0.495253	up
XP_020949284.1 (+5)	154795	187951	269514	292890	0.00734909	1.65638	198033	281202	226288	0.875137	1.24268	0.505868	up
NP_001153899.1 (+8)	82952.6	74761.1	133826	126607	0.00135914	1.65577	119564	130217	104537	1.14375	1.24565	0.123132	up
NP_999268.1 (+1)	138545	141457	244589	218913	0.00119507	1.65553	191410	231751	185876	1.02977	1.2468	0.275914	up
XP_003129089.2	36611.3	36358.4	64633.7	55878.3	0.00255512	1.65156	73991.8	60256	48370.4	1.52969	1.24572	-0.29626	up
XP_020947582.1 (+3)	72214.5	80127	129267	121450	0.00150145	1.65021	106612	125359	100765	1.05803	1.24407	0.233697	up
NP_001161111.1	65536	54728.3	102837	93975.7	0.00655326	1.64982	75977.2	98406.3	79269.3	0.95847	1.24142	0.373185	up
XP_003133716.2 (+8)	77935.9	65991.8	119778	115698	0.00403568	1.64741	134594	117738	94850.8	1.41901	1.24129	-0.19304	up
NP_001182041.1	92681.9	102127	150562	165905	0.00229761	1.62833	109762	158234	127819	0.858727	1.23795	0.527683	up
NP_001230139.1 (+1)	24491.6	21321.2	40622.7	33456.5	0.0113024	1.62478	63730.6	37039.6	29973	2.12627	1.23577	-0.782916	up
NP_001038066.1 (+3)	87076.8	65991.8	117313	126607	0.0187017	1.62435	144926	121960	99247.1	1.46025	1.22885	-0.248905	up
XP_020926701.1	82952.6	107204	123145	180295	0.0622833	1.62212	119564	151720	123399	0.968919	1.22951	0.34363	up
NP_001243700.2 (+1)	71220.3	100721	115698	154795	0.0605352	1.62089	138133	135246	110608	1.24885	1.22275	-0.0304715	up
XP_020955511.1	103552	85877.9	163621	140479	0.0118714	1.61944	151196	152050	123383	1.22542	1.23235	0.0081284	up
NP_999360.1 (+11)	60305.4	59064.4	95287.5	97966.4	3.93997e-05	1.61913	134550	96627	78155.9	1.72156	1.23634	-0.477645	up
XP_003124520.1	79573.5	56658.3	118129	95950.3	0.0446143	1.61719	144207	107040	87577.7	1.64662	1.22222	-0.43	up
XP_005662419.1	119778	91405.9	169391	165905	0.0162323	1.61688	269300	167648	136620	1.97116	1.22711	-0.683776	up
XP_001928392.1	66450.8	50360.3	90147.5	94629.3	0.018198	1.61244	171449	92388.4	75397	2.27395	1.22536	-0.891993	up
XP_020921668.1 (+3)	106464	84110.6	131984	170569	0.0326135	1.60973	146527	151277	123282	1.18855	1.22708	0.0460219	up
XP_003127816.2	126607	86475.3	164759	164759	0.0406249	1.60331	137417	164759	135650	1.01302	1.21459	0.261803	up
XP_003483336.1 (+2)	72214.5	73222.5	101421	131072	0.0147507	1.59866	125079	116247	94482.6	1.32383	1.23035	-0.105646	up
NP_999292.2	76332	105728	127488	155872	0.0424884	1.59807	140076	141680	116355	1.20387	1.21765	0.0164253	up
XP_001928194.1 (+1)	74761.1	74761.1	101421	136638	0.0223766	1.59213	141212	119030	96895.4	1.45737	1.22843	-0.246541	up
XP_013851133.1 (+2)	80684.3	68794.2	131984	103552	0.0215525	1.58575	298085	117768	96253.6	3.09687	1.22352	-1.33978	up
NP_001116587.1 (+3)	25180.2	20882.4	47314.7	25006.2	0.142979	1.58385	46501.3	36160.5	29595.9	1.57121	1.22181	-0.36286	up
NP_001231134.1 (+2)	124002	113317	186653	187951	0.000771718	1.5817	201938	187302	152981	1.32002	1.22435	-0.108541	up
NP_001231662.1	40622.7	34159.5	60724.9	56658.3	0.00640593	1.58148	87610.6	58691.6	48041.4	1.82365	1.22169	-0.577951	up
NP_001230836.1	82952.6	78478	126607	128375	0.000198227	1.58073	171245	127491	104103	1.64496	1.22466	-0.425667	up
XP_020931919.1	127488	115698	177813	205674	0.00535249	1.58065	173509	191743	156668	1.10749	1.22388	0.144169	up
XP_020950937.1 (+1)	63743.9	73222.5	97966.4	117313	0.011289	1.57933	91683.1	107640	88061.4	1.04113	1.22232	0.231482	up
XP_020950666.1	113317	133826	168221	218913	0.0266024	1.5773	143469	193567	158569	0.904774	1.22071	0.432092	up
NP_001001643.1	88906.4	95287.5	143431	146445	0.000407118	1.57565	146755	144938	118518	1.23826	1.22293	-0.0179746	up
XP_003131422.1	126607	148489	204253	225068	0.00664465	1.57056	159149	214661	176104	0.903719	1.21894	0.43168	up
XP_020922086.1	111757	129267	181549	194579	0.00438833	1.56882	143190	188064	154288	0.928067	1.21892	0.393298	up
XP_020956199.1	256749	299044	348307	517070	0.0584456	1.56608	280081	432688	355293	0.78831	1.21784	0.627486	up
NP_001093401.1	195933	209996	279018	355626	0.015577	1.56532	232040	317322	260143	0.891971	1.2198	0.451573	up
XP_005672502.2	59064.4	80127	94629.3	118129	0.0449828	1.56435	86618.8	106379	87987.3	0.984447	1.20903	0.296461	up
XP_020940443.1	28924.4	21618.8	39786.7	37380.5	0.0246362	1.55934	65790.3	38583.6	31927.6	2.06061	1.20847	-0.769886	up
XP_020930782.1	95287.5	105728	134757	176585	0.0234717	1.55303	151946	155671	128089	1.18625	1.21533	0.0349407	up
XP_005661793.1	95287.5	127488	138545	200050	0.0777912	1.55233	109257	169298	140343	0.778502	1.20632	0.631835	up
NP_001335695.1	113317	132902	168221	211456	0.0214376	1.55185	224301	189839	156474	1.43347	1.21323	-0.240663	up
XP_020922659.1 (+1)	610656	434802	1.16347e+06	408507	0.319907	1.5474	656677	785987	654358	1.00354	1.20116	0.259323	up
XP_020927212.1	56658.3	42642.4	73731.8	76862.9	0.0232311	1.54738	75348.6	75297.4	62473.9	1.20608	1.20526	-0.000980899	up
XP_003122377.2 (+1)	140479	155872	198668	258535	0.0225449	1.54695	144604	228601	188389	0.767584	1.21346	0.660728	up
XP_001926075.4 (+1)	100025	93975.7	135694	163621	0.00844103	1.54436	167403	149658	123329	1.35737	1.21348	-0.161662	up
XP_003356469.2 (+1)	212927	176585	320508	275177	0.0149604	1.54274	268805	297842	246299	1.09138	1.20927	0.147987	up
XP_020939896.1	74761.1	92041.7	121450	132902	0.0125699	1.54141	109881	127176	105289	1.04362	1.20788	0.210882	up
NP_998926.1 (+4)	66450.8	55878.3	102837	84110.6	0.0195482	1.53974	172914	93473.8	77319.2	2.23637	1.20893	-0.887424	up
XP_020938146.1	73731.8	60305.4	116502	87682.4	0.0397013	1.53878	101671	102092	84555.5	1.20242	1.2074	0.00596768	up
NP_001038075.1	96617.7	115698	149522	174154	0.0143464	1.53692	167346	161838	133998	1.24887	1.20777	-0.0482851	up
NP_001090932.1	53602	65083.3	87076.8	93326.6	0.00987375	1.53437	94791.8	90201.7	74772.2	1.26774	1.20635	-0.071609	up
XP_003483187.1	52498.9	62866.3	90147.5	85284.7	0.00772164	1.53305	91466.9	87716.1	72699.4	1.25815	1.20656	-0.060407	up
XP_003124605.2	51776.1	46663.3	73222.5	76862.9	0.0018715	1.52877	115520	75042.7	62131.2	1.85929	1.20781	-0.622359	up
XP_020952216.1 (+4)	80127	72214.5	114898	117313	0.00148474	1.5284	120190	116106	96138.1	1.25018	1.2077	-0.0498845	up
NP_001172063.1	60305.4	55109	75804.7	100025	0.0259362	1.52656	185170	87914.8	72811	2.54315	1.20744	-1.07467	up
XP_005657025.1	71715.6	73731.8	105728	115698	0.0010731	1.52267	105405	110713	91718.3	1.14922	1.2071	0.0708818	up
XP_020950227.1	72214.5	113317	133826	134757	0.0749015	1.52236	110646	134292	113529	0.974609	1.18289	0.279418	up
XP_020933988.1 (+2)	31872	27939.1	52864.1	37640.5	0.0466454	1.51975	105604	45252.3	37578.9	2.81019	1.20419	-1.2226	up
XP_003356046.1	195933	221969	334118	296979	0.00630798	1.51604	246643	315549	262250	0.940491	1.20324	0.355435	up
NP_001231365.1 (+7)	105728	92041.7	135694	162491	0.0139429	1.51499	165617	149093	123989	1.33574	1.20247	-0.151642	up
XP_003134775.1	29944.4	37380.5	45073.8	55492.3	0.0306709	1.51219	104706	50283	41972.8	2.49461	1.19799	-1.05819	up
XP_003131986.3 (+1)	12416.8	8248.98	13216	16728.3	0.0880161	1.51042	192712	14972.1	12652.5	15.2311	1.18333	-3.68609	up
NP_001116600.1 (+2)	108701	134757	174154	189259	0.0146456	1.51001	144065	181706	151717	0.949559	1.19766	0.33489	up
XP_020947079.1 (+4)	105728	111757	153726	172951	0.00298124	1.50322	125899	163338	136040	0.925456	1.20066	0.375593	up
NP_001032223.1	73222.5	70239.7	102127	113317	0.0019238	1.50239	109581	107722	89726.4	1.22128	1.20056	-0.0246883	up
XP_001926738.1	153726	212927	258535	277091	0.0396536	1.49996	188123	267813	225570	0.83399	1.18727	0.50955	up
XP_005652636.3	57848.8	55878.3	78478	92041.7	0.00577285	1.49983	152478	85259.8	71061.7	2.14572	1.1998	-0.838665	up
NP_999445.1	96617.7	141457	172951	170569	0.0555663	1.49598	159921	171760	145399	1.09988	1.1813	0.103032	up
NP_001231343.2 (+4)	84695.6	82379.6	128375	121450	0.000343712	1.49557	105870	124912	104225	1.01578	1.19849	0.238626	up
NP_001090927.1 (+6)	79023.8	77935.9	104273	130167	0.0140199	1.4937	120789	117220	97849.7	1.23443	1.19796	-0.0432709	no
NP_001038071.1	82952.6	127488	147464	152664	0.0742035	1.49306	160350	150064	127642	1.25625	1.17566	-0.0956497	no
NP_999496.1	62000.8	80127	97289.7	110985	0.0287363	1.48963	104643	104137	87600.5	1.19455	1.18877	-0.00699352	no
NP_001231384.1	204253	249728	318294	350730	0.0145479	1.48862	249641	334512	280751	0.889188	1.19149	0.422205	no
XP_020934146.1	49323.9	67378.5	84110.6	84695.6	0.0357416	1.48194	88835.8	84403.1	71377.2	1.2446	1.18249	-0.0738455	no
XP_003358507.1 (+3)	74244.7	76862.9	113317	110218	0.000135331	1.47975	158940	111767	93660.5	1.69698	1.19332	-0.507987	no
XP_003481635.2	168221	147464	345901	118950	0.338445	1.47891	287999	232426	195134	1.4759	1.19111	-0.309294	no
XP_003129727.4	116502	101421	179050	141457	0.0261699	1.4778	130090	160253	134607	0.966439	1.19052	0.300843	no
NP_001186971.1	99334	119778	146445	174154	0.0219856	1.47602	139676	160299	134928	1.03519	1.18804	0.198682	no
XP_020949508.1 (+4)	127488	149522	202842	202842	0.00598474	1.47384	185739	202842	170674	1.08827	1.18848	0.127083	no
NP_001230514.1 (+4)	469251	360590	659037	539028	0.0442812	1.46891	487180	599032	506976	0.960952	1.18158	0.29818	no
XP_003354050.1	80684.3	70728.3	127488	93326.6	0.0470238	1.46469	130697	110407	93056.7	1.40448	1.18645	-0.243389	no
NP_001231345.1	38166	40342.1	57848.8	57052.4	0.000307044	1.46468	76864.8	57450.6	48352.3	1.58968	1.18817	-0.42	no
XP_003123930.2	72214.5	72716.7	108701	103552	0.000194244	1.46453	113979	106126	89296	1.27642	1.18848	-0.102987	no
NP_001116645.1	68319	68794.2	106464	93975.7	0.0031227	1.46187	107558	100220	84388.1	1.27456	1.1876	-0.10195	no
XP_020931744.1 (+2)	124864	189259	223513	215899	0.0767922	1.46022	208394	219706	188384	1.10622	1.16627	0.076264	no
XP_020931284.1	80684.3	126607	158048	129267	0.112292	1.45758	112778	143658	123652	0.912062	1.16179	0.349149	no
NP_999497.1	37902.4	42347.8	57449.2	59064.4	0.00247028	1.45635	85217	58256.8	49190.9	1.73237	1.1843	-0.548716	no
XP_005663049.1 (+2)	66450.8	83529.6	98647.9	116502	0.0314465	1.45337	119683	107575	91282.7	1.31112	1.17848	-0.153869	no
XP_020952738.1 (+3)	114898	154795	182812	200050	0.0400465	1.45138	146550	191431	163139	0.898316	1.17342	0.385428	no
XP_020923210.1 (+1)	95950.3	85284.7	120611	141457	0.0122266	1.45103	126951	131034	110826	1.1455	1.18234	0.0456693	no
NP_001193288.1 (+1)	106464	90774.5	138545	145433	0.00755281	1.44895	135996	141989	120304	1.13043	1.18025	0.0622228	no
NP_001335871.1 (+1)	91405.9	79023.8	118129	127488	0.00727781	1.44881	141766	122808	104012	1.36299	1.18072	-0.207106	no
XP_001924948.2	141457	169391	198668	248003	0.0329337	1.44864	185298	223336	189380	0.978445	1.1793	0.269368	no
XP_020921243.1	190575	239555	307452	307452	0.0181314	1.44835	228741	307452	261258	0.875536	1.17681	0.426644	no
XP_020925245.1 (+2)	39511.9	27175.1	43237.6	50012.5	0.074439	1.44787	107831	46625	39984.3	2.69683	1.16608	-1.20959	no
NP_001038072.1 (+2)	67847.1	80684.3	96617.7	116502	0.0247908	1.44565	142608	106560	90412.9	1.5773	1.17859	-0.42039	no
XP_003122673.2 (+1)	98647.9	116502	136638	171756	0.0327273	1.44333	151512	154197	130886	1.15759	1.1781	0.0253431	no
NP_001033783.1 (+7)	41189.8	35857.8	62000.8	48644.9	0.0316886	1.44298	121874	55322.9	46923.3	2.5973	1.17901	-1.13944	no
NP_001172062.1 (+1)	93326.6	100025	132902	145433	0.00260627	1.44126	174572	139168	117922	1.48041	1.18017	-0.326999	no
XP_003129266.2	97289.7	77397.5	131984	116502	0.0266151	1.44115	145935	124243	105793	1.37943	1.17439	-0.232157	no
NP_001005730.1 (+1)	114898	83529.6	130167	148489	0.0538446	1.44031	166317	139328	119271	1.39445	1.16816	-0.25545	no
NP_001090923.1	103552	78478	121450	135694	0.0378271	1.43997	154263	128572	109794	1.40503	1.17103	-0.262815	no
XP_003125099.3	122295	167059	181549	225068	0.0677834	1.43972	181359	203308	173993	1.04234	1.16849	0.164823	no
NP_999152.1	65991.8	64187.3	92681.9	94629.3	7.74216e-05	1.43915	119967	93655.6	79372.6	1.51144	1.17995	-0.357196	no
NP_001116560.1	82379.6	94629.3	106464	146445	0.0558831	1.43567	150227	126454	107479	1.39773	1.17654	-0.248526	no
XP_020923377.1 (+1)	128375	106464	144429	189259	0.0496201	1.4334	163739	166844	142131	1.15202	1.17387	0.0271025	no
XP_003125720.2 (+5)	80127	63303.6	93975.7	108701	0.0323399	1.43277	147974	101338	86526.7	1.71015	1.17118	-0.546167	no
XP_020937145.1 (+2)	74244.7	62000.8	92041.7	101421	0.0145106	1.43152	105031	96731.5	82427.1	1.27423	1.17354	-0.118758	no
XP_003354782.3 (+1)	69272.7	59064.4	85877.9	96617.7	0.0133395	1.43106	77296.1	91247.8	77708.2	0.994698	1.17424	0.239394	no
XP_003133921.2	83529.6	100721	127488	133826	0.0124018	1.43071	132513	130657	111391	1.18962	1.17296	-0.020348	no
XP_020942748.1 (+1)	76332	87682.4	111757	121450	0.00761171	1.42871	155905	116603	99305.2	1.56996	1.17419	-0.419065	no
XP_020955529.1	107950	76332	111757	143431	0.0929765	1.42677	139602	127594	109867	1.27064	1.16134	-0.129755	no
NP_999495.1	122295	136638	182812	185364	0.00265461	1.42627	179347	184088	156777	1.14396	1.1742	0.0376414	no
XP_020953149.1 (+5)	164759	149522	220436	226633	0.00197517	1.42586	171990	223535	190338	0.903607	1.17441	0.37817	no
NP_001001632.1 (+9)	97289.7	105728	148489	140479	0.00192348	1.42583	151640	144484	122997	1.23288	1.1747	-0.0697366	no
XP_001928883.1	170569	161369	226633	246290	0.00192348	1.42583	192039	236462	201215	0.954395	1.17517	0.300208	no
XP_003123013.1	118129	162491	185364	204253	0.0526522	1.424	157915	194809	167559	0.942446	1.16263	0.302905	no
XP_003481903.1 (+1)	49667	97289.7	113317	73731.8	0.282062	1.42216	104395	93524.2	83501.3	1.25022	1.12003	-0.158645	no
XP_020933187.1	108701	102837	131072	169391	0.0292617	1.42147	137227	150232	128000	1.07208	1.17368	0.130627	no
XP_020928360.1	53602	101421	100721	98647.9	0.194829	1.42129	74629.7	99684.3	88597.9	0.842341	1.12513	0.417616	no
NP_001231327.1	98647.9	118129	148489	156956	0.0121331	1.4205	167921	152723	130555	1.2862	1.16979	-0.136865	no
XP_003124328.1 (+2)	124864	107950	167059	161369	0.00640326	1.41817	153193	164214	140310	1.09182	1.17036	0.100223	no
XP_020955797.1	115698	135694	156956	197296	0.0350296	1.41813	125714	177126	151411	0.830281	1.16984	0.494635	no
XP_020940210.1 (+18)	76332	70728.3	97966.4	110218	0.00535987	1.4177	108874	104092	88811.2	1.2259	1.17206	-0.0647926	no
NP_001072131.1	102837	135694	147464	184083	0.0637663	1.41684	127671	165774	142520	0.89581	1.16316	0.376788	no
XP_001927122.3	55492.3	61572.6	80127	85284.7	0.0035292	1.41681	94731.3	82705.8	70619.1	1.34144	1.17115	-0.195852	no
XP_003122859.1 (+10)	70239.7	16046.8	37902.4	36107.2	0.477244	1.41644	120950	37004.8	40074	3.01817	0.923411	-1.70863	no
XP_020921058.1	88906.4	97966.4	208545	55492.3	0.44638	1.41625	136882	132019	112728	1.21427	1.17113	-0.0521859	no
NP_001171402.1	121450	159147	176585	212927	0.0537318	1.41367	225722	194756	167527	1.34738	1.16253	-0.212882	no
NP_001038026.1	55109	63303.6	76862.9	89524.8	0.0162114	1.41191	99562.2	83193.9	71200.1	1.39834	1.16845	-0.259121	no
XP_020942483.1 (+5)	93975.7	114105	140479	150562	0.0161314	1.41191	139679	145521	124781	1.11939	1.16621	0.0591142	no
NP_001193289.1	17559.9	14462.2	21769.2	23010.4	0.0152496	1.41161	75811.1	22389.8	19200.4	3.94841	1.16611	-1.75957	no
NP_001156360.1 (+3)	112534	108701	137588	174154	0.0239651	1.40953	182288	155871	133244	1.36808	1.16982	-0.225871	no
NP_001177128.1 (+1)	47975.2	42939	61147.3	66450.8	0.00543313	1.40782	92737.6	63799	54628.1	1.69762	1.16788	-0.539619	no
XP_020949569.1	84695.6	79573.5	112534	118129	0.00106588	1.40554	130083	115331	98732.9	1.31752	1.16811	-0.173647	no
XP_005673018.1	84110.6	109457	125733	141457	0.040366	1.40442	110912	133595	115189	0.962865	1.15979	0.268452	no
XP_003124567.2 (+5)	147464	57052.4	110218	120611	0.344982	1.40281	174080	115414	108836	1.59946	1.06044	-0.592923	no
XP_020942934.1	51063.3	42055.3	62432.1	66913.1	0.0168989	1.40216	62176.6	64672.6	55615.9	1.11796	1.16284	0.0567814	no
XP_003354529.1 (+3)	136638	138545	149522	236257	0.114347	1.40197	246856	192890	165241	1.49392	1.16733	-0.355893	no
XP_020925254.1 (+1)	59475.2	56658.3	77935.9	84695.6	0.00194999	1.40121	125011	81315.8	69691.2	1.79379	1.1668	-0.62045	no
XP_020941840.1	21321.2	20031.7	24662	33225.4	0.0464679	1.4012	80385.5	28943.7	24810.1	3.24004	1.16661	-1.47369	no
NP_001231138.1 (+2)	69754.6	65083.3	88292.3	100025	0.00619213	1.3983	267050	94158.6	80788.8	3.30554	1.16549	-1.50395	no
XP_003128059.3	70239.7	49667	78478	84110.6	0.0672429	1.39708	156715	81294.3	70623.8	2.21901	1.15109	-0.946918	no
NP_001138313.1	70728.3	78478	95950.3	111757	0.0129315	1.39584	120052	103853	89228.3	1.34545	1.16391	-0.209113	no
XP_005666244.1 (+8)	101421	101421	139509	143431	4.96871e-05	1.39488	135581	141470	121446	1.11639	1.16488	0.0613459	no
XP_001927830.4 (+1)	107204	95950.3	133826	148489	0.00758689	1.39394	146443	141158	121367	1.20661	1.16306	-0.0530315	no
XP_020930051.1	153726	208545	215899	277091	0.0889479	1.39272	213201	246495	213815	0.997127	1.15284	0.209345	no
XP_020943659.1 (+3)	71220.3	88906.4	103552	116502	0.0301894	1.39123	122284	110027	95045.3	1.28658	1.15763	-0.152369	no
NP_001106758.1 (+2)	84110.6	91405.9	120611	123145	0.00146077	1.3912	110179	121878	104818	1.05114	1.16276	0.145592	no
XP_003135377.2 (+1)	105728	116502	137588	170569	0.0257263	1.38993	157504	154079	132597	1.18784	1.16201	-0.0317212	no
XP_005655282.2 (+1)	98647.9	139509	150562	170569	0.0767068	1.3893	172893	160566	139822	1.23652	1.14836	-0.106711	no
NP_001186819.1 (+7)	79023.8	89524.8	112534	120611	0.00651161	1.38864	128348	116572	100423	1.27807	1.16081	-0.138832	no
XP_020920571.1 (+2)	87682.4	90774.5	117313	130167	0.00306284	1.38719	111176	123740	106484	1.04407	1.16205	0.154458	no
NP_001177123.1	43841.2	53602	59475.2	74244.7	0.0483128	1.38619	107145	66859.9	57790.8	1.85401	1.15693	-0.680348	no
NP_999371.1	71220.3	53231.8	67847.1	100721	0.144253	1.38338	103092	84283.9	73255	1.40731	1.15056	-0.290607	no
XP_020920924.1	23987.6	22226.6	28924.4	34877.3	0.0176794	1.38257	108098	31900.8	27504	3.93028	1.15986	-1.76068	no
NP_998908.1	187951	220436	275177	284881	0.00991307	1.38012	233972	280029	242111	0.966383	1.15661	0.259239	no
XP_003124094.3	107204	131072	151609	172951	0.0290708	1.37592	183009	162280	140709	1.30062	1.1533	-0.173428	no
NP_999103.1	95950.3	118129	138545	152664	0.0258131	1.37505	144934	145605	126322	1.14733	1.15265	0.00666557	no
XP_005661711.1	327242	394591	462791	520666	0.0235459	1.37441	353311	491729	426323	0.82874	1.15342	0.476925	no
NP_001182249.1 (+3)	174154	172951	187951	288858	0.112399	1.37369	266195	238405	205978	1.29235	1.15743	-0.159073	no
XP_001925971.4	97289.7	98647.9	140479	128375	0.00194451	1.37221	139345	134427	116198	1.1992	1.15688	-0.0518383	no
XP_020920297.1	61572.6	68319	82952.6	94629.3	0.0113218	1.37085	90698.2	88791	76868.4	1.17991	1.1551	-0.0306601	no
XP_001924714.2	77397.5	78478	94629.3	118950	0.0262114	1.37026	107550	106790	92363.8	1.16442	1.15619	-0.0102363	no
NP_001155225.1	135694	118950	174154	172951	0.00577052	1.36901	171552	173552	150437	1.14036	1.15365	0.0167217	no
XP_005662521.1 (+2)	90774.5	102127	112534	150562	0.0583701	1.36863	120103	131548	113999	1.05354	1.15394	0.131321	no
NP_001302707.1	51776.1	52136.3	67378.5	74761.1	0.00294428	1.36789	84772.1	71069.8	61513	1.37812	1.15536	-0.254353	no
NP_999062.1	73731.8	103552	107950	127488	0.0899984	1.36669	101478	117719	103180	0.9835	1.1409	0.214178	no
XP_020926693.1	131984	148489	171756	209996	0.0282281	1.36583	184483	190876	165556	1.11432	1.15294	0.0491493	no
NP_001093400.1	100721	98647.9	154795	117313	0.0439757	1.365	147708	136054	117869	1.25316	1.15428	-0.118575	no
XP_020954074.1 (+1)	47314.7	46987.8	68319	60305.4	0.00509037	1.36397	76846.8	64312.2	55731.7	1.37887	1.15396	-0.256893	no
XP_020945028.1	72214.5	126607	125733	124864	0.190796	1.36238	112557	125298	112355	1.0018	1.1152	0.154718	no
XP_020926668.1	63303.6	63743.9	87682.4	85284.7	6.59357e-05	1.36145	115440	86483.6	75003.7	1.53912	1.15306	-0.416644	no
XP_003122917.2	131072	168221	189259	211456	0.0434889	1.35982	152393	200357	175002	0.870808	1.14489	0.394778	no
XP_005657073.1 (+8)	74244.7	92041.7	110985	112534	0.0235367	1.35975	142092	111759	97451.2	1.45808	1.14682	-0.346429	no
XP_005662039.1 (+1)	136638	151609	194579	195933	0.00311253	1.35845	192130	195256	169690	1.13224	1.15066	0.0232826	no
NP_001231804.1	102837	97966.4	137588	134757	0.00042312	1.35708	130012	136173	118287	1.09912	1.1512	0.0667911	no
NP_999055.1 (+3)	50360.3	52136.3	68794.2	70239.7	0.000191127	1.35688	183262	69517	60382.6	3.03501	1.15127	-1.39847	no
NP_001241645.1	158048	184083	211456	249728	0.027451	1.35583	218353	230592	200829	1.08726	1.1482	0.0786817	no
NP_001093402.1	80127	84110.6	105728	116502	0.00360159	1.3539	174756	111115	96617	1.80875	1.15006	-0.653287	no
XP_020920624.1	54728.3	58251.2	66913.1	85877.9	0.038515	1.35369	168045	76395.5	66442.6	2.52917	1.1498	-1.13729	no
XP_020942721.1 (+7)	56266.9	60305.4	72214.5	85284.7	0.0152291	1.35271	129999	78749.6	68517.9	1.8973	1.14933	-0.723154	no
XP_003129970.2 (+11)	92041.7	71715.6	103552	114105	0.0435396	1.34994	195594	108829	95353.6	2.05125	1.14132	-0.845805	no
NP_001230517.1 (+2)	60724.9	58656.4	76862.9	84110.6	0.00264555	1.3488	152131	80486.8	70088.7	2.17055	1.14836	-0.918489	no
NP_001092068.1	63303.6	65991.8	89524.8	84695.6	0.00100456	1.34804	96760.1	87110.2	75879	1.27519	1.14802	-0.151571	no
XP_003357134.1 (+2)	55109	55492.3	74244.7	74761.1	2.91708e-06	1.34725	223330	74502.9	64901.8	3.44105	1.14793	-1.58381	no
XP_020951854.1 (+1)	102127	104998	124002	154795	0.0279747	1.34629	145066	139398	121480	1.19415	1.1475	-0.0574921	no
XP_020942625.1 (+1)	80127	93975.7	104273	128375	0.0426782	1.34477	106743	116324	101687	1.04972	1.14393	0.124004	no
XP_005660499.1	62866.3	59064.4	79023.8	84695.6	0.00246588	1.34403	121931	81859.7	71412.5	1.70741	1.14629	-0.574835	no
XP_005661508.1 (+1)	89524.8	80684.3	121450	106464	0.0133124	1.34264	142024	113957	99530.6	1.42694	1.14494	-0.317647	no
XP_020951501.1 (+2)	90147.5	104273	118129	141457	0.0316642	1.34226	177830	129793	113501	1.56676	1.14353	-0.454289	no
XP_001925670.2 (+3)	49667	42642.4	60724.9	62432.1	0.0106801	1.34195	68882.7	61578.5	53866.6	1.27877	1.14317	-0.161716	no
NP_001035834.1 (+1)	131984	135694	204253	154795	0.0498927	1.3416	251761	179524	156682	1.60683	1.14579	-0.487879	no
NP_001231613.1 (+2)	122295	110985	146445	164759	0.0105824	1.33719	154388	155602	136121	1.1342	1.14312	0.0113001	no
NP_999498.1	57848.8	54350.3	83529.6	65991.8	0.0375238	1.33394	149891	74760.7	65430.1	2.29085	1.1426	-1.00356	no
XP_003131105.1 (+1)	190575	265803	286863	305328	0.081582	1.33383	257954	296095	262142	0.984021	1.12952	0.19895	no
XP_020945245.1 (+2)	114898	120611	135694	177813	0.0508244	1.33197	188121	156754	137254	1.3706	1.14207	-0.263163	no
XP_020938633.1	146445	189259	186653	253214	0.11835	1.33195	242395	219934	193893	1.25015	1.13431	-0.140293	no
XP_003361906.3 (+1)	147464	226633	242900	233005	0.135504	1.33179	172470	237952	212500	0.811622	1.11977	0.464327	no
NP_001231527.1 (+1)	171756	147464	189259	233005	0.0443608	1.3305	207863	211132	185371	1.12134	1.13897	0.0225097	no
XP_001927263.3 (+3)	168221	207105	262144	231395	0.0382638	1.32923	218932	246770	217216	1.0079	1.13606	0.172683	no
NP_001182704.1 (+2)	145433	182812	223513	207105	0.037569	1.32911	190507	215309	189716	1.00417	1.1349	0.176562	no
NP_001182050.1	55492.3	66913.1	80684.3	80127	0.0198507	1.3253	115798	80405.6	70804.1	1.63547	1.13561	-0.526239	no
XP_001929053.1	260333	336442	368167	408507	0.0546894	1.32297	312109	388337	343362	0.90898	1.13098	0.315256	no
NP_001230318.1 (+4)	100721	85877.9	113317	131984	0.0312507	1.32296	129645	122650	107975	1.2007	1.13592	-0.0800183	no
XP_020923404.1	62432.1	53231.8	81810.6	70239.7	0.0312507	1.32296	133160	76025.2	66928.5	1.98959	1.13592	-0.808616	no
XP_020953076.1 (+1)	101421	118129	132902	155872	0.0312507	1.32296	144960	144387	127081	1.14069	1.13618	-0.00571273	no
XP_020957268.1	117313	104998	145433	147464	0.00481973	1.32157	158789	146449	128802	1.23282	1.13701	-0.116717	no
XP_020949762.1 (+4)	180295	175365	256749	212927	0.0209904	1.32083	272337	234838	206334	1.31988	1.13815	-0.213725	no
NP_999573.1	38967.9	38431.5	49323.9	52864.1	0.00127808	1.32033	103602	51094	44896.8	2.30755	1.13803	-1.01982	no
XP_003123691.1 (+10)	168221	239555	251465	269514	0.101065	1.31794	192883	260490	232189	0.830716	1.12189	0.433499	no
XP_020932721.1 (+1)	54350.3	64187.3	86475.3	68319	0.0635025	1.31492	73433.3	77397.2	68333	1.07464	1.13265	0.0758464	no
XP_003355570.2	111757	184083	194579	170569	0.202295	1.31274	195286	182574	165247	1.18178	1.10486	-0.0971047	no
NP_001116456.1 (+1)	132902	134757	158048	193235	0.0261333	1.31249	276333	175642	154735	1.78584	1.13511	-0.653774	no
XP_001926294.2	124864	146445	167059	186653	0.0239435	1.31203	189947	176856	156255	1.21562	1.13184	-0.103024	no
NP_001231397.1 (+1)	152664	191901	215899	229797	0.0402211	1.3105	165430	222848	197565	0.837343	1.12797	0.429842	no
NP_998914.1 (+1)	69272.7	50012.5	77397.5	74761.1	0.0860286	1.30973	122137	76079.3	67861	1.79981	1.12111	-0.682922	no
XP_001927992.1	75281.1	72214.5	89524.8	103552	0.0123372	1.3096	139468	96538.6	85143.2	1.63805	1.13384	-0.530761	no
NP_001230485.1	93326.6	101421	119778	134757	0.0108389	1.30926	123479	127267	112321	1.09935	1.13307	0.0435933	no
NP_001231066.1	74761.1	90147.5	103552	110218	0.0255744	1.30768	91605.7	106885	94669.7	0.967635	1.12903	0.222552	no
XP_013850810.2 (+1)	114105	120611	167059	139509	0.0227722	1.30713	259538	153284	135321	1.91795	1.13274	-0.759739	no
XP_001928827.3	100025	103552	134757	131072	0.000356236	1.30618	138724	132914	117352	1.18212	1.13262	-0.061716	no
XP_020956848.1 (+4)	55492.3	57848.8	67847.1	80127	0.0177638	1.30613	101833	73987	65328.8	1.55878	1.13253	-0.460864	no
NP_001335468.1 (+1)	114105	141457	156956	172951	0.0409529	1.30587	168455	164953	146367	1.15091	1.12698	-0.0303069	no
XP_005654823.1	87682.4	87076.8	100721	127488	0.0407228	1.30586	123047	114104	100742	1.2214	1.13264	-0.108852	no
XP_020926051.1 (+1)	82379.6	82952.6	100721	114898	0.00870889	1.30417	190329	107810	95237.8	1.99846	1.132	-0.820013	no
NP_001156532.1	104998	184083	165905	182812	0.242619	1.30388	173792	174359	159450	1.08995	1.0935	0.00469487	no
NP_001038049.1 (+1)	121450	129267	148489	176585	0.0227961	1.29784	183882	162537	143948	1.27742	1.12914	-0.178011	no
XP_020933261.1 (+2)	44146.1	49323.9	54350.3	66450.8	0.0407774	1.29638	219511	60400.6	53567.8	4.09782	1.12755	-1.86166	no
XP_001927782.1	44453.2	38166	52498.9	53974.9	0.0144457	1.29624	101112	53236.9	47273.2	2.13887	1.12615	-0.925449	no
XP_003359097.3 (+6)	209996	167059	226633	254976	0.0547138	1.29407	262495	240804	214666	1.2228	1.12176	-0.124426	no
XP_005659919.2	296979	286863	394591	360590	0.00385899	1.29386	339621	377591	334756	1.01453	1.12796	0.152897	no
XP_020936322.1 (+3)	130167	130167	132902	201441	0.158209	1.28429	172809	167172	148669	1.16237	1.12445	-0.0478494	no
XP_003124995.1 (+6)	39511.9	25531.7	41189.8	38431.5	0.177381	1.28341	78479.8	39810.6	36166.2	2.16998	1.10077	-0.979168	no
XP_003125781.1	112534	105728	132902	146445	0.00710793	1.28111	172839	139673	124402	1.38936	1.12276	-0.307374	no
XP_020942985.1	109457	128375	142441	160254	0.0312802	1.28083	176835	151347	135131	1.30862	1.12	-0.224543	no
NP_001121907.1	60305.4	60305.4	70728.3	83529.6	0.0198602	1.27897	95425.3	77129	68717.2	1.38867	1.12241	-0.307099	no
XP_020929490.1 (+7)	33456.5	33689.2	40342.1	45387.3	0.0078336	1.27678	94181.4	42864.7	38218.8	2.46427	1.12156	-1.13565	no
XP_020950132.1	218913	290867	336442	301124	0.0902093	1.27609	259819	318783	286837	0.905806	1.11138	0.295072	no
NP_999562.1	73222.5	77397.5	93975.7	97966.4	0.00170266	1.27533	100777	95971.1	85640.5	1.17674	1.12063	-0.0704953	no
XP_005656635.3 (+49)	95287.5	92681.9	121450	118129	0.000316112	1.27481	133986	119789	106887	1.25353	1.12071	-0.161587	no
NP_001231082.1	97289.7	108701	123145	138545	0.0192045	1.27431	156765	130845	116920	1.34079	1.1191	-0.260741	no
XP_005657422.2 (+12)	68319	70728.3	95287.5	81810.6	0.0174764	1.27404	91170.5	88549.1	79036.4	1.15353	1.12036	-0.0420902	no
XP_005672193.1 (+4)	189259	215899	246290	267652	0.0173467	1.27401	211952	256971	229775	0.922434	1.11836	0.277867	no
XP_003361974.2	114898	137588	148489	170569	0.0464651	1.27395	136220	159529	142886	0.953342	1.11648	0.227888	no
XP_020918816.1 (+3)	118129	124864	145433	163621	0.0106777	1.27285	151585	154527	138012	1.09835	1.11967	0.0277329	no
NP_001098767.1	327242	350730	408507	453266	0.00953524	1.27263	377953	430887	384936	0.981859	1.11937	0.189101	no
NP_001123720.1 (+1)	158048	113317	205674	130167	0.279228	1.27217	206693	167920	151801	1.3616	1.10619	-0.299709	no
XP_003123198.2	116502	104998	143431	137588	0.00701462	1.27214	179806	140510	125630	1.43123	1.11844	-0.35577	no
XP_020925090.1 (+4)	85284.7	85284.7	116502	100025	0.0169098	1.26944	151277	108264	96774.2	1.56319	1.11872	-0.48264	no
NP_001231402.1	95287.5	85284.7	108701	119778	0.015502	1.2692	147424	114239	102263	1.44162	1.11712	-0.367913	no
NP_001038023.1 (+3)	100721	77935.9	105728	117313	0.0760936	1.26908	238309	111520	100424	2.37302	1.11049	-1.09553	no
NP_999159.1	106464	120611	142441	144429	0.00998521	1.26825	158962	143435	128486	1.2372	1.11635	-0.148292	no
NP_001090946.2 (+1)	121450	134757	175365	148489	0.0335817	1.26745	250717	161927	145015	1.7289	1.11662	-0.630717	no
XP_013853667.2 (+1)	72214.5	70239.7	98647.9	81810.6	0.030538	1.26703	168832	90229.2	80728.2	2.09137	1.11769	-0.903923	no
XP_020926395.1	154795	121450	174154	170569	0.0573656	1.26634	183719	172361	155242	1.18344	1.11028	-0.0920671	no
NP_999136.1 (+8)	87682.4	81810.6	100025	114105	0.0164697	1.26487	148830	107065	95905.7	1.55183	1.11636	-0.475177	no
XP_020930409.1	51063.3	55109	60305.4	73731.8	0.0432114	1.26429	75050.9	67018.6	60052.4	1.24976	1.116	-0.163307	no
XP_020938896.1 (+1)	84695.6	77397.5	100025	104273	0.00537123	1.26293	114640	102149	91597.7	1.25156	1.11519	-0.16644	no
XP_001927840.1	116502	118950	135694	161369	0.0257822	1.2618	153368	148531	133129	1.15203	1.1157	-0.0462324	no
NP_001004047.1 (+8)	52864.1	45703	59064.4	64633.7	0.0246448	1.26162	88474.2	61849	55566.3	1.59223	1.11307	-0.516505	no
XP_013854859.1 (+3)	51776.1	45387.3	62432.1	59475.2	0.0145777	1.26011	75930.6	60953.6	54767.7	1.38641	1.11295	-0.316969	no
XP_020923664.1 (+10)	52498.9	42642.4	58251.2	60305.4	0.0425141	1.25963	107227	59278.3	53424.5	2.00708	1.10957	-0.855095	no
NP_999063.1	73731.8	66913.1	85284.7	91405.9	0.00935202	1.25925	149537	88345.3	79333.9	1.8849	1.11359	-0.759272	no
XP_020936880.1 (+1)	96617.7	101421	118950	130167	0.00608935	1.25866	157343	124558	111789	1.4075	1.11423	-0.337086	no
NP_001230725.1	94629.3	97289.7	116502	124864	0.00246113	1.25789	181105	120683	108321	1.67192	1.11412	-0.585598	no
XP_003134313.1	140479	126607	171756	162491	0.00939103	1.25484	156196	167123	150333	1.039	1.11169	0.0975558	no
NP_001128440.1 (+4)	103552	131984	140479	150562	0.0683367	1.25393	126723	145521	131644	0.962614	1.10541	0.19955	no
XP_020920464.1	108701	104273	145433	121450	0.0320314	1.25367	168589	133442	119964	1.40533	1.11235	-0.337305	no
NP_001230474.1 (+2)	234625	275177	307452	327242	0.0264114	1.25291	255220	317347	286124	0.891992	1.10912	0.314318	no
XP_003127605.2	95287.5	104998	132902	117313	0.0215511	1.25223	133986	125107	112625	1.18967	1.11083	-0.0989207	no
XP_001925699.2 (+1)	185364	258535	242900	296979	0.17131	1.25019	245669	269939	245944	0.998882	1.09756	0.135917	no
NP_999441.1 (+2)	161369	193235	218913	220436	0.0311406	1.24907	196979	219675	198488	0.992394	1.10674	0.157329	no
XP_020920570.1	58251.2	57848.8	74244.7	70728.3	0.000776033	1.24871	239800	72486.5	65268.2	3.67407	1.11059	-1.72605	no
XP_013852278.1 (+1)	108701	122295	130167	156956	0.0529121	1.2473	173784	143561	129529	1.34166	1.10833	-0.275628	no
XP_003483583.1	59064.4	47975.2	66450.8	65536	0.0457969	1.24644	88392.5	65993.4	59756.6	1.47921	1.10437	-0.421602	no
NP_001038077.1	69272.7	59888.9	85284.7	74761.1	0.0399945	1.24569	109895	80022.9	72301.9	1.51995	1.10679	-0.457647	no
NP_001161122.1	107950	73731.8	110985	107204	0.169258	1.24511	144057	109094	99967.6	1.44104	1.0913	-0.401063	no
XP_020953196.1	62866.3	71220.3	72716.7	93326.6	0.0928669	1.24315	123591	83021.6	75032.5	1.64717	1.10648	-0.574017	no
NP_001231321.1 (+2)	54728.3	48308.9	61572.6	65991.8	0.0177489	1.24287	147410	63782.2	57650.4	2.55697	1.10636	-1.20861	no
XP_001926332.2	95287.5	109457	124864	128375	0.0172661	1.24281	150016	126619	114496	1.31023	1.10589	-0.244617	no
NP_001138374.1	165905	151609	159147	234625	0.184612	1.24269	204071	196886	177822	1.14762	1.10721	-0.0517109	no
XP_020942248.1 (+1)	75281.1	121450	93326.6	137588	0.350814	1.24217	102645	115458	106911	0.960096	1.07994	0.169695	no
XP_005662019.1	163621	172951	202842	214408	0.00334008	1.24066	244867	208625	188456	1.29933	1.10703	-0.231082	no
NP_001072156.1 (+1)	44146.1	31433.2	42055.3	48983.2	0.168138	1.23962	141436	45519.3	41654.5	3.39546	1.09278	-1.6356	no
NP_001254763.1	55878.3	46341	66450.8	59064.4	0.0566778	1.23869	130123	62757.6	56933.6	2.28552	1.10229	-1.05201	no
XP_020921984.1	104998	119778	134757	142441	0.0184979	1.23857	152642	138599	125493	1.21633	1.10443	-0.139234	no
XP_020939217.1	53602	41189.8	57848.8	57449.2	0.0848171	1.23755	97748.2	57649	52522.5	1.86107	1.09761	-0.761774	no
XP_013852742.1 (+1)	83529.6	77397.5	103552	95287.5	0.00976547	1.23739	207531	99419.9	89941.7	2.3074	1.10538	-1.06172	no
XP_003481218.3 (+6)	114105	120611	132902	156956	0.032509	1.23588	207431	144929	131143	1.58172	1.10512	-0.51729	no
XP_020946202.1	78478	71220.3	93975.7	90147.5	0.00845212	1.23286	126122	92061.6	83455.4	1.51125	1.10312	-0.454146	no
XP_020936350.1 (+8)	431799	363098	440872	531607	0.0828609	1.23261	485031	486239	441844	1.09774	1.10048	0.00359069	no
XP_020942313.1	130167	130167	175365	145433	0.0395106	1.23226	171643	160399	145283	1.18144	1.10405	-0.0977438	no
XP_001928957.1 (+11)	69272.7	58656.4	69272.7	87076.8	0.105127	1.23063	92930.1	78174.7	71069.6	1.30759	1.09997	-0.249443	no
XP_003122543.3 (+2)	86475.3	81245.5	92041.7	114105	0.0621394	1.2303	97284.7	103073	93466.8	1.04085	1.10278	0.0833855	no
XP_020954976.1	79573.5	72214.5	97289.7	88906.4	0.0164032	1.22958	125594	93098.1	84496	1.48639	1.1018	-0.431948	no
XP_020947967.1	90147.5	121450	120611	133826	0.131671	1.22936	133686	127218	116509	1.14743	1.09192	-0.071539	no
NP_001230593.1 (+3)	152664	185364	207105	204253	0.0450255	1.22843	228996	205679	187346	1.22231	1.09785	-0.154928	no
XP_003131683.1 (+1)	110218	109457	129267	140479	0.00453726	1.22795	149730	134873	122355	1.22373	1.10231	-0.150755	no
XP_020946207.1	102127	76332	105728	108701	0.114298	1.2272	156855	107214	98221.8	1.59695	1.09155	-0.548933	no
NP_001106484.1 (+8)	54728.3	54728.3	57449.2	76862.9	0.1133	1.22708	139424	67156.1	60942.2	2.28781	1.10196	-1.05389	no
XP_003356895.2	124002	162491	152664	191901	0.16996	1.22481	165766	172282	157764	1.05072	1.09202	0.0556223	no
NP_001131100.1	207105	194579	223513	267652	0.0447082	1.22396	280836	245583	223212	1.25816	1.10022	-0.193521	no
NP_001121909.1 (+1)	137588	148489	143431	205674	0.182943	1.22209	172708	174553	158796	1.08761	1.09923	0.0153244	no
XP_020947538.1 (+2)	111757	95287.5	117313	133826	0.056293	1.2207	154399	125569	114546	1.34792	1.09624	-0.298178	no
NP_999414.1 (+1)	104273	88292.3	123145	110218	0.0520571	1.22027	148419	116682	106482	1.39384	1.09579	-0.347096	no
XP_020940820.1	209996	248003	286863	267652	0.0406349	1.21913	252051	277257	253128	0.995743	1.09532	0.13751	no
XP_003359184.2	162491	186653	190575	233005	0.0837954	1.21903	308936	211790	193181	1.59921	1.09633	-0.544674	no
XP_005656108.2	93326.6	95287.5	112534	117313	0.000903997	1.21874	157070	114923	104615	1.50141	1.09853	-0.450741	no
XP_020945631.1	102127	106464	116502	137588	0.0359454	1.21866	143603	127045	115670	1.24149	1.09834	-0.176741	no
XP_020947197.1	82952.6	82952.6	102837	99334	0.000378253	1.21859	134371	101086	92019.1	1.46025	1.09853	-0.410647	no
XP_001929258.1 (+2)	58656.4	47314.7	61147.3	66450.8	0.073885	1.21804	85643.8	63799	58392.3	1.4667	1.09259	-0.424814	no
XP_020936710.1	34636.4	21618.8	29944.4	34877.3	0.29464	1.21747	91294.7	32410.9	30269.2	3.01609	1.07075	-1.49405	no
XP_020928188.1	81810.6	92041.7	102837	107950	0.0167808	1.21666	115970	105393	96159.8	1.20602	1.09602	-0.137969	no
NP_001230504.1 (+1)	97966.4	87076.8	114105	110218	0.0151937	1.21649	122121	112161	102341	1.19327	1.09595	-0.122734	no
XP_003131991.2 (+2)	137588	152664	179050	172951	0.0111457	1.21602	155027	176000	160563	0.965521	1.09614	0.183056	no
XP_003126994.1	87076.8	79023.8	109457	92041.7	0.0532305	1.21597	126316	100749	91899.7	1.3745	1.09629	-0.326266	no
NP_001032228.1	99334	109457	127488	125733	0.00817611	1.21565	180018	126610	115503	1.55856	1.09617	-0.507749	no
NP_001231917.1	162491	169391	177813	225068	0.082707	1.21445	217983	201440	183691	1.18669	1.09663	-0.113865	no
XP_003357750.1	71220.3	83529.6	94629.3	92041.7	0.0324338	1.21396	105617	93335.5	85355.2	1.23739	1.0935	-0.178349	no
XP_020949519.1	126607	147464	164759	165905	0.0279979	1.21352	196362	165332	151184	1.29883	1.09358	-0.248146	no
XP_020936413.1	84110.6	70239.7	82952.6	102837	0.11787	1.21349	141959	92894.8	85035	1.66942	1.09243	-0.611809	no
XP_001928988.1	82379.6	85284.7	95287.5	107950	0.0182836	1.21253	162507	101619	92725.4	1.75256	1.09591	-0.677333	no
NP_001182266.1	72214.5	88292.3	95287.5	97289.7	0.0573095	1.21197	117917	96288.6	88271	1.33586	1.09083	-0.292339	no
XP_005653947.1	68794.2	84110.6	92041.7	91405.9	0.0566844	1.21191	101790	91723.8	84088.1	1.21052	1.09081	-0.15023	no
NP_998994.2	301124	292890	375903	343512	0.00767958	1.21134	319053	359707	328357	0.971665	1.09548	0.173026	no
NP_001007112.1 (+4)	79573.5	127488	103552	133826	0.338371	1.21128	99193	118689	111110	0.892746	1.06821	0.258879	no
XP_003128181.1	125733	82952.6	112534	129267	0.260421	1.20952	158958	120901	112622	1.41143	1.07351	-0.394824	no
NP_001038000.1 (+1)	104998	102837	120611	130167	0.00488713	1.20675	210726	125389	114653	1.83794	1.09364	-0.748961	no
XP_020943521.1	57449.2	53974.9	68319	65991.8	0.00364904	1.20658	106773	67155.4	61433.7	1.73802	1.09314	-0.668973	no
NP_999092.1	125733	113317	134757	152664	0.0357736	1.2056	219059	143710	131618	1.66436	1.09188	-0.608156	no
XP_013851951.1	62432.1	68319	74244.7	82952.6	0.0259094	1.20471	97552	78598.7	71987.1	1.35513	1.09184	-0.311666	no
XP_013851782.2	57848.8	48308.9	57449.2	69272.7	0.109381	1.20343	94460.1	63361	58219.9	1.62247	1.0883	-0.57611	no
XP_003357180.1	47314.7	34877.3	47643.8	48983.2	0.149953	1.20318	79408.3	48313.5	44704.7	1.77628	1.08072	-0.716864	no
NP_001231092.1 (+1)	82379.6	78478	92681.9	100721	0.00896342	1.20303	106871	96701.3	88565	1.2067	1.09187	-0.144267	no
XP_020940362.1	147464	161369	185364	185364	0.00743447	1.20286	191305	185364	169890	1.12605	1.09108	-0.0455141	no
NP_999093.1	119778	110985	137588	139509	0.0048511	1.20254	161254	138549	126965	1.27007	1.09124	-0.218941	no
XP_020929711.1	69272.7	68794.2	76332	89524.8	0.0356121	1.20129	108785	82928.4	75980.9	1.43174	1.09144	-0.391537	no
XP_003480670.1	115698	139509	144429	159147	0.0711816	1.19998	170426	151788	139696	1.21998	1.08656	-0.167088	no
XP_003131697.1 (+4)	130167	115698	144429	149522	0.0182229	1.19974	173106	146976	134954	1.2827	1.08908	-0.236076	no
XP_003130704.1	136638	160254	160254	193235	0.101901	1.19821	199942	176745	162595	1.22969	1.08702	-0.177913	no
XP_001929445.4	102837	91405.9	105728	125733	0.0732555	1.19575	120155	115730	106426	1.129	1.08743	-0.054131	no
XP_003127573.6 (+1)	61147.3	65991.8	72214.5	79573.5	0.0193878	1.19561	125335	75894	69731.8	1.79738	1.08837	-0.723727	no
XP_003130105.4 (+1)	47975.2	35857.8	46341	51776.1	0.16528	1.19536	117248	49058.5	45487.5	2.57758	1.07851	-1.25699	no
NP_001182048.1	53231.8	39239	52498.9	55492.3	0.163332	1.19521	88109.1	53995.6	50115.5	1.75812	1.07742	-0.706448	no
XP_020957372.1 (+2)	59475.2	66450.8	75281.1	74761.1	0.0146086	1.19518	156765	75021.1	68992.1	2.27222	1.08739	-1.06323	no
XP_005670843.2	234625	211456	262144	269514	0.0133976	1.19506	263954	265829	244435	1.07985	1.08752	0.0102136	no
NP_001033089.1	85877.9	98647.9	97966.4	121450	0.113889	1.1948	101595	109708	100985	1.00603	1.08637	0.110847	no
XP_020954089.1	223513	186653	236257	249728	0.0577688	1.1945	238382	242993	224038	1.06402	1.08461	0.0276392	no
XP_003481320.2	72214.5	70239.7	80127	89524.8	0.0165693	1.19115	91833.9	84825.9	78026.5	1.17696	1.08714	-0.114523	no
XP_003122482.1 (+3)	87682.4	73222.5	83529.6	106464	0.163675	1.19039	132756	94996.6	87724.5	1.51333	1.0829	-0.482832	no
XP_020924720.1 (+6)	68794.2	64187.3	80684.3	77397.5	0.0063715	1.19018	161476	79040.9	72765.8	2.21912	1.08624	-1.03065	no
XP_020934852.1	70728.3	48983.2	62432.1	75281.1	0.270587	1.18963	100881	68856.6	64356.2	1.56754	1.06993	-0.550988	no
XP_020948433.1	120611	87682.4	115698	125733	0.191262	1.1888	152263	120715	112431	1.35428	1.07368	-0.334955	no
NP_001070681.1	90774.5	82952.6	96617.7	109457	0.0374709	1.1886	132830	103037	94950.4	1.39894	1.08517	-0.366414	no
XP_020929346.1	65991.8	79023.8	80127	90774.5	0.0873666	1.1881	97643.6	85450.7	78979.3	1.23632	1.08194	-0.192433	no
NP_001231006.1	131072	109457	146445	136638	0.0664455	1.1865	168974	141542	130903	1.29084	1.08127	-0.255579	no
NP_001106518.1 (+3)	115698	85877.9	115698	118129	0.16448	1.18595	153600	116913	108850	1.41111	1.07407	-0.393741	no
XP_020957075.1	104998	126607	125733	146445	0.110235	1.1855	150701	136089	125946	1.19655	1.08054	-0.147138	no
NP_999046.1	35119.9	34636.4	42055.3	40622.7	0.000709854	1.1853	57971.4	41339	38108.6	1.52122	1.08477	-0.487836	no
XP_020938589.1	113317	128375	134757	150562	0.0477647	1.18511	177950	142660	131753	1.35064	1.08278	-0.318898	no
XP_020950042.1	145433	138545	158048	177813	0.0243869	1.18339	180553	167930	154960	1.16516	1.0837	-0.104563	no
XP_005661752.1	74244.7	69754.6	82379.6	87682.4	0.00905689	1.18214	140237	85031	78515.3	1.7861	1.08299	-0.721801	no
NP_001177351.1	209996	194579	194579	282913	0.253155	1.18195	272862	238746	220517	1.23737	1.08267	-0.192693	no
XP_003125038.1	72716.7	58656.4	78478	74761.1	0.0953206	1.17996	165399	76619.5	71153	2.32455	1.07683	-1.11016	no
XP_020923393.1 (+2)	51063.3	31433.2	44762.4	46987.8	0.352166	1.17892	77679.2	45875.1	43561.7	1.7832	1.05311	-0.759817	no
NP_001034835.1	33456.5	29737.6	31872	42347.8	0.185148	1.17855	84875	37109.9	34353.5	2.47064	1.08024	-1.19354	no
XP_020919973.1 (+1)	46987.8	39239	50710.6	50012.5	0.0625797	1.17763	210609	50361.5	46737.5	4.50621	1.07754	-2.06417	no
XP_003133833.1	65083.3	90147.5	81245.5	96617.7	0.252135	1.17647	131996	88931.6	83273.5	1.58509	1.06795	-0.56973	no
XP_020948717.1 (+2)	152664	185364	185364	208545	0.10596	1.17632	185889	196954	182984	1.01588	1.07635	0.0834177	no
NP_001231332.1 (+1)	49323.9	60305.4	60724.9	66913.1	0.102346	1.17607	122041	63819	59316.8	2.05744	1.0759	-0.935305	no
NP_001090944.2	66450.8	63303.6	71220.3	81245.5	0.0344508	1.17572	119683	76232.9	70555	1.6963	1.08047	-0.650729	no
XP_003135174.1 (+1)	98647.9	84110.6	100025	113317	0.0841427	1.17477	152998	106671	99025	1.54505	1.07721	-0.520349	no
XP_003131863.2 (+1)	57052.4	63303.6	71220.3	69754.6	0.0166581	1.17448	94692.9	70487.4	65332.7	1.4494	1.0789	-0.425891	no
NP_999184.2	71220.3	75804.7	84110.6	88292.3	0.00742985	1.17375	90040.5	86201.4	79857	1.12752	1.07945	-0.0628624	no
NP_001038076.1	80127	75804.7	88906.4	93975.7	0.00727002	1.17374	235999	91441.1	84703.4	2.78618	1.07954	-1.36786	no
XP_020923109.1	84695.6	91405.9	103552	102837	0.00678609	1.17369	152074	103195	95622.7	1.59036	1.07919	-0.559406	no
XP_020941844.1	83529.6	45703	60724.9	77935.9	0.482087	1.17349	118649	69330.4	66973.3	1.77159	1.03519	-0.775146	no
XP_005669704.1 (+2)	137588	129267	158048	154795	0.00440332	1.17347	180826	156421	144925	1.24772	1.07933	-0.209165	no
XP_003126763.1	60724.9	70239.7	73222.5	79573.5	0.0555043	1.17289	135486	76398	70940.2	1.90986	1.07694	-0.826537	no
NP_999396.2 (+5)	129267	131984	135694	170569	0.112254	1.17242	153089	153132	141879	1.07902	1.07932	0.0004003	no
XP_013849955.2 (+1)	101421	125733	134757	128375	0.103705	1.17181	130146	131566	122571	1.0618	1.07338	0.0156549	no
XP_020942022.1	236257	185364	228210	258535	0.15919	1.17153	326405	243372	227091	1.43733	1.07169	-0.423498	no
NP_001116663.1 (+4)	71220.3	53231.8	85284.7	57449.2	0.376009	1.17137	115673	71367	66796.5	1.73173	1.06842	-0.696729	no
NP_001177104.1	75281.1	102837	99334	104273	0.204565	1.17113	126700	101803	95431.2	1.32765	1.06677	-0.315628	no
XP_003480823.2	286863	327242	318294	397336	0.145067	1.17038	331936	357815	332434	0.998504	1.07635	0.108307	no
XP_003359363.1	162491	133826	147464	195933	0.2392	1.16983	285636	171698	159928	1.78602	1.07359	-0.734303	no
NP_001027548.1 (+2)	67847.1	66450.8	76332	80684.3	0.0034548	1.16929	124114	78508.1	72828.6	1.7042	1.07799	-0.660753	no
XP_020954128.1	99334	145433	127488	148489	0.30653	1.16897	149694	137989	130186	1.14985	1.05993	-0.117471	no
XP_005674521.2	105728	106464	114898	132902	0.0417773	1.16783	144427	123900	114998	1.25591	1.07741	-0.221163	no
NP_999105.1	133826	108701	134757	145433	0.109577	1.16783	182471	140095	130679	1.39633	1.07205	-0.381259	no
XP_020918086.1	72716.7	75281.1	77397.5	95287.5	0.0992838	1.16716	147998	86342.5	80170.7	1.84603	1.07698	-0.777433	no
XP_001927901.1	46987.8	37640.5	43538.4	53974.9	0.207354	1.16648	154192	48756.6	45535.4	3.3862	1.07074	-1.66106	no
XP_020933879.1	301124	311744	341139	373306	0.0144755	1.16609	363125	357223	331828	1.09432	1.07653	-0.0236438	no
NP_999176.1	124864	134757	153726	148489	0.00980195	1.16576	156080	151108	140459	1.11121	1.07581	-0.0467115	no
XP_020949610.1	70728.3	70239.7	74761.1	89524.8	0.0717138	1.16543	105125	82143	76313.5	1.37755	1.07639	-0.355903	no
XP_020922644.1 (+3)	83529.6	86475.3	90774.5	107204	0.0629272	1.1649	134948	98989.3	91995.9	1.46689	1.07602	-0.44706	no
NP_001173223.1	122295	149522	140479	172951	0.188462	1.16478	211819	156715	146312	1.44773	1.0711	-0.434691	no
NP_001177148.1 (+2)	52498.9	47643.8	54728.3	61572.6	0.0493406	1.16409	88606.1	58150.4	54110.9	1.63749	1.07465	-0.607617	no
XP_013835993.2	64633.7	57449.2	64187.3	77397.5	0.114436	1.16377	98323	70792.4	65917	1.49162	1.07396	-0.473934	no
NP_001265708.1 (+1)	149522	180295	181549	198668	0.101174	1.16294	270133	190109	177509	1.5218	1.07098	-0.506847	no
XP_013844650.2	83529.6	88906.4	90774.5	109457	0.0910511	1.16232	112056	100116	93166.8	1.20274	1.07458	-0.162551	no
XP_020925062.1	93326.6	102837	104273	123145	0.0868587	1.16206	140641	113709	105895	1.32812	1.07379	-0.306675	no
XP_003356782.2	90147.5	90147.5	100025	109457	0.0127087	1.16188	106532	104741	97444.1	1.09326	1.07488	-0.0244569	no
XP_003355292.1	163621	246290	237901	218913	0.326611	1.16167	299315	228407	216681	1.38136	1.05411	-0.39006	no
NP_001172071.1	120611	112534	133826	136638	0.00691011	1.16146	146679	135232	125902	1.16502	1.0741	-0.117225	no
XP_003131608.4 (+3)	98647.9	100721	106464	124864	0.0583725	1.16043	156097	115664	107674	1.44972	1.0742	-0.432505	no
NP_001177126.1	84695.6	77397.5	84695.6	102837	0.112142	1.15929	141354	93766.3	87406.5	1.6172	1.07276	-0.59217	no
NP_001335901.1	110218	97289.7	118950	120611	0.0322284	1.15897	153456	119781	111767	1.37299	1.0717	-0.357427	no
NP_001138398.2	168221	150562	162491	205674	0.16563	1.15846	234672	184082	171737	1.36646	1.07189	-0.350294	no
XP_020917920.1 (+5)	215899	214408	239555	258535	0.00860658	1.15754	267676	249045	232099	1.15328	1.07301	-0.104078	no
NP_999127.1	113317	124002	147464	126607	0.0763895	1.15721	147240	137035	127847	1.15169	1.07187	-0.103622	no
XP_003481157.2	80684.3	62432.1	76862.9	85877.9	0.191913	1.15592	131395	81370.4	76464.3	1.71838	1.06416	-0.691333	no
XP_020931922.1 (+1)	70728.3	68794.2	76862.9	84110.6	0.0162213	1.15397	95390.3	80486.8	75124	1.26977	1.07139	-0.245091	no
NP_001127827.1 (+1)	110985	102837	122295	124002	0.00948101	1.15355	180257	123148	115029	1.56705	1.07058	-0.549664	no
NP_999227.1	169391	179050	200050	201441	0.00375005	1.15314	188082	200746	187483	1.00319	1.07074	0.0940099	no
XP_003131834.2	73731.8	72214.5	77397.5	90774.5	0.0648215	1.15241	88294.6	84086	78529.6	1.12435	1.07076	-0.0704595	no
XP_020942457.1	70239.7	67378.5	73222.5	85284.7	0.0624447	1.15229	117554	79253.6	74031.4	1.5879	1.07054	-0.56878	no
XP_003135545.1 (+2)	258535	241222	271388	303219	0.0400707	1.15116	319682	287304	268591	1.19022	1.06967	-0.154062	no
XP_003357085.1 (+3)	77935.9	57052.4	76862.9	74761.1	0.240174	1.15078	107468	75812	71653.1	1.49984	1.05804	-0.50341	no
XP_003132702.1 (+2)	88292.3	94629.3	100721	109457	0.0248976	1.15038	150293	105089	98274.7	1.52932	1.06934	-0.516172	no
NP_001231022.1 (+4)	33456.5	32768	37640.5	38431.5	0.000611155	1.14882	153234	38036	35574.1	4.30746	1.0692	-2.0103	no
XP_020946444.1 (+1)	389159	271388	331810	402883	0.351011	1.14877	416713	367347	348810	1.19467	1.05314	-0.181914	no
XP_001928380.1	47643.8	52136.3	53231.8	61147.3	0.072988	1.14864	83501.6	57189.5	53539.8	1.55962	1.06817	-0.546053	no
XP_020953249.1	114898	114898	121450	142441	0.0671143	1.14836	152539	131945	123422	1.23592	1.06906	-0.20924	no
XP_020922497.1	106464	113317	119778	131984	0.0311262	1.14663	134793	125881	117885	1.14342	1.06782	-0.0986853	no
NP_001192208.1	80684.3	86475.3	91405.9	100025	0.0299988	1.14657	122740	95715.4	89647.6	1.36913	1.06769	-0.358777	no
XP_013837830.2	121450	132902	150562	140479	0.0299988	1.14657	145941	145521	136348	1.07036	1.06727	-0.00416302	no
NP_001172101.1	101421	103552	102837	131984	0.175094	1.14574	191569	117410	109949	1.74235	1.06787	-0.706303	no
XP_003127871.2	72716.7	67847.1	74244.7	86475.3	0.0791148	1.14477	104369	80360	75321	1.38565	1.0669	-0.377138	no
XP_020924364.1 (+11)	106464	101421	109457	128375	0.0781529	1.14473	134597	118916	111429	1.20792	1.06719	-0.178708	no
NP_001231060.1	57449.2	49323.9	62000.8	59475.2	0.0696483	1.14433	81603.7	60738	57062.3	1.43008	1.06442	-0.426034	no
NP_001132944.1	120611	138545	142441	152664	0.0667901	1.14419	214587	147552	138565	1.54863	1.06486	-0.540334	no
NP_999232.1 (+27)	37122.3	37380.5	39511.9	45703	0.0579598	1.14379	64486.5	42607.4	39929.4	1.61501	1.06707	-0.597892	no
NP_001230731.1	25531.7	29125.6	36107.2	26068.1	0.304162	1.14249	66154.4	31087.7	29208.2	2.26493	1.06435	-1.08949	no
NP_001231558.1	87682.4	94629.3	95287.5	112534	0.100217	1.14158	231114	103911	97533.3	2.36959	1.06539	-1.15326	no
NP_999204.1	118129	122295	133826	140479	0.00554009	1.14127	180130	137153	128682	1.3998	1.06583	-0.393251	no
XP_003353801.2 (+6)	57848.8	59064.4	65083.3	68319	0.0039068	1.14116	108209	66701.2	62578.9	1.72916	1.06587	-0.698038	no
XP_020918268.1	102837	124002	123145	132902	0.127572	1.13867	139959	128023	120721	1.15936	1.06049	-0.1286	no
NP_001183950.1	246290	239555	263967	288858	0.020983	1.13808	288638	276413	259668	1.11157	1.06449	-0.0624383	no
XP_003356508.3	65991.8	55109	74244.7	62432.1	0.19169	1.13781	103372	68338.4	64444.4	1.60406	1.06042	-0.597083	no
NP_001230751.1	74244.7	71715.6	80127	85877.9	0.012382	1.13767	136246	83002.4	77991.3	1.74693	1.06425	-0.714983	no
NP_001090982.1	73731.8	75281.1	72214.5	97289.7	0.252546	1.13764	106500	84752.1	79629.3	1.33745	1.06433	-0.32953	no
NP_001116634.1	75281.1	56658.3	80127	66913.1	0.301675	1.1371	204549	73520	69744.9	2.93281	1.05413	-1.47623	no
XP_020925470.1	102127	84110.6	88292.3	121450	0.343877	1.13685	154263	104871	98994.8	1.55829	1.05936	-0.556775	no
XP_001928912.1	49323.9	48983.2	55492.3	55878.3	3.08909e-05	1.1329	65594.8	55685.3	52419.4	1.25134	1.0623	-0.236284	no
NP_001171399.1	201441	180295	182812	248003	0.299287	1.13204	248756	215408	203138	1.22457	1.0604	-0.207662	no
XP_003357800.1 (+1)	77397.5	63303.6	79023.8	78478	0.139565	1.13075	112275	78750.9	74550.7	1.50602	1.05634	-0.511666	no
NP_001302639.1 (+1)	84110.6	56266.9	84110.6	68319	0.439634	1.13032	158355	76214.8	73201.8	2.16327	1.04116	-1.05502	no
NP_999125.1 (+4)	51776.1	48308.9	54728.3	58251.2	0.0234353	1.13019	111251	56489.8	53266.1	2.08859	1.06052	-0.977761	no
XP_001927373.4	175365	187951	201441	208545	0.0142903	1.12981	256049	204993	193326	1.32444	1.06035	-0.320844	no
XP_005663205.1	57848.8	54728.3	64187.3	62866.3	0.00676727	1.12946	78731.2	63526.8	59907.7	1.31421	1.06041	-0.30957	no
XP_001927714.1 (+10)	88906.4	81245.5	76862.9	114898	0.401889	1.12929	118439	95880.7	90478.3	1.30903	1.05971	-0.304827	no
XP_020956671.1	280959	286863	345901	294927	0.0907275	1.1287	304947	320414	302162	1.00921	1.0604	0.0713817	no
NP_001138857.1	95950.3	124002	120611	123145	0.22573	1.12655	170711	121878	115927	1.47258	1.05133	-0.486122	no
XP_003133631.5 (+12)	83529.6	100721	103552	102127	0.129859	1.12611	124719	102839	97482.3	1.27941	1.05496	-0.278292	no
NP_001231647.1 (+10)	65991.8	74244.7	75804.7	81245.5	0.0682722	1.12379	101602	78525.1	74321.7	1.36706	1.05656	-0.371703	no
NP_999148.1 (+1)	88906.4	84695.6	92041.7	102837	0.0516103	1.12322	125014	97439.4	92120.2	1.35707	1.05774	-0.359509	no
XP_003122857.1 (+1)	80127	74761.1	84695.6	88906.4	0.0210135	1.12217	126468	86801	82122.5	1.53999	1.05697	-0.542987	no
XP_001926371.3 (+3)	104998	124002	122295	132902	0.135397	1.12212	142378	127598	121049	1.17621	1.0541	-0.158123	no
XP_003131796.1 (+3)	78478	65536	79573.5	80684.3	0.128117	1.12185	134745	80128.9	76067.9	1.77138	1.05339	-0.749837	no
XP_020923182.1	186653	258535	234625	251465	0.339812	1.12111	248654	243045	232820	1.06801	1.04392	-0.0329135	no
XP_005664641.1	90147.5	104273	111757	104998	0.0993886	1.12079	151295	108377	102794	1.47183	1.05432	-0.481301	no
NP_001231673.1	35857.8	32541.7	36611.3	39786.7	0.0627452	1.11957	135883	38199	36199.4	3.75373	1.05524	-1.83076	no
XP_020941494.1 (+3)	79023.8	94629.3	91405.9	101421	0.173316	1.11946	125365	96413.6	91620.1	1.36831	1.05232	-0.378824	no
NP_001230503.1	77397.5	69754.6	84695.6	79573.5	0.0555499	1.11934	152679	82134.6	77855.3	1.96106	1.05496	-0.894437	no
XP_020922488.1	154795	148489	177813	161369	0.0398538	1.11884	195137	169591	160616	1.21493	1.05587	-0.202432	no
NP_001177113.1	101421	118950	110218	134757	0.246971	1.11872	138802	122487	116337	1.1931	1.05287	-0.180392	no
XP_020921684.1 (+3)	175365	161369	193235	182812	0.0348268	1.11868	239109	188024	178195	1.34184	1.05516	-0.346753	no
XP_013852752.1 (+1)	46341	41764.8	43538.4	54728.3	0.239707	1.11834	128721	49133.3	46593.1	2.76265	1.05452	-1.38947	no
XP_020932506.1 (+1)	74761.1	59064.4	71715.6	75804.7	0.227503	1.11771	140753	73760.2	70336.4	2.00114	1.04868	-0.932251	no
NP_999353.1	71220.3	47975.2	70239.7	57848.8	0.466986	1.11709	139067	64044.3	61821	2.24952	1.03596	-1.11864	no
NP_999423.2	160254	149522	161369	184083	0.0932729	1.11651	240938	172726	163807	1.47087	1.05445	-0.480178	no
XP_020946072.1	82952.6	82379.6	85877.9	98647.9	0.0803537	1.1161	169428	92262.9	87464.5	1.9371	1.05486	-0.876849	no
XP_003125105.1	66450.8	71220.3	81245.5	72214.5	0.0779448	1.11602	128452	76730	72782.8	1.76486	1.05423	-0.743364	no
XP_020943008.1 (+11)	88906.4	72214.5	86475.3	91405.9	0.191909	1.116	113740	88940.6	84750.5	1.34206	1.04944	-0.354825	no
XP_003134407.1 (+2)	104998	92681.9	108701	110985	0.0655178	1.11565	233372	109843	104341	2.23663	1.05272	-1.0872	no
XP_001927404.1 (+1)	82379.6	74761.1	87076.8	87682.4	0.0350536	1.11474	112117	87379.6	82975	1.35122	1.05308	-0.35964	no
NP_999230.1	113317	112534	124864	126607	0.000185423	1.11346	143261	125736	119330	1.20054	1.05368	-0.188252	no
XP_005666204.1	145433	124002	136638	161369	0.223902	1.11308	210969	149003	141860	1.48716	1.05035	-0.50169	no
XP_005653267.2	104998	122295	124002	127488	0.107781	1.1129	123818	125745	119695	1.03444	1.05054	0.0222759	no
NP_001231455.1 (+6)	154795	200050	185364	202842	0.287558	1.1121	203778	194103	185763	1.09698	1.0449	-0.0701771	no
XP_003354337.1	84110.6	92681.9	93975.7	102127	0.072134	1.11184	120722	98051.2	93223.7	1.29497	1.05178	-0.30008	no
XP_020922163.1	145433	150562	154795	174154	0.0658862	1.11166	242723	164474	156236	1.55357	1.05273	-0.56145	no
NP_999069.1 (+3)	88906.4	80684.3	95950.3	92041.7	0.0463248	1.11112	121448	93996	89395.7	1.35855	1.05146	-0.369668	no
XP_013835243.2 (+2)	90147.5	74761.1	88906.4	92681.9	0.168458	1.11082	164392	90794.2	86624.2	1.89776	1.04814	-0.85647	no
NP_999186.1 (+6)	124002	127488	136638	142441	0.00633241	1.10992	175420	139539	132642	1.32251	1.052	-0.330143	no
XP_020934255.1 (+4)	182812	164759	172951	211456	0.22896	1.10897	256544	192203	182994	1.40192	1.05032	-0.41657	no
NP_001092053.1	162491	131984	218913	103552	0.685145	1.10693	184718	161233	154235	1.19764	1.04537	-0.196176	no
XP_001927356.3 (+2)	115698	135694	136638	139509	0.13152	1.10547	179885	138074	131885	1.36396	1.04693	-0.381637	no
XP_020927981.1 (+2)	118950	161369	142441	160254	0.385551	1.10513	177202	151347	145753	1.21576	1.03838	-0.227529	no
NP_001038055.1	239555	172951	225068	218913	0.384244	1.10511	347505	221991	214122	1.62293	1.03675	-0.646536	no
XP_020924764.1	107950	124002	112534	142441	0.3157	1.10455	154938	127487	121731	1.27278	1.04728	-0.281335	no
XP_001928025.1	46341	49667	50710.6	55109	0.0575863	1.10352	104190	52909.8	50456.9	2.06493	1.04861	-0.977607	no
XP_003358689.3	275177	256749	256749	329519	0.296846	1.10348	334241	293134	279548	1.19565	1.0486	-0.18933	no
XP_020952736.1	68319	59475.2	62866.3	77397.5	0.28614	1.10286	114340	70131.9	67014.5	1.7062	1.04652	-0.705185	no
XP_003360570.1 (+1)	50012.5	59888.9	60724.9	59475.2	0.172821	1.10261	150733	60100	57525.3	2.62029	1.04476	-1.32656	no
XP_020923738.1	117313	131072	118950	153726	0.335968	1.10118	286704	136338	130265	2.20093	1.04662	-1.07237	no
XP_020957553.1	45703	37640.5	43538.4	47314.7	0.230618	1.1004	216272	45426.5	43549.1	4.96617	1.04311	-2.25124	no
NP_001172070.1	110985	97966.4	114105	114898	0.0855102	1.10024	139709	114502	109489	1.27602	1.04579	-0.287059	no
NP_001230149.1	71715.6	73222.5	84110.6	75281.1	0.0684465	1.09984	108074	79695.8	76082.5	1.42049	1.04749	-0.439443	no
XP_005659808.1 (+1)	154795	194579	177813	201441	0.313296	1.09978	186889	189627	182157	1.02598	1.04101	0.0209855	no
XP_001928649.1 (+7)	70239.7	65083.3	76332	72214.5	0.0450556	1.09931	218729	74273.2	70967.4	3.08211	1.04658	-1.55823	no
NP_999064.1 (+3)	181549	148489	165905	193235	0.302999	1.09921	230532	179570	172295	1.33801	1.04223	-0.36042	no
NP_999528.1	110985	102837	119778	114898	0.0368123	1.09913	145382	117338	112124	1.29661	1.0465	-0.309174	no
XP_013849823.1	164759	147464	154795	186653	0.25348	1.09697	213068	170724	163418	1.30382	1.04471	-0.319648	no
XP_003121330.1	46987.8	44453.2	43538.4	56658.3	0.337246	1.09659	88464.2	50098.3	47909.4	1.84649	1.04569	-0.82033	no
XP_003124563.3	141457	128375	150562	144429	0.0640262	1.09582	155044	147496	141206	1.098	1.04454	-0.0720079	no
NP_001239142.1	119778	116502	124864	133826	0.0274833	1.09506	178434	129345	123743	1.44198	1.04528	-0.464165	no
XP_003127050.1	263967	215899	242900	277091	0.300771	1.0946	293912	259995	249964	1.17582	1.04013	-0.176898	no
XP_020928608.1	86475.3	93975.7	92041.7	104998	0.152337	1.09382	136142	98519.8	94372.6	1.4426	1.04394	-0.46663	no
NP_001230184.1 (+1)	104998	115698	114898	125733	0.112622	1.0929	152642	120316	115332	1.3235	1.04321	-0.343325	no
NP_999122.1	162491	118129	128375	170569	0.540388	1.09261	176656	149472	144891	1.21923	1.03162	-0.241064	no
XP_020923658.1 (+5)	99334	92041.7	109457	99334	0.0976948	1.09259	210319	104395	100042	2.10231	1.04352	-1.01052	no
XP_003123503.2	165905	201441	195933	201441	0.232397	1.09196	201269	198687	191180	1.05277	1.03927	-0.0186297	no
NP_001274346.1 (+2)	284881	338783	353169	322737	0.231771	1.09192	332196	337953	324892	1.02248	1.0402	0.0247899	no
XP_013848944.2	273276	341139	290867	370728	0.447402	1.09009	290715	330797	319002	0.911325	1.03697	0.186343	no
XP_020922113.1 (+1)	68319	57449.2	64633.7	71220.3	0.251431	1.08832	119738	67927	65405.6	1.83069	1.03855	-0.817818	no
XP_020942789.1	69272.7	72716.7	80127	74244.7	0.0534708	1.08784	91345.8	77185.8	74090.3	1.2329	1.04178	-0.243003	no
XP_005664107.1 (+7)	69272.7	64187.3	73222.5	71715.6	0.0386047	1.08758	96447.9	72469.1	69599.5	1.38575	1.04123	-0.412384	no
NP_999042.1 (+6)	343512	296979	378517	311744	0.351477	1.08343	381678	345130	332688	1.14725	1.0374	-0.145213	no
XP_001929549.1	97289.7	97966.4	104998	106464	0.000433372	1.08301	126214	105731	101679	1.2413	1.03984	-0.255479	no
XP_003356657.1 (+1)	68794.2	68794.2	68794.2	80127	0.18169	1.08237	107226	74460.6	71627.4	1.49699	1.03955	-0.526102	no
XP_020922176.1	114105	96617.7	104998	121450	0.319851	1.08208	130489	113224	109293	1.19394	1.03597	-0.204749	no
NP_001230581.1	74244.7	82952.6	77397.5	92041.7	0.294988	1.08119	170195	84719.6	81659.1	2.08421	1.03748	-1.00642	no
XP_020950232.1 (+3)	32768	27175.1	33456.5	30786.3	0.293101	1.08114	102041	32121.4	31046.5	3.28671	1.03462	-1.66754	no
NP_001231167.1 (+8)	101421	117313	124864	110218	0.271006	1.08044	140660	117541	113454	1.2398	1.03602	-0.259049	no
XP_003355965.1	66450.8	59888.9	60724.9	75281.1	0.363021	1.07942	148830	68003	65586.4	2.26923	1.03685	-1.13	no
NP_001104727.2 (+10)	85877.9	99334	91405.9	107204	0.329256	1.07803	200776	99305	95955.5	2.09239	1.03491	-1.01565	no
NP_999357.2	100025	95287.5	98647.9	111757	0.157955	1.0779	141790	105202	101429	1.39792	1.0372	-0.430588	no
XP_001927837.1 (+1)	34397.1	28329.2	32316.9	34636.4	0.31248	1.07747	129685	33476.6	32419.9	4.00016	1.0326	-1.95378	no
NP_998947.1	198668	221969	221969	229797	0.121715	1.07731	277146	225883	218101	1.27072	1.03568	-0.29507	no
XP_020951277.1 (+7)	73222.5	70728.3	73731.8	81245.5	0.0956485	1.07692	162747	77488.7	74732	2.17775	1.03689	-1.07058	no
XP_003356918.4 (+1)	102837	94629.3	104273	107950	0.0715891	1.07659	127329	106111	102422	1.24317	1.03602	-0.262981	no
NP_001230486.1	30152.7	34877.3	33689.2	35857.8	0.223412	1.07514	86031	34773.5	33644.3	2.55708	1.03356	-1.30687	no
XP_020941135.1	89524.8	102837	104273	101421	0.187623	1.07445	133366	102847	99513.9	1.34017	1.03349	-0.374893	no
NP_001161110.1	52864.1	44146.1	53602	49667	0.313154	1.07318	86089.5	51634.5	50069.8	1.71939	1.03125	-0.737502	no
XP_020926019.1 (+2)	56658.3	54350.3	60305.4	58656.4	0.0186306	1.07211	78277.1	59480.9	57492.6	1.36152	1.03458	-0.396165	no
XP_003131925.1	75804.7	76332	81810.6	81245.5	0.00016525	1.07179	109261	81528	78798.2	1.3866	1.03464	-0.422414	no
XP_003125999.3	65536	57848.8	62432.1	69272.7	0.249259	1.07159	296931	65852.4	63772.4	4.65611	1.03262	-2.17282	no
XP_005660286.2	88906.4	76862.9	85284.7	91405.9	0.24653	1.07154	138919	88345.3	85615	1.6226	1.03189	-0.653017	no
XP_003482884.1 (+6)	36107.2	32768	33225.4	40342.1	0.368801	1.07064	83421.9	36783.8	35610.7	2.34261	1.03294	-1.18136	no
XP_013843758.1 (+1)	198668	191901	197296	220436	0.14648	1.06987	254935	208866	202075	1.26159	1.03361	-0.287553	no
NP_001138373.1 (+1)	150562	138545	148489	160254	0.138998	1.06977	159221	154372	149463	1.06529	1.03284	-0.0446255	no
XP_020951715.1	64187.3	78478	69754.6	81245.5	0.439543	1.06915	120454	75500	73416.3	1.6407	1.02838	-0.673936	no
XP_003123386.2 (+1)	179050	164759	168221	198668	0.315141	1.06898	219955	183445	177675	1.23797	1.03248	-0.261863	no
NP_001302607.1	221969	229797	246290	236257	0.0262517	1.06846	273745	241274	233578	1.17196	1.03295	-0.182163	no
XP_020945075.1	124864	83529.6	104998	108701	0.620857	1.06745	179973	106849	105523	1.70553	1.01257	-0.752206	no
XP_020944423.1	142441	190575	197296	150562	0.622192	1.06686	192801	173929	170218	1.13267	1.0218	-0.148613	no
XP_013847647.1	163621	156956	153726	187951	0.369986	1.06628	198258	170839	165564	1.19747	1.03186	-0.214742	no
NP_999271.1	162491	179050	179050	184083	0.124396	1.06573	237252	181567	176168	1.34673	1.03064	-0.385922	no
XP_020924841.1	45703	48983.2	50012.5	50710.6	0.0579653	1.06504	120984	50361.5	48852.3	2.47653	1.03089	-1.26442	no
XP_005655247.1 (+3)	131984	111757	124864	132902	0.319697	1.06488	165907	128883	125377	1.32327	1.02797	-0.364316	no
NP_001231937.1	88906.4	87682.4	92041.7	95950.3	0.0172349	1.06463	136882	93996	91145.2	1.5018	1.03128	-0.542257	no
NP_001239143.1	84110.6	66450.8	88292.3	69754.6	0.57385	1.06436	131754	79023.4	77152.1	1.70772	1.02426	-0.737498	no
XP_020936862.1 (+2)	74244.7	43237.6	70239.7	46020.8	0.780697	1.0637	128220	58130.3	58435.7	2.1942	0.994773	-1.14125	no
XP_020920363.1 (+1)	83529.6	66913.1	72716.7	85284.7	0.505106	1.06321	144254	79000.7	77111	1.87074	1.02451	-0.868678	no
NP_001090942.2 (+1)	341139	462791	437827	397336	0.563599	1.0632	400203	417581	409773	0.976646	1.01906	0.061324	no
XP_003131575.2	91405.9	100025	101421	101421	0.111185	1.06176	153407	101421	98568.3	1.55635	1.02894	-0.597002	no
NP_001231372.1 (+2)	88292.3	94629.3	88906.4	104998	0.347179	1.06131	161515	96952.1	94206.5	1.71448	1.02915	-0.736322	no
NP_001098423.1	110985	112534	115698	121450	0.0289645	1.06103	206935	118574	115166	1.79683	1.02959	-0.803393	no
XP_020954605.1 (+5)	18053.6	17318.2	17198.6	20311.4	0.329258	1.06091	44669.5	18755	18220.4	2.45162	1.02934	-1.25202	no
XP_005671499.1	109457	112534	109457	125733	0.261022	1.05966	136444	117595	114295	1.19379	1.02887	-0.214487	no
XP_003480646.1 (+1)	128375	81810.6	95287.5	116502	0.716395	1.05964	155550	105895	105494	1.47449	1.0038	-0.554742	no
NP_001230620.1	102837	103552	102837	115698	0.200931	1.05886	214594	109267	106231	2.02007	1.02858	-0.973745	no
XP_020921541.1 (+6)	121450	110218	118950	125733	0.184246	1.05867	195182	122342	119088	1.63897	1.02732	-0.673903	no
NP_001163993.1	83529.6	100721	99334	93975.7	0.398819	1.05838	142594	96654.8	94390	1.51069	1.02399	-0.560999	no
XP_001927358.1	75804.7	69272.7	67847.1	85284.7	0.497131	1.05766	147520	76565.9	74552.3	1.97875	1.02701	-0.946139	no
NP_999381.1 (+3)	144429	149522	136638	174154	0.495565	1.05761	192073	155396	151186	1.27044	1.02785	-0.305705	no
XP_003480586.1 (+5)	136638	150562	140479	162491	0.360939	1.0574	209861	151485	147543	1.42237	1.02672	-0.470254	no
NP_001230857.1 (+1)	67378.5	67847.1	73222.5	69754.6	0.0312908	1.05734	108855	71488.5	69550.7	1.56511	1.02786	-0.606621	no
XP_003126581.1	107950	95950.3	102127	112534	0.312067	1.05643	147189	107330	104640	1.40662	1.02571	-0.45561	no
NP_001001542.1	107204	95287.5	106464	106464	0.221341	1.05519	153545	106464	103855	1.47846	1.02512	-0.528302	no
XP_020931560.1	122295	107950	111757	130167	0.428029	1.05482	213700	120962	118042	1.81038	1.02473	-0.821041	no
XP_020952890.1	128375	121450	132902	130167	0.0582229	1.05382	157299	131534	128223	1.22676	1.02582	-0.258072	no
XP_013848413.1	114898	118129	124864	120611	0.028524	1.05362	184171	122738	119626	1.53956	1.02601	-0.585471	no
XP_013854793.2 (+2)	119778	124002	149522	107204	0.632892	1.05343	170841	128363	125126	1.36535	1.02587	-0.412424	no
XP_003129766.1 (+2)	139509	146445	139509	161369	0.339229	1.05281	166310	150439	146708	1.13361	1.02543	-0.144699	no
XP_020922175.1	215899	191901	221969	205674	0.30723	1.0523	253540	213822	208861	1.21392	1.02375	-0.245806	no
NP_001177161.2	59475.2	53231.8	56658.3	61572.6	0.302814	1.05224	95333	59115.4	57734.5	1.65123	1.02392	-0.689441	no
XP_003360829.1	64633.7	53974.9	58656.4	65083.3	0.472152	1.05175	120126	61869.8	60587.1	1.9827	1.02117	-0.957241	no
NP_001231183.1	42939	54350.3	23987.6	76862.9	0.886219	1.05106	113179	50425.2	49534.9	2.28483	1.01797	-1.16638	no
NP_001116694.1	217401	223513	217401	244589	0.280869	1.048	259166	230995	225726	1.14814	1.02334	-0.166014	no
XP_020920337.1	139509	147464	142441	158048	0.271424	1.0479	188492	150244	146865	1.28344	1.02301	-0.327198	no
NP_001231758.1	117313	118129	118129	128375	0.159199	1.047	159078	123252	120486	1.3203	1.02295	-0.368123	no
XP_003129932.1	160254	143431	136638	180295	0.63822	1.04684	178815	158467	155155	1.1525	1.02135	-0.17429	no
XP_003130070.1 (+2)	117313	95287.5	98647.9	121450	0.636616	1.0465	168023	110049	108174	1.55326	1.01733	-0.610518	no
NP_999119.1	131072	146445	141457	147464	0.302671	1.04429	169771	144460	141609	1.19887	1.02013	-0.232917	no
XP_005663542.1 (+2)	93326.6	82952.6	84695.6	98647.9	0.506219	1.04369	136564	91671.7	89905.7	1.51897	1.01964	-0.57503	no
XP_005668211.1 (+2)	77397.5	78478	80684.3	81810.6	0.00550909	1.04252	138970	81247.4	79592.6	1.74602	1.02079	-0.77438	no
XP_020922255.1	83529.6	92681.9	82952.6	100025	0.566986	1.04121	124719	91488.8	89797.3	1.3889	1.01884	-0.447019	no
XP_003481945.2 (+6)	204253	182812	207105	194579	0.362363	1.04096	246018	200842	197187	1.24764	1.01853	-0.292703	no
XP_020934483.1	68794.2	57848.8	59064.4	71715.6	0.640318	1.04044	94149.5	65390	64355.8	1.46295	1.01607	-0.525884	no
NP_999293.1 (+5)	164759	138545	163621	149522	0.541718	1.04021	236974	156572	154112	1.53767	1.01596	-0.597904	no
XP_001924750.5 (+8)	100025	102127	100721	109457	0.219421	1.03981	181836	105089	103082	1.76399	1.01946	-0.791027	no
XP_003361930.1	68319	53602	60724.9	64187.3	0.630637	1.03968	143080	62456.1	61708.3	2.31865	1.01212	-1.19591	no
NP_001230567.1 (+1)	81810.6	75281.1	75804.7	87076.8	0.483245	1.03865	131478	81440.7	79993.3	1.64361	1.01809	-0.690994	no
XP_003122382.2	65536	71715.6	67378.5	74761.1	0.427524	1.03772	125425	71069.8	69847.8	1.79569	1.01749	-0.819515	no
NP_001138314.1	82952.6	110985	104998	92041.7	0.71904	1.03768	124142	98519.8	97744.2	1.27007	1.00793	-0.333511	no
XP_020953233.1	137588	140479	129267	159147	0.591699	1.03732	173446	144207	141621	1.22472	1.01826	-0.266345	no
XP_005674660.3	87682.4	83529.6	93326.6	84110.6	0.360391	1.03697	131221	88718.6	87162.3	1.50548	1.01785	-0.564688	no
XP_003127835.1 (+1)	98647.9	97966.4	103552	100025	0.0439372	1.03543	127572	101789	100048	1.27511	1.0174	-0.325739	no
XP_005662358.1 (+1)	97966.4	83529.6	92681.9	93975.7	0.516483	1.03499	135869	93328.8	92038.4	1.47622	1.01402	-0.54182	no
XP_003123542.1 (+2)	40905.3	37122.3	37902.4	42642.4	0.501962	1.03469	137523	40272.4	39643.1	3.46903	1.01587	-1.77181	no
XP_005663778.1 (+1)	117313	101421	110218	114898	0.498797	1.03464	186107	112558	110963	1.6772	1.01438	-0.725461	no
NP_001131108.1 (+1)	82379.6	77397.5	77397.5	87682.4	0.471481	1.03419	149293	82540	81214.3	1.83826	1.01632	-0.854978	no
XP_020931100.1	92041.7	86475.3	86475.3	97966.4	0.471481	1.03419	174994	92220.9	90739.7	1.92853	1.01632	-0.924143	no
XP_020920826.1	127488	123145	123145	135694	0.360667	1.03305	179987	129420	127368	1.41312	1.01611	-0.475834	no
XP_020934876.1	75281.1	82379.6	79573.5	82952.6	0.346493	1.03295	107598	81263.1	80046.7	1.34419	1.0152	-0.404979	no
NP_001172098.1	78478	83529.6	85284.7	81810.6	0.242799	1.03241	145856	83547.7	82275.7	1.77278	1.01546	-0.803878	no
XP_001927367.2	59888.9	50710.6	51776.1	61572.6	0.685204	1.03196	99952.3	56674.4	55987	1.78528	1.01228	-0.818544	no
XP_003356156.1 (+1)	118950	144429	126607	142441	0.675636	1.03117	183584	134524	133107	1.37922	1.01065	-0.448579	no
NP_001302503.1	130167	163621	160254	138545	0.730694	1.03042	194800	149400	148147	1.31491	1.00846	-0.382819	no
XP_020936854.1	131984	149522	120611	168221	0.793483	1.03002	174923	144416	142584	1.2268	1.01285	-0.276486	no
NP_999508.1	89524.8	99334	95287.5	98647.9	0.429442	1.02966	118051	96967.7	95698.6	1.23357	1.01326	-0.283834	no
NP_001230356.1	109457	119778	117313	118129	0.356608	1.02916	165335	117721	116169	1.42323	1.01336	-0.490023	no
NP_001231656.1 (+1)	96617.7	82379.6	87076.8	95950.3	0.636541	1.02902	129614	91513.5	90506.1	1.4321	1.01113	-0.50216	no
NP_001129982.1 (+1)	85284.7	71715.6	77935.9	82379.6	0.63036	1.0288	128224	80157.8	79329	1.61635	1.01045	-0.677749	no
XP_020929150.1	59888.9	87076.8	73222.5	72716.7	0.81395	1.0282	106877	72969.6	73226.2	1.45954	0.996496	-0.550579	no
NP_001272902.1	52136.3	57848.8	62000.8	50710.6	0.708485	1.02756	114568	56355.7	55674.1	2.05784	1.01224	-1.02357	no
XP_003131222.1	76862.9	75804.7	84110.6	72716.7	0.573077	1.0273	103295	78413.7	77373.7	1.33501	1.01344	-0.397593	no
XP_003482715.2	158048	193235	185364	171756	0.700538	1.02692	204711	178560	177101	1.1559	1.00824	-0.19718	no
XP_013835092.1 (+2)	154795	137588	145433	153726	0.538154	1.02673	188252	149580	147886	1.27295	1.01145	-0.331748	no
XP_020946700.1 (+3)	124864	133826	139509	125733	0.524929	1.02656	194137	132621	130983	1.48215	1.0125	-0.549766	no
XP_020926779.1	212927	165905	174154	208545	0.793621	1.02601	258630	191349	190383	1.35847	1.00508	-0.434681	no
XP_013850523.2	100721	104998	105728	104998	0.141049	1.02478	136331	105363	104111	1.30947	1.01202	-0.371743	no
XP_005656456.1 (+1)	75281.1	64633.7	69272.7	73222.5	0.646009	1.02437	181009	71247.6	70602.5	2.56378	1.00914	-1.34515	no
XP_003360292.2	168221	134757	148489	158048	0.744709	1.02424	244026	153269	152379	1.60144	1.00584	-0.670973	no
XP_003480866.3	77935.9	80127	72214.5	89524.8	0.737446	1.02346	118841	80869.6	79950.5	1.48643	1.0115	-0.555365	no
XP_020950866.1	127488	129267	118950	143431	0.717372	1.02196	188635	131191	129784	1.45345	1.01084	-0.523931	no
NP_999098.1	168221	129267	138545	160254	0.820364	1.02193	202858	149400	149072	1.3608	1.0022	-0.44129	no
XP_005660460.1	74761.1	85877.9	90147.5	73222.5	0.785582	1.02189	105762	81685	81002.3	1.30566	1.00843	-0.372671	no
XP_003483520.1	76332	57052.4	65083.3	68319	0.819867	1.02148	124641	66701.2	66696.7	1.86877	1.00007	-0.901993	no
XP_003122486.1	127488	111757	118129	124864	0.665568	1.02008	261314	121496	120559	2.16751	1.00777	-1.10487	no
NP_999014.1	75281.1	65991.8	71715.6	71715.6	0.646103	1.01969	126344	71715.6	71176	1.7751	1.00758	-0.817002	no
XP_003128150.2 (+1)	105728	85877.9	95950.3	97289.7	0.770943	1.01947	134453	96620	96211.5	1.39747	1.00425	-0.476705	no
XP_003357238.3	118129	93975.7	100025	113317	0.819411	1.01905	218849	106671	106361	2.0576	1.00291	-1.03677	no
XP_020928873.1	102837	124864	115698	114105	0.763862	1.01876	191743	114901	114376	1.67643	1.00459	-0.738783	no
XP_003359494.1 (+1)	54728.3	52864.1	62866.3	46663.3	0.847782	1.01831	112980	54764.8	54280.5	2.0814	1.00892	-1.04474	no
NP_001231081.1	96617.7	93326.6	97966.4	95287.5	0.267074	1.01773	139557	96627	95799.6	1.45676	1.00864	-0.530353	no
XP_020938403.1	67378.5	66913.1	69754.6	66913.1	0.248178	1.01771	128526	68333.8	67739.8	1.89734	1.00877	-0.911386	no
XP_005660237.2	129267	138545	120611	151609	0.816867	1.01768	212220	136110	135008	1.5719	1.00816	-0.640787	no
XP_013836649.2	86475.3	91405.9	84695.6	95950.3	0.710755	1.01632	192203	90323	89631.8	2.14437	1.00771	-1.08947	no
XP_020946136.1	58251.2	71220.3	63743.9	66450.8	0.809622	1.01578	121555	65097.4	64916.6	1.87248	1.00279	-0.900935	no
NP_001231108.1 (+2)	246290	211456	217401	244589	0.805789	1.01515	459217	230995	229934	1.99717	1.00461	-0.991315	no
XP_003126571.2 (+4)	145433	151609	154795	146445	0.52479	1.01457	171322	150620	149571	1.14542	1.00702	-0.185793	no
XP_020920567.1 (+2)	81810.6	81810.6	81245.5	84695.6	0.328352	1.01418	128152	82970.6	82390.6	1.55542	1.00704	-0.627179	no
XP_020919236.1	126607	122295	124864	127488	0.317174	1.01417	184056	126176	125313	1.46877	1.00688	-0.544711	no
XP_001924480.2	80127	69272.7	73731.8	76862.9	0.782485	1.01335	132263	75297.4	74998.6	1.76354	1.00398	-0.812741	no
XP_001928782.2	74761.1	62000.8	65536	71715.6	0.851043	1.01239	143555	68625.8	68503.4	2.09559	1.00179	-1.06478	no
XP_020951717.1 (+4)	104998	96617.7	97966.4	105728	0.738721	1.01206	166999	101847	101328	1.64811	1.00513	-0.713429	no
XP_003134195.4	217401	267652	209996	275177	0.918128	1.0111	279833	242586	242556	1.15368	1.00012	-0.206069	no
NP_001231282.1	108701	102127	104998	107950	0.61807	1.01104	561967	106474	105944	5.30439	1.005	-2.39999	no
XP_020947068.1	56658.3	57449.2	56658.3	58656.4	0.401062	1.01063	114507	57657.3	57355.6	1.99644	1.00526	-0.989861	no
XP_005662635.3 (+1)	220436	201441	201441	223513	0.830726	1.00934	262201	212477	211708	1.2385	1.00363	-0.303364	no
XP_003360330.1	115698	177813	161369	121450	0.956913	1.00875	145642	141409	144082	1.01083	0.981448	-0.0425517	no
NP_001231313.1	110218	116502	119778	108701	0.810143	1.00853	184979	114239	113800	1.62548	1.00386	-0.695305	no
XP_020947557.1	81245.5	85877.9	86475.3	81810.6	0.757052	1.00773	145879	84142.9	83852.3	1.73972	1.00347	-0.793861	no
NP_001231829.1 (+5)	130167	122295	129267	124864	0.738631	1.0076	176830	127066	126648	1.39623	1.0033	-0.476786	no
NP_001231715.1	168221	165905	172951	163621	0.687569	1.00737	202858	168286	167675	1.20983	1.00365	-0.269553	no
XP_020922137.1	265803	211456	215899	258535	0.938028	1.00714	295541	237217	237924	1.24217	0.997031	-0.317149	no
XP_020927514.1	125733	126607	127488	126607	0.0920702	1.00697	182785	127048	126609	1.4437	1.00347	-0.52478	no
NP_001106915.1 (+1)	294927	425854	353169	348307	0.955334	1.00642	317000	350738	355564	0.891541	0.986426	0.145909	no
XP_003130614.1 (+3)	68319	51776.1	58656.4	59888.9	0.943413	1.00619	279775	59272.6	59660.1	4.68949	0.993505	-2.23883	no
XP_003122400.2	92681.9	92681.9	100025	86475.3	0.893712	1.00613	143745	93250.1	92966	1.54621	1.00306	-0.624337	no
XP_005660860.1	113317	114898	122295	107204	0.891911	1.00567	171165	114749	114428	1.49583	1.0028	-0.576906	no
XP_001925712.1 (+1)	92681.9	104273	87076.8	110218	0.949844	1.00521	128046	98647.4	98562.3	1.29914	1.00086	-0.37631	no
NP_001038015.1 (+7)	148489	137588	137588	149522	0.886753	1.00507	188553	143555	143297	1.31582	1.0018	-0.393362	no
XP_020935784.1 (+1)	128375	124002	120611	132902	0.882454	1.0048	189947	126756	126472	1.50189	1.00225	-0.583541	no
NP_001038040.1	123145	124864	119778	129267	0.862762	1.00423	174208	124523	124264	1.40193	1.00208	-0.484407	no
NP_001106919.1 (+1)	869605	906533	822696	958222	0.949783	1.00312	925872	890459	889264	1.04117	1.00134	-0.056263	no
XP_020930389.1	128375	115698	114898	129267	0.950119	1.00309	190375	122083	122060	1.55969	1.00019	-0.640985	no
XP_001926855.2	80684.3	83529.6	76332	88292.3	0.952449	1.0028	204686	82312.1	82209.5	2.48981	1.00125	-1.31423	no
XP_020940501.1 (+4)	225068	59888.9	88292.3	101421	0.994207	1.00267	305752	94856.8	118668	2.57654	0.799349	-1.68854	no
XP_013837478.2	133826	149522	141457	141457	0.964726	1.00154	203099	141457	141565	1.43466	0.999232	-0.521822	no
NP_001231396.1	140479	129267	123145	146445	0.984784	1.00115	176587	134795	134834	1.30966	0.999709	-0.389609	no
NP_001231109.1	92041.7	93326.6	88906.4	96617.7	0.973171	1.00089	112213	92762.1	92723.1	1.21019	1.00042	-0.27463	no
XP_020925043.1 (+1)	88906.4	69272.7	77935.9	77935.9	0.991471	1.00083	145173	77935.9	78512.7	1.84904	0.992653	-0.897417	no
XP_003483025.2 (+6)	75281.1	59475.2	74761.1	58251.2	0.993861	1.00083	131548	66506.1	66942.1	1.9651	0.993487	-0.98403	no
XP_020935753.1	121450	114105	117313	118129	0.980025	1.00049	162926	117721	117749	1.38367	0.99976	-0.468849	no
NP_001231575.1	44453.2	44146.1	45073.8	43538.4	0.988751	1.00016	98803.5	44306.1	44302.9	2.23018	1.00007	-1.15706	no
XP_020920467.1	434802	422913	475801	381150	0.992013	0.999302	473770	428476	428667	1.10522	0.999555	-0.144974	no
XP_013846320.2 (+4)	110218	102127	112534	99334	0.986149	0.999206	142535	105934	106053	1.34399	0.998876	-0.42815	no
XP_020941973.1	131072	115698	119778	125733	0.976632	0.998774	190961	122755	123070	1.55164	0.997442	-0.637493	no
NP_999527.2 (+1)	78478	70728.3	75281.1	73222.5	0.952181	0.997983	125466	74251.8	74427.5	1.68575	0.99764	-0.756796	no
NP_001171997.1 (+2)	74761.1	80127	79023.8	75281.1	0.9227	0.997432	134236	77152.5	77298.2	1.7366	0.998114	-0.79899	no
XP_003126005.1	110218	123145	116502	114898	0.877938	0.994644	172650	115700	116191	1.48592	0.995778	-0.577457	no
XP_003483427.1	105728	102127	97966.4	108701	0.874215	0.994584	172179	103334	103630	1.66147	0.997135	-0.736601	no
XP_020931395.1	115698	112534	118129	108701	0.82812	0.994047	131968	113415	113765	1.16001	0.996919	-0.218587	no
NP_001172108.1 (+2)	122295	124002	110985	133826	0.918309	0.994017	214976	122405	122777	1.75095	0.996975	-0.812512	no
NP_001072132.1	239555	248003	251465	233005	0.817837	0.993963	287199	242235	243007	1.18185	0.996822	-0.245644	no
XP_003127333.3 (+1)	135694	161369	149522	143431	0.907915	0.993588	173860	146477	147504	1.17868	0.993035	-0.247257	no
NP_001152784.1	144429	138545	140479	140479	0.613789	0.993307	184771	140479	140983	1.31059	0.996426	-0.395379	no
XP_020939653.1	70728.3	72214.5	70728.3	71220.3	0.355539	0.993152	141457	70974.3	71222.8	1.98611	0.99651	-0.994991	no
XP_020933695.1 (+1)	46987.8	40342.1	44146.1	42055.3	0.885479	0.992827	112980	43100.7	43382.9	2.60425	0.993497	-1.39028	no
XP_020954737.1 (+1)	88292.3	112534	104998	91405.9	0.930551	0.992439	118030	98201.9	99307.5	1.18853	0.988867	-0.26533	no
XP_020952154.1	139509	112534	121450	125733	0.906589	0.992079	163331	123591	124806	1.30868	0.990264	-0.402223	no
XP_003354677.1 (+2)	100025	82952.6	85877.9	93975.7	0.895932	0.991559	183555	89926.8	90707.8	2.02358	0.99139	-1.02939	no
XP_020934877.1 (+1)	97289.7	108701	99334	104273	0.821306	0.99147	170512	101803	102399	1.66517	0.99418	-0.744091	no
XP_020925546.1 (+2)	85284.7	77935.9	82952.6	78478	0.786521	0.991042	110291	80715.3	81162.8	1.35889	0.994486	-0.450401	no
XP_020927995.1	88292.3	64633.7	68319	79573.5	0.931709	0.990799	154284	73946.3	75204.6	2.05152	0.983267	-1.06104	no
XP_003127785.2	136638	119778	118129	134757	0.869947	0.990515	231267	126443	127325	1.81635	0.993069	-0.871077	no
NP_999039.1	96617.7	93975.7	97289.7	91405.9	0.651081	0.990233	126770	94347.8	94822.3	1.33693	0.994997	-0.426157	no
NP_001231254.1 (+3)	138545	118950	114898	138545	0.893834	0.989997	222075	126722	127735	1.73856	0.99207	-0.809381	no
XP_005661448.1 (+2)	122295	124864	119778	124864	0.503373	0.989924	149470	122321	122950	1.21569	0.994883	-0.289181	no
XP_003132600.1 (+2)	162491	132902	135694	153726	0.888528	0.989711	285636	144710	146203	1.95369	0.989787	-0.981013	no
XP_001929114.2	32093.6	32541.7	29328.2	34636.4	0.842064	0.98967	48364.5	31982.3	32150	1.50434	0.994784	-0.596675	no
XP_020946054.1 (+12)	202842	185364	204253	179050	0.830578	0.989375	291135	191651	192877	1.50943	0.993645	-0.603202	no
XP_003124756.2	109457	95287.5	100025	101421	0.793148	0.988627	138582	100723	101548	1.3647	0.991881	-0.460348	no
XP_005654538.1 (+1)	94629.3	76332	84110.6	82952.6	0.863226	0.988522	130487	83531.6	84506.1	1.54411	0.988468	-0.643514	no
NP_001127815.1	103552	80684.3	85877.9	93326.6	0.881712	0.987907	126089	89602.2	90860.3	1.38773	0.986154	-0.492838	no
XP_003125148.1	128375	141457	129267	136638	0.726723	0.987773	226341	132953	133934	1.68994	0.992672	-0.767584	no
XP_003126608.2	120611	131984	124002	124864	0.654112	0.98724	148744	124433	125365	1.18649	0.992564	-0.257466	no
XP_003360781.2	75804.7	59475.2	67847.1	63743.9	0.867712	0.987115	112671	65795.5	66717.7	1.68877	0.986177	-0.77605	no
XP_020942125.1	51418.5	47643.8	49323.9	48308.9	0.604135	0.987003	134948	48816.4	49173.8	2.74431	0.992732	-1.46697	no
XP_003359054.1	155872	167059	161369	156956	0.581969	0.98692	195384	159162	160314	1.21876	0.992816	-0.295812	no
XP_020929599.1 (+1)	144429	146445	138545	148489	0.560159	0.986849	210421	143517	144477	1.45643	0.993357	-0.552051	no
XP_003354325.1 (+2)	47643.8	50012.5	48644.9	47643.8	0.437654	0.986576	106708	48144.3	48486.2	2.20079	0.992949	-1.14823	no
XP_003132957.5 (+1)	128375	131984	137588	118950	0.753509	0.985519	157703	128269	129224	1.22038	0.992611	-0.298031	no
NP_999548.1	248003	189259	215899	207105	0.860221	0.985174	449445	211502	215067	2.08979	0.983426	-1.08747	no
XP_003127168.2 (+5)	67378.5	60305.4	65083.3	60305.4	0.722012	0.985047	131566	62694.4	63268.2	2.07949	0.990931	-1.06938	no
XP_003134515.1	249728	167059	209996	184083	0.902986	0.984237	300089	197040	202717	1.48034	0.971995	-0.606904	no
NP_001231909.1 (+1)	69272.7	54350.3	54350.3	65536	0.866622	0.984112	107175	59943.1	60877.3	1.76051	0.984655	-0.838303	no
XP_020955735.1	251465	246290	233005	256749	0.610459	0.984031	330489	244877	246877	1.33868	0.991897	-0.432546	no
NP_999499.1	40063.5	32541.7	28329.2	42347.8	0.908215	0.984004	107911	35338.5	35820.5	3.01254	0.986543	-1.61052	no
XP_020923731.1	160254	176585	165905	164759	0.602592	0.983984	210965	165332	166876	1.2642	0.990751	-0.351632	no
XP_005655861.2	65536	58251.2	51063.3	70239.7	0.873146	0.983338	111877	60651.5	61272.6	1.82589	0.989864	-0.883297	no
XP_003134838.1 (+4)	84695.6	71715.6	78478	74244.7	0.757369	0.983188	90818.5	76361.3	77283.5	1.17514	0.988068	-0.250145	no
XP_003358693.1	67847.1	45073.8	48644.9	57848.8	0.900764	0.983067	113550	53246.8	54853.6	2.07006	0.970708	-1.09256	no
NP_001274344.1	209996	195933	171756	226633	0.843026	0.982606	250059	199195	201079	1.24358	0.990626	-0.328091	no
XP_020918532.1	71220.3	56266.9	54728.3	68794.2	0.86216	0.982417	140014	61761.3	62752.4	2.23122	0.984205	-1.1808	no
XP_001928678.3 (+3)	89524.8	73731.8	72214.5	86475.3	0.818247	0.981208	130430	79344.9	80486.6	1.62052	0.985815	-0.717068	no
NP_999195.1 (+5)	215899	167059	179050	190575	0.816277	0.98114	230666	184812	188146	1.22599	0.982282	-0.319741	no
XP_003124603.3	79573.5	79023.8	74244.7	81245.5	0.499437	0.98042	155378	77745.1	78521.9	1.97879	0.990107	-0.998961	no
XP_020950851.1 (+2)	156956	131984	135694	145433	0.733343	0.980286	280101	140564	142517	1.96539	0.986297	-0.994722	no
XP_003123266.2	127488	118129	107204	132902	0.765113	0.978985	168111	120053	121431	1.38442	0.988654	-0.48574	no
NP_001108627.1 (+2)	70239.7	58656.4	58251.2	66913.1	0.764601	0.978953	110303	62582.1	63515.1	1.73665	0.985311	-0.817652	no
XP_020949661.1 (+1)	279018	402883	375903	269514	0.888924	0.978792	304550	322708	331829	0.917791	0.972513	0.083552	no
XP_020942183.1	177813	128375	134757	156956	0.84324	0.97823	221654	145856	149475	1.48288	0.975791	-0.603761	no
NP_999583.1	87076.8	100721	105728	76862.9	0.833366	0.977436	247331	91295.5	92597.1	2.67104	0.985944	-1.43782	no
NP_001230350.1 (+1)	78478	75804.7	72214.5	78478	0.43243	0.977023	123240	75346.2	76243.8	1.6164	0.988228	-0.709868	no
NP_001230638.1	131072	158048	139509	140479	0.69086	0.976922	156781	139994	142277	1.10194	0.983956	-0.163385	no
NP_001098766.1 (+1)	128375	135694	114105	143431	0.7406	0.976011	178735	128768	130401	1.37065	0.987476	-0.473047	no
XP_001929699.1	114105	101421	100721	108701	0.572378	0.975052	162750	104711	106237	1.53195	0.985634	-0.636247	no
XP_003126971.1 (+1)	85877.9	92681.9	89524.8	84110.6	0.41443	0.973835	135202	86817.7	88048.8	1.53553	0.986018	-0.639054	no
NP_001230558.1	14766.1	12245.8	12765.8	13307.9	0.658733	0.973747	128083	13036.9	13271.4	9.65102	0.982328	-3.2964	no
XP_003484156.1 (+3)	92681.9	91405.9	87076.8	92041.7	0.191787	0.973052	150933	89559.2	90801.6	1.66223	0.986318	-0.752995	no
XP_020944557.1 (+4)	81810.6	80127	88906.4	68319	0.720114	0.971007	127198	78612.7	79790.8	1.59414	0.985236	-0.69424	no
XP_003358947.2	124002	137588	128375	124864	0.402452	0.970693	175778	126619	128707	1.36572	0.983778	-0.473255	no
NP_001230371.1	88906.4	81810.6	80127	85284.7	0.387142	0.9706	113398	82705.8	84032.2	1.34946	0.984216	-0.455334	no
XP_020948160.1	32316.9	29532.2	29532.2	30362.4	0.343322	0.970367	95620.5	29947.3	30435.9	3.1417	0.983946	-1.67489	no
NP_001231362.1 (+1)	129267	151609	142441	128375	0.616246	0.970316	154977	135408	137923	1.12365	0.981762	-0.194744	no
NP_001116682.1	231395	246290	233005	229797	0.189724	0.969785	259334	231401	235122	1.10298	0.984174	-0.16442	no
XP_003133941.2	80684.3	81245.5	80684.3	76332	0.147784	0.969668	110012	78508.1	79736.5	1.3797	0.984595	-0.486753	no
XP_001927120.1 (+2)	73731.8	80127	64187.3	84695.6	0.728897	0.969334	84922.4	74441.5	75685.4	1.12204	0.983564	-0.190039	no
XP_003123376.1 (+1)	64187.3	51063.3	54350.3	55878.3	0.662053	0.96899	118916	55114.3	56369.8	2.10956	0.977727	-1.10944	no
XP_020926480.1 (+3)	101421	87682.4	92041.7	90147.5	0.499264	0.968548	127853	91094.6	92823.2	1.37738	0.981377	-0.489051	no
XP_020922815.1 (+2)	373306	320508	394591	273276	0.792059	0.96821	489004	333934	340420	1.43647	0.980945	-0.550284	no
XP_020922637.1	110985	89524.8	95287.5	96617.7	0.632353	0.968179	151327	95952.6	98103.7	1.54252	0.978074	-0.657273	no
NP_001098778.1	58251.2	51418.5	51776.1	53974.9	0.447908	0.968026	103014	52875.5	53855.2	1.91279	0.981809	-0.962163	no
XP_020947606.1	74244.7	100721	70728.3	94629.3	0.798474	0.967236	112147	82678.8	85080.7	1.31812	0.971769	-0.439802	no
NP_001163991.1 (+1)	96617.7	97289.7	90774.5	96617.7	0.150824	0.966412	142959	93696.1	95324.9	1.4997	0.982913	-0.609537	no
XP_001924348.1	95287.5	98647.9	94629.3	92681.9	0.0574611	0.966134	165042	93655.6	95311.7	1.7316	0.982625	-0.817397	no
NP_001011507.1	195933	226633	195933	209996	0.500781	0.965725	281811	202964	207124	1.36059	0.979918	-0.473501	no
NP_001138849.1 (+1)	114105	116502	119778	102837	0.478677	0.965446	168455	111307	113305	1.48673	0.982365	-0.597815	no
XP_005673581.2 (+2)	81245.5	90774.5	94629.3	70728.3	0.706326	0.964229	126948	82678.8	84344.4	1.50512	0.980252	-0.618653	no
XP_003132418.1	104273	103552	94629.3	105728	0.329046	0.964081	188383	100179	102046	1.84607	0.981706	-0.911094	no
NP_001231359.1	68319	48983.2	56658.3	53231.8	0.718086	0.962977	99970.8	54945	56798.1	1.76011	0.967375	-0.863518	no
XP_020953078.1	131984	126607	125733	123145	0.0638235	0.962855	170682	124439	126867	1.34536	0.98086	-0.455877	no
NP_001302601.1 (+2)	66913.1	51418.5	55878.3	55878.3	0.627878	0.960911	142194	55878.3	57522	2.47199	0.971424	-1.3475	no
NP_001139599.1 (+3)	63743.9	55878.3	63303.6	51063.3	0.608352	0.960219	194816	57183.5	58497.3	3.33034	0.977541	-1.76844	no
XP_020954760.1	61147.3	58656.4	55492.3	59475.2	0.172478	0.960048	121036	57483.7	58692.8	2.0622	0.979401	-1.07421	no
XP_003353540.1	25531.7	22381.2	27364.2	18433	0.749429	0.959992	42259.9	22898.6	23427.5	1.80386	0.977422	-0.884033	no
XP_020932589.1 (+1)	117313	109457	107950	109457	0.132774	0.959863	172041	108703	111044	1.54931	0.97892	-0.662359	no
XP_005667638.2 (+8)	55492.3	52864.1	46341	57449.2	0.542806	0.958423	187476	51895.1	53036.6	3.53484	0.978476	-1.85304	no
NP_001193360.1	341139	231395	284881	242900	0.733236	0.956994	404883	263890	275079	1.47188	0.959326	-0.617567	no
NP_001231430.1	84110.6	80684.3	81810.6	75804.7	0.169809	0.956847	153865	78807.7	80602.5	1.90894	0.977732	-0.965259	no
XP_003126410.2	95287.5	89524.8	95287.5	81245.5	0.421076	0.956131	144611	88266.5	90336.3	1.60081	0.977087	-0.712244	no
NP_001001864.1 (+1)	80684.3	75804.7	64187.3	85284.7	0.620583	0.95609	150924	74736	76490.3	1.97311	0.977066	-1.01395	no
NP_001193304.1 (+2)	105728	92681.9	90147.5	98647.9	0.387951	0.955673	109768	94397.7	96801.4	1.13395	0.975169	-0.217631	no
NP_999319.2	151609	139509	144429	132902	0.253094	0.954287	179164	138665	142112	1.26072	0.975745	-0.369673	no
XP_020931095.1	126607	171756	142441	135694	0.624144	0.954048	245558	139067	144124	1.70379	0.964912	-0.820277	no
XP_003126945.3 (+2)	97966.4	108701	98647.9	97966.4	0.206436	0.953931	142729	98307.1	100820	1.41568	0.975073	-0.537909	no
XP_003360255.2	93326.6	91405.9	79573.5	96617.7	0.452583	0.953867	184732	88095.6	90230.9	2.04733	0.976335	-1.0683	no
XP_003123401.1 (+1)	153726	168221	155872	150562	0.18008	0.953748	193789	153217	157095	1.23358	0.975313	-0.338913	no
XP_020930092.1	59888.9	63303.6	56658.3	60724.9	0.153619	0.953577	97529.4	58691.6	60143.9	1.6216	0.975853	-0.732683	no
NP_001231417.1 (+1)	91405.9	77397.5	73222.5	86475.3	0.516745	0.952618	162134	79848.9	82125.3	1.97423	0.972281	-1.02184	no
XP_020955334.1 (+1)	175365	150562	153726	154795	0.33575	0.952109	194984	154260	158612	1.22932	0.972565	-0.33799	no
XP_003127552.3	181549	262144	175365	233005	0.729912	0.951792	240205	204185	213016	1.12764	0.958544	-0.234393	no
NP_999189.1	104998	119778	107950	104998	0.280321	0.951493	146474	106474	109431	1.33851	0.972978	-0.460148	no
NP_999147.1 (+3)	25888.1	33456.5	33923.6	21618.8	0.753549	0.951404	71908.9	27771.2	28721.7	2.50364	0.966905	-1.37258	no
XP_020921208.1 (+1)	118950	109457	103552	113317	0.242494	0.951128	161006	108434	111319	1.44635	0.974088	-0.570288	no
XP_020949232.1	267652	263967	241222	263967	0.141061	0.950329	287823	252595	259202	1.11042	0.974508	-0.18836	no
XP_020925064.1 (+1)	134757	127488	128375	120611	0.117704	0.950169	199391	124493	127808	1.56009	0.974064	-0.679537	no
XP_020927464.1	150562	139509	137588	137588	0.0966752	0.950032	163328	137588	141312	1.1558	0.97365	-0.247413	no
XP_003133651.1 (+1)	100025	98647.9	94629.3	93975.7	0.00127005	0.949371	155134	94302.5	96819.5	1.6023	0.974004	-0.718146	no
XP_020922127.1	137588	140479	146445	117313	0.46006	0.94864	190453	131879	135456	1.40601	0.973589	-0.530218	no
XP_020945717.1 (+2)	42939	8079.22	15716.6	10085.5	0.906241	0.948636	58874.9	12901.1	19205.1	3.06559	0.671753	-2.19016	no
XP_003124275.1	51063.3	55109	55492.3	45073.8	0.457716	0.948574	64007.4	50283	51684.6	1.23842	0.972882	-0.348166	no
NP_001191701.1 (+5)	191901	237901	218913	184083	0.544122	0.9485	227265	201498	208200	1.09157	0.967814	-0.173606	no
NP_001138854.1	89524.8	89524.8	80127	89524.8	0.18169	0.947513	166922	84825.9	87175.3	1.91479	0.973049	-0.976601	no
XP_001927148.3	179050	182812	165905	176585	0.0588627	0.946569	219672	171245	176088	1.24752	0.972497	-0.359292	no
XP_003131920.4 (+3)	106464	80127	79573.5	93326.6	0.581958	0.945464	215920	86450	89872.6	2.40251	0.961917	-1.32056	no
XP_003134215.1	85877.9	75281.1	78478	73222.5	0.271158	0.945397	157594	75850.2	78214.9	2.01488	0.969767	-1.05498	no
NP_001230406.1	158048	141457	142441	139509	0.167475	0.944285	185987	140975	145363	1.27946	0.969809	-0.399763	no
XP_013845902.2 (+4)	50710.6	39239	41189.8	42347.8	0.482307	0.944071	204436	41768.8	43371.8	4.71358	0.963041	-2.29115	no
XP_003123362.2 (+1)	114898	117313	104273	114898	0.129717	0.943946	166317	109586	112846	1.47385	0.971111	-0.601878	no
XP_020940121.1	90147.5	82952.6	82379.6	80684.3	0.0946901	0.943651	144122	81532	84041	1.71491	0.970145	-0.821857	no
NP_999191.1 (+2)	93326.6	92041.7	85284.7	89524.8	0.0255288	0.943085	116020	87404.8	90044.5	1.28848	0.970685	-0.408592	no
XP_020951579.1	152664	84110.6	96617.7	107950	0.74645	0.943027	194140	102284	110335	1.75954	0.927025	-0.924523	no
NP_001116652.1 (+2)	53602	40342.1	43841.2	42939	0.509636	0.942519	105021	43390.1	45181.1	2.32444	0.96036	-1.27523	no
XP_020925195.1 (+2)	134757	129267	102127	146445	0.59356	0.94188	163283	124286	128149	1.27417	0.969854	-0.393714	no
XP_001927133.1	32541.7	25531.7	24154.4	29737.6	0.549833	0.941721	100389	26946	27991.3	3.58642	0.962655	-1.89745	no
NP_999074.1	109457	110218	99334	107204	0.0636002	0.940211	223561	103269	106553	2.09812	0.969178	-1.11426	no
XP_003129051.1	111757	105728	100721	103552	0.0375882	0.939974	134293	102136	105439	1.27366	0.968675	-0.394891	no
XP_003125059.2	48308.9	31872	33225.4	38967.9	0.649899	0.93988	78046.4	36096.7	38093.5	2.04881	0.94758	-1.11247	no
XP_003128804.1	30786.3	25888.1	26801	26068.1	0.295004	0.939879	46833.1	26434.6	27385.9	1.71012	0.965263	-0.825102	no
XP_003122328.1	61147.3	70728.3	59475.2	63743.9	0.258841	0.939317	99846	61609.5	63773.7	1.56563	0.966066	-0.696551	no
XP_003130457.2	128375	154795	135694	127488	0.325899	0.937577	151068	131591	136588	1.10601	0.963416	-0.199139	no
XP_020922489.1	94629.3	81245.5	92681.9	71220.3	0.501132	0.937353	120161	81951.1	84944.2	1.41459	0.964763	-0.552134	no
XP_003129075.5	273276	218913	215899	239555	0.409417	0.936793	318663	227727	236911	1.34508	0.961236	-0.484725	no
NP_001116589.1 (+1)	142441	143431	136638	131072	0.0113999	0.93648	208891	133855	138395	1.50938	0.967192	-0.642081	no
NP_001192332.1	69754.6	55878.3	57052.4	59064.4	0.364995	0.935669	816367	58058.4	60437.4	13.5076	0.960637	-3.81364	no
XP_001927475.1	301124	307452	313912	254976	0.33048	0.934886	351137	284444	294366	1.19286	0.966293	-0.30389	no
XP_005662075.1	92681.9	102837	90774.5	91405.9	0.10124	0.9343	148560	91090.2	94424.8	1.57332	0.964685	-0.705679	no
XP_020927954.1 (+1)	118129	107950	107204	103552	0.0852947	0.93412	132195	105378	109209	1.21048	0.964925	-0.327096	no
XP_003127836.1	54728.3	45387.3	45387.3	47314.7	0.291029	0.934081	112577	46351	48204.4	2.33541	0.961551	-1.28024	no
XP_020958037.1	82379.6	82952.6	74761.1	79573.5	0.0292664	0.933493	149293	77167.3	79916.7	1.8681	0.965596	-0.952082	no
NP_999569.1	124864	102837	90774.5	119778	0.517344	0.933422	173847	105276	109563	1.58673	0.96087	-0.723643	no
XP_003360563.5 (+1)	55109	57052.4	55492.3	48983.2	0.14464	0.931755	89745.4	52237.8	54159.2	1.65706	0.964522	-0.780744	no
XP_001926664.3 (+3)	149522	135694	127488	137588	0.131225	0.931576	208997	132538	137573	1.51917	0.963401	-0.657077	no
XP_020950952.1 (+3)	348307	228210	262144	251465	0.584843	0.931298	401909	256805	272531	1.47473	0.942294	-0.646198	no
XP_005672588.2	46987.8	45073.8	44453.2	41189.8	0.0590006	0.930682	97348.2	42821.5	44426.2	2.19124	0.963881	-1.18482	no
XP_005653330.2	74244.7	59475.2	59475.2	63303.6	0.335696	0.929519	190747	61389.4	64124.7	2.97463	0.957345	-1.6356	no
XP_020957089.1	40342.1	32093.6	28526.2	37902.4	0.520464	0.929116	128634	33214.3	34716.1	3.70533	0.95674	-1.9534	no
XP_003133048.1 (+2)	115698	77397.5	103552	68794.2	0.675102	0.9291	191502	86173.3	91360.4	2.09612	0.943223	-1.15205	no
XP_003129166.3 (+1)	57848.8	45387.3	44453.2	50012.5	0.394867	0.928575	92968.7	47232.8	49425.4	1.88099	0.955638	-0.976955	no
XP_020943389.1	65083.3	51063.3	51063.3	55109	0.364344	0.927639	102206	53086.2	55579.7	1.8389	0.955135	-0.945067	no
NP_001230811.1	108701	90774.5	91405.9	92041.7	0.227363	0.927139	120126	91723.8	95730.7	1.25484	0.958144	-0.389184	no
NP_001265690.1 (+1)	135694	132902	128375	120611	0.0255214	0.927089	154515	124493	129395	1.19413	0.962111	-0.311681	no
XP_020933072.1 (+1)	1.40292e+06	1.49322e+06	1.19618e+06	1.48291e+06	0.302505	0.925954	1.42577e+06	1.33954e+06	1.39381e+06	1.02293	0.961068	-0.0899996	no
XP_020938923.1	93975.7	100025	98647.9	80684.3	0.274876	0.925289	144336	89666.1	93333.2	1.54646	0.960709	-0.686797	no
XP_020922451.1	126607	111757	110218	109457	0.110488	0.925185	163730	109837	114510	1.42983	0.959197	-0.575946	no
XP_003127578.2 (+3)	37380.5	28133.5	32768	26615.9	0.481708	0.924856	97686	29691.9	31224.5	3.12851	0.950919	-1.71808	no
XP_005657071.1 (+1)	109457	115698	99334	108701	0.0758297	0.924675	160875	104017	108297	1.4855	0.96048	-0.629118	no
XP_005672754.1	142441	133826	132902	122295	0.0727766	0.924631	178548	127598	132866	1.34382	0.960354	-0.484703	no
XP_020942455.1	131072	97966.4	106464	100721	0.40393	0.923885	154894	103592	109056	1.42032	0.949901	-0.580366	no
XP_003122287.1 (+1)	79023.8	69272.7	71220.3	65083.3	0.168181	0.92312	128691	68151.8	71150	1.80872	0.95786	-0.917086	no
NP_001005208.1	137588	118950	119778	115698	0.147607	0.922764	185232	117738	123004	1.50591	0.957189	-0.653759	no
NP_001004042.1	118950	107204	98647.9	109457	0.142781	0.922677	166594	104052	108565	1.53451	0.958435	-0.679029	no
XP_020936851.1	118129	100721	104998	95287.5	0.209309	0.921002	166774	100143	104784	1.5916	0.955709	-0.735834	no
XP_020952242.1	225068	233005	217401	204253	0.0249876	0.920774	260188	210827	219932	1.18304	0.958603	-0.303491	no
XP_020944711.1	172951	176585	163621	158048	0.00507417	0.920376	225087	160834	167801	1.34139	0.958483	-0.484905	no
XP_013839162.2 (+4)	130167	151609	131984	125733	0.15566	0.919941	261239	128858	134873	1.93692	0.955403	-1.01958	no
XP_020921925.1 (+1)	87682.4	70239.7	70728.3	72716.7	0.266663	0.919545	153674	71722.5	75341.8	2.03969	0.951962	-1.09938	no
XP_003481269.2	84110.6	74244.7	70239.7	74761.1	0.116973	0.919236	140378	72500.4	75839	1.85099	0.955978	-0.953251	no
XP_020920661.1	37380.5	22851.5	26249.5	25888.1	0.572357	0.91909	122076	26068.8	28092.4	4.34553	0.927965	-2.22739	no
XP_020953003.1 (+2)	41764.8	37640.5	40905.3	31872	0.339512	0.919008	66945	36388.6	38045.7	1.7596	0.956446	-0.879488	no
NP_001302637.1 (+1)	52136.3	45703	41189.8	48308.9	0.234749	0.918724	92199.8	44749.3	46834.5	1.96863	0.955478	-1.0429	no
XP_001929229.1	106464	100721	90774.5	99334	0.0617862	0.918288	293117	95054.3	99323.2	2.95114	0.95702	-1.62465	no
NP_001230548.1 (+5)	73222.5	74244.7	71220.3	64187.3	0.0604074	0.918266	167198	67703.8	70718.7	2.36427	0.957367	-1.30425	no
XP_005671155.1 (+4)	111757	120611	102837	110218	0.0579265	0.918222	158098	106527	111356	1.41975	0.956642	-0.569589	no
XP_013836876.2	93326.6	102837	88292.3	91405.9	0.0578632	0.918222	131758	89849.1	93965.4	1.4022	0.956193	-0.552315	no
NP_001231271.1 (+1)	80684.3	72214.5	66913.1	72716.7	0.105824	0.916028	116294	69814.9	73132.1	1.5902	0.954641	-0.736175	no
XP_020925422.1 (+3)	52136.3	47643.8	45703	45387.3	0.0374485	0.914765	101460	45545.1	47717.6	2.12627	0.954473	-1.15555	no
NP_001231079.1 (+2)	60305.4	99334	62000.8	75281.1	0.583502	0.914617	87106.4	68641	74230.3	1.17346	0.924702	-0.343709	no
XP_013849576.1	116502	95287.5	90774.5	100721	0.241681	0.913339	192834	95747.6	100821	1.91264	0.949676	-1.01005	no
XP_013842762.1	124864	95287.5	95950.3	101421	0.315365	0.913004	157406	98685.8	104381	1.508	0.94544	-0.673575	no
NP_001188310.1 (+2)	110218	97289.7	95287.5	93326.6	0.0783526	0.912492	173962	94307	99030.5	1.75665	0.952304	-0.883334	no
XP_005668692.1 (+1)	77397.5	70239.7	67378.5	66913.1	0.0409599	0.911747	120635	67145.8	70482.2	1.71157	0.952663	-0.845282	no
XP_013834712.2 (+1)	151609	104273	107950	117313	0.440944	0.911533	211498	112631	120286	1.75829	0.936361	-0.909039	no
XP_003129421.2	256749	262144	275177	197296	0.379172	0.910638	356774	236236	247841	1.43953	0.953175	-0.59478	no
XP_020940811.1	112534	131984	111757	109457	0.123774	0.910453	187815	110607	116433	1.61308	0.949962	-0.763875	no
XP_003130303.1 (+1)	126607	112534	122295	94629.3	0.31154	0.910248	142107	108462	114016	1.24638	0.951285	-0.389793	no
XP_003356040.1 (+11)	189259	169391	154795	170569	0.102532	0.909985	243234	162682	171004	1.42239	0.951338	-0.580285	no
XP_020946118.1 (+1)	56658.3	50360.3	47643.8	49323.9	0.0668391	0.909231	83459.3	48483.8	50996.6	1.63657	0.950727	-0.783569	no
XP_013841770.2	85877.9	80127	71715.6	79023.8	0.0622955	0.909133	128817	75369.7	79186.1	1.62676	0.951805	-0.773265	no
XP_020942149.1 (+1)	355626	373306	313912	348307	0.0565956	0.909013	433023	331109	347788	1.24508	0.952045	-0.387136	no
XP_020949364.1 (+1)	154795	187951	155872	152664	0.171602	0.90869	190405	154268	162821	1.16942	0.947472	-0.303635	no
NP_001269043.1 (+1)	94629.3	92681.9	88906.4	80684.3	0.0356014	0.905493	119810	84795.4	89225.5	1.34277	0.950349	-0.498685	no
XP_003132357.4	74244.7	76862.9	67378.5	69272.7	0.00375373	0.904602	98232.3	68325.6	71939.7	1.36548	0.949762	-0.523771	no
XP_003354019.2 (+1)	68319	71220.3	63303.6	62866.3	0.00323074	0.90458	180076	63085	66427.3	2.71087	0.949684	-1.51323	no
XP_020949658.1 (+1)	85877.9	98647.9	103552	62432.1	0.526357	0.903847	102491	82992.2	87627.5	1.16962	0.947102	-0.304445	no
XP_003481678.1	71715.6	53602	52864.1	57848.8	0.30392	0.902309	132021	55356.4	59007.6	2.23736	0.938123	-1.25394	no
XP_003482013.2	141457	152664	129267	135694	0.0253081	0.902171	207448	132481	139771	1.48421	0.947845	-0.646969	no
XP_020922676.1 (+2)	75804.7	65083.3	60724.9	65536	0.112527	0.901399	118447	63130.4	66787.2	1.7735	0.945247	-0.907835	no
NP_999405.1 (+3)	100721	127488	102127	100721	0.204757	0.901268	141910	101424	107764	1.31686	0.941165	-0.484587	no
XP_020940806.1	112534	86475.3	86475.3	89524.8	0.240433	0.89981	143750	88000	93752.3	1.53329	0.938644	-0.707985	no
XP_001925937.3	116502	119778	112534	100025	0.049686	0.899778	173161	106279	112210	1.54319	0.94715	-0.704249	no
XP_003360114.3	221969	200050	187951	190575	0.0343146	0.899368	358607	189263	200136	1.79181	0.945671	-0.922011	no
NP_001001640.1	160254	150562	144429	134757	0.0251232	0.899109	217703	139593	147500	1.47595	0.94639	-0.641136	no
XP_020947454.1 (+2)	39786.7	31000.4	37122.3	25531.7	0.448639	0.898954	118811	31327	33360.3	3.56144	0.939051	-1.92318	no
XP_001926511.1	115698	107950	98647.9	102127	0.0151111	0.898807	157174	100387	106105	1.4813	0.946108	-0.646786	no
XP_020937639.1 (+1)	82952.6	53602	49667	67378.5	0.514252	0.898648	127099	58522.7	63400	2.00471	0.923071	-1.11888	no
XP_020918668.1 (+6)	60724.9	85877.9	55109	72716.7	0.441104	0.898364	105178	63912.9	68607.1	1.53305	0.931578	-0.718656	no
NP_001230326.1 (+1)	100721	154795	114898	104273	0.432008	0.897977	149366	109586	118672	1.25864	0.923434	-0.44679	no
XP_005656255.1	80127	71220.3	70239.7	65083.3	0.066282	0.897231	130487	67661.5	71667.6	1.82073	0.944102	-0.947502	no
XP_020940797.1	65536	50360.3	51776.1	50360.3	0.226764	0.896648	76726.6	51068.2	54508.2	1.40762	0.936891	-0.587301	no
XP_003483803.1	56266.9	47975.2	43538.4	49323.9	0.142529	0.896505	221026	46431.2	49276.1	4.48546	0.942265	-2.25105	no
NP_001230847.1	218913	223513	217401	179050	0.131215	0.89618	257079	198225	209719	1.22583	0.945194	-0.375072	no
NP_998954.1 (+3)	42939	33225.4	36358.4	30786.3	0.27971	0.896151	54364.7	33572.3	35827.3	1.51741	0.937061	-0.695398	no
NP_001231080.1	123145	120611	112534	105728	0.00865571	0.895509	184718	109131	115504	1.59923	0.94482	-0.759261	no
XP_020918895.1	114105	131984	110985	107950	0.0698425	0.894378	148264	109467	116256	1.27533	0.941607	-0.437673	no
XP_005653969.1	104998	85284.7	81810.6	86475.3	0.151472	0.893995	150385	84142.9	89642.1	1.67762	0.938654	-0.837748	no
XP_020951079.1 (+6)	92681.9	82379.6	77397.5	78478	0.0399395	0.893498	161955	77937.7	82734.3	1.95753	0.942025	-1.0552	no
XP_020931600.1 (+1)	56266.9	62432.1	52136.3	53602	0.0309115	0.89322	119571	52869.2	56109.3	2.13103	0.942252	-1.17736	no
XP_003128111.2 (+4)	102837	113317	91405.9	100721	0.0536897	0.890937	182964	96063.3	102070	1.79253	0.941151	-0.929502	no
XP_020947250.1	318294	273276	244589	279018	0.124173	0.89027	375743	261804	278794	1.34774	0.939057	-0.521262	no
XP_005662275.1 (+2)	115698	114898	107950	97289.7	0.0260763	0.890049	150575	102620	108959	1.38194	0.941821	-0.553173	no
NP_001090990.2	185364	158048	160254	143431	0.114384	0.88995	220728	151843	161774	1.36442	0.938608	-0.539693	no
XP_020931177.1 (+1)	86475.3	82952.6	77397.5	73222.5	0.00838969	0.889377	102522	75310	80012	1.28133	0.941234	-0.445021	no
XP_020922853.1 (+11)	90774.5	88292.3	79573.5	79573.5	0.00057106	0.888928	141135	79573.5	84553.4	1.66918	0.941103	-0.826715	no
XP_001926853.1 (+1)	87076.8	88906.4	77935.9	78478	0.000283473	0.888896	140679	78206.9	83099.3	1.6929	0.941127	-0.847037	no
XP_020921525.1 (+1)	113317	97289.7	91405.9	94629.3	0.0686896	0.888477	206643	93017.6	99160.4	2.08393	0.938052	-1.15157	no
NP_001231672.1	124864	100721	102837	95287.5	0.151673	0.888448	154809	99062.3	105927	1.46146	0.935191	-0.644078	no
NP_001038078.1 (+3)	28924.4	22381.2	21469.5	23331.6	0.200987	0.887658	58252.6	22400.6	24026.7	2.4245	0.93232	-1.37879	no
XP_003360303.2 (+2)	414209	329519	290867	360590	0.255607	0.887442	428374	325729	348796	1.22815	0.933865	-0.3952	no
NP_001038003.1	67847.1	76332	68794.2	58656.4	0.112358	0.887046	136641	63725.3	67907.4	2.01217	0.938414	-1.10046	no
NP_001231920.1	28329.2	22851.5	20882.4	23987.6	0.181912	0.886857	109575	22435	24012.7	4.5632	0.934299	-2.28809	no
NP_999138.1	125733	123145	114898	105728	0.0140312	0.886582	153097	110313	117376	1.30433	0.939828	-0.472838	no
NP_001230560.1	69754.6	68319	58656.4	63743.9	0.0140312	0.886582	141969	61200.1	65118.5	2.18017	0.939828	-1.21397	no
XP_001927405.1	96617.7	90774.5	80684.3	85284.7	0.0130278	0.886539	124947	82984.5	88340.3	1.41438	0.939373	-0.590401	no
NP_999514.1	130167	138545	115698	122295	0.0130278	0.886539	181230	118996	126676	1.43066	0.939373	-0.606907	no
XP_020951589.1 (+3)	145433	126607	108701	131072	0.150255	0.885626	181044	119886	127953	1.41492	0.936953	-0.594671	no
NP_001106909.1 (+2)	111757	160254	126607	106464	0.339658	0.884977	145916	116535	126270	1.15559	0.922904	-0.324371	no
XP_020942403.1	110218	114898	109457	89524.8	0.113575	0.884287	143443	99490.7	106024	1.35293	0.938375	-0.527848	no
NP_001231489.1 (+2)	85284.7	69754.6	67378.5	68319	0.108832	0.884117	152663	67848.8	72684.2	2.10036	0.933473	-1.16996	no
XP_001929518.1 (+1)	76862.9	70728.3	65536	64633.7	0.0123181	0.883488	132741	65084.9	69440.2	1.91159	0.937279	-1.02822	no
XP_005668301.1	40622.7	32093.6	34397.1	28924.4	0.213951	0.882949	162072	31660.8	34009.5	4.76551	0.930939	-2.35587	no
NP_001177133.1	85877.9	100721	79573.5	84110.6	0.0719832	0.882784	157594	81842	87570.7	1.79962	0.934583	-0.945295	no
NP_999483.1	134757	107204	104273	106464	0.13682	0.882393	167982	105368	113174	1.48428	0.931025	-0.672872	no
XP_020924399.1 (+18)	208545	186653	167059	180295	0.0407393	0.881642	280760	173677	185638	1.5124	0.935568	-0.692928	no
XP_020950145.1	63743.9	59888.9	48983.2	59888.9	0.113131	0.881466	98621.2	54436	58126.2	1.69667	0.936514	-0.857336	no
XP_020954717.1 (+6)	65991.8	58656.4	54728.3	54728.3	0.0285879	0.881176	92423.9	54728.3	58526.2	1.57919	0.935108	-0.755978	no
XP_003354344.1 (+3)	40905.3	28329.2	25531.7	33456.5	0.379276	0.881078	116186	29494.1	32055.7	3.62452	0.92009	-1.97794	no
NP_001116693.1	152664	137588	126607	128375	0.0208531	0.880859	213389	127491	136309	1.56548	0.935311	-0.743091	no
NP_001230269.1	112534	162491	110985	123145	0.301695	0.880351	129147	117065	127289	1.0146	0.91968	-0.141702	no
NP_001302671.1	75281.1	54728.3	59064.4	52498.9	0.256932	0.880112	199283	55781.6	60393.2	3.29976	0.923641	-1.83695	no
XP_020940725.1	148489	144429	131984	125733	0.00347365	0.879993	219710	128858	137659	1.59605	0.93607	-0.769814	no
XP_003126645.3	66450.8	56658.3	54728.3	52864.1	0.0617994	0.879524	116118	53796.2	57675.4	2.0133	0.932741	-1.11001	no
XP_003125251.2 (+2)	81245.5	102127	73222.5	85877.9	0.185365	0.879036	111608	79550.2	85618.2	1.30355	0.929128	-0.488501	no
XP_020950925.1	82379.6	71220.3	72716.7	61572.6	0.11956	0.878919	106534	67144.7	71972.3	1.48021	0.932924	-0.66597	no
XP_020920024.1 (+4)	77935.9	68319	65083.3	62866.3	0.0389792	0.878639	145783	63974.8	68551.1	2.12663	0.933242	-1.18825	no
XP_020920317.1 (+1)	69272.7	66450.8	56266.9	62866.3	0.0269123	0.878144	103196	59566.6	63714.2	1.61967	0.934903	-0.792815	no
NP_001038006.1 (+2)	136638	134757	107204	131072	0.0961643	0.87801	155328	119138	127418	1.21905	0.935019	-0.382687	no
NP_001177139.1 (+8)	106464	111757	92041.7	99334	0.012761	0.877501	136616	95687.9	102399	1.33416	0.934461	-0.513721	no
XP_020921945.1 (+1)	277091	242900	236257	217401	0.0515307	0.876225	322794	226829	243412	1.32612	0.931873	-0.509006	no
XP_013834643.1 (+5)	139509	143431	114898	132902	0.0452088	0.875972	165397	123900	132685	1.24654	0.93379	-0.416758	no
XP_020931398.1	73731.8	66450.8	63303.6	59064.4	0.028916	0.875279	119119	61184	65637.7	1.8148	0.932147	-0.961179	no
NP_001011727.1	174154	144429	132902	143431	0.0913872	0.875	221141	138166	148729	1.48688	0.928982	-0.678561	no
XP_020925466.1	64633.7	69754.6	63743.9	53602	0.078252	0.874455	157316	58673	62933.6	2.49971	0.9323	-1.42289	no
XP_003355772.1	62866.3	52864.1	51776.1	48644.9	0.073136	0.874245	118745	50210.5	54037.9	2.19743	0.929173	-1.2418	no
XP_020925004.1	182812	150562	133826	154795	0.131284	0.873936	197784	144311	155499	1.27193	0.92805	-0.454749	no
XP_003133228.3 (+2)	116502	121450	102127	105728	0.00268683	0.873893	171611	103927	111452	1.53978	0.932488	-0.723569	no
XP_020925858.1	59064.4	33225.4	32541.7	41764.8	0.475791	0.873623	95171.6	37153.2	41649.1	2.28508	0.892054	-1.35704	no
XP_003482893.1	185364	248003	211456	159147	0.304343	0.873419	197441	185302	200993	0.98233	0.921933	-0.0915462	no
XP_003133517.2	138545	142441	113317	131984	0.0474064	0.873166	213307	122650	131572	1.62122	0.932193	-0.798379	no
XP_003483683.2	156956	99334	116502	95950.3	0.380952	0.873088	212065	106226	117186	1.80965	0.906479	-0.997364	no
NP_001233172.1	82952.6	60724.9	62000.8	60305.4	0.200602	0.872129	112897	61153.1	66495.9	1.6978	0.919652	-0.88451	no
NP_001070686.1 (+2)	33689.2	48308.9	32316.9	36865.9	0.272007	0.871413	58351.2	34591.4	37795.2	1.54388	0.915232	-0.754349	no
NP_001156363.1 (+5)	211456	135694	148489	139509	0.329255	0.871096	362018	143999	158787	2.2799	0.906869	-1.33	no
XP_003123248.1	68794.2	67847.1	61572.6	57449.2	0.00540376	0.871094	95969.4	59510.9	63915.8	1.5015	0.931083	-0.68942	no
XP_020954563.1	50012.5	37380.5	38166	36358.4	0.178312	0.870946	96675.7	37262.2	40479.3	2.38827	0.920523	-1.37544	no
XP_003134744.2	69272.7	60305.4	58251.2	53974.9	0.0468885	0.870256	97798.9	56113	60451.1	1.61782	0.928239	-0.801483	no
XP_020926737.1	85877.9	91405.9	74761.1	79023.8	0.00809486	0.868294	109048	76892.5	82767.2	1.31753	0.929021	-0.504055	no
XP_020938204.1 (+3)	84110.6	51776.1	51418.5	59888.9	0.371233	0.868281	122013	55653.7	61798.5	1.97437	0.900566	-1.13249	no
XP_013840899.1	110985	90774.5	87076.8	85877.9	0.0756327	0.865922	165335	86477.3	93678.5	1.76492	0.923129	-0.934997	no
XP_020935518.1	131072	93975.7	92041.7	97289.7	0.203781	0.864792	151243	94665.7	103595	1.45995	0.913808	-0.675955	no
XP_020919567.1	214408	185364	172951	170569	0.0333362	0.86385	227442	171760	185823	1.22397	0.924321	-0.405106	no
NP_001093666.1 (+1)	125733	111757	104273	100025	0.0218155	0.863229	158729	102149	110447	1.43715	0.924869	-0.635891	no
XP_003357441.2	33456.5	29944.4	26987.4	27554.5	0.0164354	0.862918	85232.7	27271	29485.7	2.89064	0.924887	-1.64404	no
XP_020940493.1	114105	110218	112534	80684.3	0.191866	0.861599	152007	96609.1	104385	1.45621	0.925505	-0.653909	no
XP_020946186.1 (+2)	110985	72214.5	72214.5	78478	0.286261	0.861128	342380	75346.2	83472.9	4.10169	0.902643	-2.18399	no
XP_020933911.1	28924.4	24154.4	24154.4	21173.9	0.087015	0.860934	98679	22664.2	24601.8	4.01105	0.92124	-2.12233	no
NP_001157986.1	175365	149522	148489	129267	0.0761897	0.860377	191301	138878	150661	1.26974	0.921794	-0.462021	no
NP_001182255.1	141457	110218	101421	111757	0.125525	0.860292	217789	106589	116213	1.87405	0.917185	-1.03087	no
XP_020937187.1 (+1)	73731.8	59888.9	57449.2	56266.9	0.0736712	0.86027	112163	56858.1	61834.2	1.81394	0.919525	-0.980163	no
NP_001131101.1	72716.7	49323.9	50710.6	50360.3	0.237006	0.859763	107114	50535.5	55777.9	1.92036	0.906012	-1.08378	no
XP_003133041.1	313912	301124	239555	288858	0.0595159	0.859529	390775	264207	285862	1.367	0.924244	-0.564671	no
XP_013840075.2	50012.5	54350.3	45703	43841.2	0.00888597	0.859494	71631.3	44772.1	48476.7	1.47764	0.923579	-0.67799	no
XP_013844054.2 (+1)	118129	93326.6	92681.9	86475.3	0.102908	0.859077	175181	89578.6	97653.1	1.79391	0.917314	-0.967621	no
XP_005655974.2	71220.3	57052.4	52136.3	56658.3	0.0946148	0.858626	94230.7	54397.3	59266.8	1.58994	0.917837	-0.792662	no
XP_003480606.1 (+1)	58656.4	46341	44453.2	44453.2	0.0931057	0.858561	98443.1	44453.2	48475.9	2.03076	0.917016	-1.147	no
NP_001153080.1	112534	75804.7	81810.6	73731.8	0.252644	0.858517	148392	77771.2	85970.3	1.72608	0.904629	-0.932102	no
XP_001928795.3	107950	108701	107950	77935.9	0.174023	0.858009	120027	92942.8	100634	1.19271	0.923573	-0.368943	no
XP_020928303.1	46020.8	40342.1	39786.7	33923.6	0.0682894	0.8572	172628	36855.1	40018.3	4.31373	0.920957	-2.22773	no
XP_001927474.1	31872	26068.1	25180.2	23987.6	0.0679144	0.857197	109269	24583.9	26777	4.08073	0.918098	-2.15211	no
XP_020943163.1 (+1)	88906.4	65991.8	62432.1	67378.5	0.154558	0.856788	142138	64905.3	71177.2	1.99696	0.911883	-1.13089	no
XP_020942964.1 (+1)	110218	103552	93975.7	88906.4	0.00607738	0.85634	132912	91441.1	99163.1	1.34033	0.922128	-0.539553	no
NP_001231034.1	87076.8	75804.7	76332	62432.1	0.096854	0.856032	149943	69382	75411.4	1.98833	0.920047	-1.11178	no
XP_020941134.1	373306	462791	368167	338783	0.0839711	0.855333	395227	353475	385762	1.02454	0.916304	-0.161074	no
XP_013838372.2 (+1)	156956	139509	121450	131072	0.0246856	0.854736	201102	126261	137247	1.46526	0.919956	-0.67152	no
XP_020945770.1 (+4)	46341	31872	27939.1	36611.3	0.290009	0.854562	125914	32275.2	35690.8	3.52792	0.9043	-1.96395	no
XP_020918853.1 (+6)	150562	152664	149522	109457	0.15209	0.854119	182214	129489	140551	1.29642	0.921297	-0.4928	no
XP_005673709.1 (+15)	81810.6	76862.9	70239.7	65083.3	0.00915098	0.85367	135785	67661.5	73499.1	1.84744	0.920576	-1.00492	no
XP_003125491.1	69754.6	68794.2	57848.8	60305.4	0.000853118	0.85284	137602	59077.1	64175.8	2.14414	0.920552	-1.21983	no
XP_003129255.3	138545	153726	136638	111757	0.0763415	0.852176	178609	124197	135166	1.3214	0.918847	-0.52417	no
XP_020938935.1	72214.5	43237.6	43538.4	48644.9	0.327312	0.852134	115153	46091.6	51908.8	2.21838	0.887934	-1.32098	no
XP_005666231.1	119778	114105	110218	88906.4	0.0711378	0.851888	176045	99562.2	108252	1.62625	0.919728	-0.822271	no
NP_001231941.1 (+3)	55109	46020.8	45073.8	40342.1	0.0646647	0.851493	240473	42707.9	46636.4	5.15633	0.915764	-2.4933	no
NP_001231427.1 (+2)	89524.8	79573.5	71220.3	72214.5	0.0144965	0.851181	159765	71717.4	78133.2	2.04477	0.917885	-1.15555	no
XP_020949473.1	80684.3	71715.6	64633.7	64633.7	0.0142169	0.85116	121026	64633.7	70416.9	1.71871	0.917873	-0.904963	no
NP_001155111.1	39786.7	24154.4	28133.5	23010.4	0.335069	0.850706	63774.3	25571.9	28771.3	2.2166	0.888802	-1.31841	no
XP_003483226.1	256749	253214	226633	207105	0.00684279	0.850568	273133	216869	235925	1.15771	0.919227	-0.332781	no
XP_003124656.3 (+2)	134757	154795	124002	120611	0.0221781	0.848862	213235	122306	133541	1.59677	0.91587	-0.801945	no
NP_001038038.1 (+1)	95287.5	106464	84695.6	85877.9	0.0114886	0.848068	119950	85286.8	93081.2	1.28865	0.916263	-0.492033	no
XP_003359584.2 (+1)	64187.3	45387.3	43841.2	46341	0.172094	0.847983	126619	45091.1	49939.2	2.53547	0.90292	-1.48958	no
XP_003124136.1 (+4)	138545	125733	113317	110218	0.00859088	0.847824	181188	111767	121953	1.48572	0.916477	-0.696988	no
XP_020927322.1	64187.3	43841.2	43841.2	44453.2	0.196471	0.847384	180690	44147.2	49080.7	3.68148	0.899482	-2.03312	no
NP_001124006.1	131072	88292.3	85877.9	92681.9	0.211455	0.846169	161225	89279.9	99481	1.62066	0.897457	-0.852665	no
XP_003131544.1	158048	159147	147464	120611	0.0506299	0.845152	193412	134037	146317	1.32187	0.916073	-0.529042	no
XP_003481357.1 (+1)	76332	63303.6	56658.3	60305.4	0.0482743	0.844992	84696.1	58481.9	64149.8	1.32029	0.911645	-0.534306	no
XP_001929310.3	138545	107950	102837	102127	0.0826385	0.844523	232521	102482	112865	2.06018	0.908006	-1.18199	no
NP_001028187.3 (+1)	142441	135694	126607	107950	0.0308564	0.843818	185678	117278	128173	1.44865	0.915002	-0.662866	no
XP_020933012.1 (+7)	85284.7	80127	71715.6	67378.5	0.00513526	0.841715	136348	69547	76126.4	1.79107	0.913573	-0.971233	no
XP_005660855.3	100025	85877.9	74761.1	80684.3	0.0310556	0.841035	138191	77722.7	85337.1	1.61935	0.910773	-0.830255	no
XP_013845109.2	136638	112534	99334	107950	0.0517837	0.839749	185283	103642	114114	1.62367	0.908232	-0.838123	no
XP_020936728.1 (+6)	492581	370728	378517	331810	0.123886	0.839523	573265	355164	393409	1.45717	0.902786	-0.690717	no
NP_001153565.1	139509	140479	119778	114898	0.000544476	0.838173	164689	117338	128666	1.27997	0.911957	-0.489075	no
XP_003483491.1	82952.6	80684.3	62866.3	74244.7	0.0284231	0.838059	117589	68555.5	75187	1.56395	0.9118	-0.778409	no
NP_999120.1	62866.3	47975.2	43237.6	47975.2	0.102964	0.838038	95408	45606.4	50513.6	1.88876	0.902854	-1.06487	no
NP_001230636.1 (+3)	66450.8	32768	36865.9	36611.3	0.393747	0.837021	165099	36738.6	43174	3.82403	0.850942	-2.16796	no
XP_005656086.1 (+1)	172951	156956	131984	143431	0.0131979	0.836794	225449	137707	151330	1.48978	0.909979	-0.711197	no
XP_003122968.6 (+1)	57848.8	49323.9	41764.8	47314.7	0.0441453	0.836469	61222.3	44539.7	49063.1	1.24783	0.907806	-0.458963	no
NP_001231740.1	110218	124864	90774.5	104998	0.0382131	0.836028	142312	97886.2	107714	1.3212	0.908763	-0.539876	no
XP_003127220.1 (+1)	114105	85284.7	79023.8	84110.6	0.104694	0.835628	138596	81567.2	90631	1.52924	0.899992	-0.764829	no
NP_001034839.1	234625	233005	198668	191901	0.000302014	0.835218	243528	195284	214550	1.13507	0.910205	-0.318511	no
XP_001929410.3 (+2)	69272.7	60305.4	51776.1	55878.3	0.0226306	0.834805	96827.2	53827.2	59308.1	1.63261	0.907586	-0.847077	no
NP_001230605.1 (+1)	86475.3	70728.3	67847.1	62000.8	0.0521308	0.834358	125174	64924	71762.9	1.74427	0.904701	-0.947112	no
XP_003356898.2	23821.9	16728.3	16046.8	16728.3	0.144893	0.833776	50997	16387.5	18331.3	2.78196	0.893965	-1.63781	no
XP_020940339.1	229797	187951	171756	172951	0.0408892	0.833517	261230	172353	190614	1.37047	0.904202	-0.599953	no
XP_003132827.4 (+1)	80127	86475.3	71220.3	67378.5	0.00518261	0.833124	109455	69299.4	76300.2	1.43453	0.908246	-0.659426	no
NP_001123447.1	106464	102127	90147.5	83529.6	0.00407788	0.832984	152484	86838.6	95566.8	1.59558	0.908668	-0.812254	no
XP_020950929.1	80127	76332	70728.3	59475.2	0.0304017	0.832679	166005	65101.7	71665.6	2.31638	0.90841	-1.35046	no
XP_020951139.1 (+16)	141457	97289.7	93975.7	97966.4	0.157892	0.832447	174225	95971.1	107672	1.6181	0.891327	-0.860277	no
XP_003483607.1 (+5)	218913	161369	145433	163621	0.120165	0.831744	287708	154527	172334	1.66947	0.896673	-0.896741	no
NP_001231560.1	65536	50360.3	45703	48983.2	0.080747	0.831243	97408	47343.1	52645.6	1.85026	0.899279	-1.04089	no
NP_999331.1	72716.7	69272.7	62432.1	55492.3	0.0116378	0.831004	91277.9	58962.2	64978.5	1.40474	0.907411	-0.630476	no
XP_001929109.1 (+3)	71220.3	65083.3	54350.3	58656.4	0.0093631	0.830765	188533	56503.3	62327.6	3.02487	0.906555	-1.73841	no
XP_001928821.1 (+1)	221969	197296	187951	159147	0.0405061	0.830751	913771	173549	191591	4.76939	0.905832	-2.39649	no
NP_001302557.1	128375	104998	95950.3	95950.3	0.038755	0.830628	208502	95950.3	106318	1.96111	0.902482	-1.1197	no
XP_020929559.1 (+9)	7538.18	6746.86	5873.48	5955.47	0.0079833	0.830615	57550.6	5914.48	6528.5	8.8153	0.905948	-3.28251	no
XP_020950252.1	74761.1	64187.3	60724.9	53974.9	0.0348515	0.830293	133012	57349.9	63412	2.09759	0.9044	-1.2137	no
XP_020954808.1 (+15)	58251.2	48983.2	43841.2	44453.2	0.0261863	0.829574	142947	44147.2	48882.2	2.92431	0.903135	-1.69508	no
XP_003133809.1	30152.7	17805.1	20031.7	17079.8	0.277321	0.828777	108089	18555.7	21267.3	5.08238	0.872501	-2.54228	no
XP_003130208.3 (+6)	69754.6	55109	54728.3	47314.7	0.0809892	0.828636	96555.6	51021.5	56726.6	1.70212	0.899428	-0.920254	no
XP_001928501.1 (+5)	100025	77397.5	74761.1	69754.6	0.0724825	0.827996	155903	72257.8	80484.5	1.93706	0.897785	-1.10942	no
XP_020934889.1	50360.3	54350.3	48644.9	37902.4	0.0693183	0.827739	90147.1	43273.6	47814.5	1.88535	0.905032	-1.05879	no
XP_020951123.1	84695.6	62866.3	62000.8	57449.2	0.0993764	0.827602	153968	59725	66753	2.30654	0.894717	-1.36623	no
XP_020936079.1	69272.7	58656.4	54350.3	50710.6	0.0274869	0.826938	97997.4	52530.4	58247.5	1.68243	0.901849	-0.899589	no
XP_001928049.1 (+2)	87682.4	92041.7	73222.5	75281.1	0.000985256	0.826773	150549	74251.8	82056.9	1.83469	0.904882	-1.01973	no
XP_020935718.1	187951	171756	156956	139509	0.0160355	0.825858	267525	148233	164043	1.63082	0.90362	-0.851811	no
XP_020940639.1	93975.7	65536	62000.8	65536	0.136096	0.825796	168737	63768.4	71762.1	2.35133	0.888608	-1.40386	no
XP_020922655.1	167059	137588	127488	121450	0.0345958	0.824852	199153	124469	138396	1.439	0.899365	-0.678092	no
NP_001230846.1 (+1)	80684.3	63743.9	64187.3	53231.8	0.0911774	0.824333	116048	58709.5	65461.8	1.77277	0.896852	-0.98306	no
NP_001038019.1	51063.3	37122.3	40063.5	30786.3	0.170868	0.824009	91405.5	35424.9	39758.9	2.299	0.890993	-1.36752	no
XP_020923146.1 (+2)	193235	234625	155872	193235	0.082919	0.823644	212855	174554	194242	1.09582	0.89864	-0.2862	no
XP_020958118.1 (+29)	3.83289e+06	1.3836e+06	1.64539e+06	1.70342e+06	0.487258	0.823514	3.86498e+06	1.6744e+06	2.14133e+06	1.80495	0.781948	-1.20681	no
NP_999143.1 (+1)	129267	160254	113317	122295	0.046716	0.823225	206130	117806	131283	1.57012	0.89734	-0.80715	no
XP_020924545.1 (+1)	97966.4	100025	90147.5	72716.7	0.0402927	0.822672	191942	81432.1	90213.9	2.12763	0.902656	-1.237	no
NP_001230533.1 (+7)	104998	116502	87076.8	94629.3	0.0111748	0.822562	142378	90853	100802	1.41246	0.901306	-0.648123	no
XP_020937736.1 (+1)	201441	169391	135694	167059	0.0699596	0.82256	295417	151377	168397	1.75429	0.89893	-0.964609	no
XP_020920371.1 (+3)	141457	155872	124864	118950	0.00618789	0.82195	199708	121907	135286	1.47619	0.90111	-0.712107	no
XP_020945711.1	62866.3	53602	49667	45387.3	0.0259327	0.821335	94738.3	47527.1	52880.7	1.79155	0.898762	-0.995196	no
XP_020929056.1 (+1)	113317	111757	103552	81245.5	0.0524227	0.821096	147006	92398.9	102468	1.43466	0.901736	-0.669926	no
NP_001172115.1	94629.3	79573.5	70728.3	71220.3	0.0222128	0.820979	265199	70974.3	79037.8	3.35534	0.897978	-1.90171	no
NP_001070687.1	195933	138545	107950	158048	0.233803	0.819381	271738	132999	150119	1.81015	0.885955	-1.0308	no
XP_003122689.1 (+1)	62000.8	57449.2	46663.3	51063.3	0.00748388	0.819327	124867	48863.3	54294.2	2.29983	0.899973	-1.35357	no
XP_020921514.1 (+7)	134757	125733	103552	109457	0.00325839	0.818708	155785	106504	118375	1.31603	0.899724	-0.548639	no
XP_020929375.1	246290	159147	174154	142441	0.205575	0.818692	277723	158297	180508	1.53857	0.876954	-0.811015	no
XP_020941195.1	155872	149522	138545	110985	0.0411977	0.817429	235445	124765	138731	1.69713	0.899331	-0.916178	no
NP_001116459.1	70728.3	64187.3	62000.8	47975.2	0.0656841	0.817067	156013	54988	61222.9	2.54828	0.898161	-1.50448	no
XP_020939461.1 (+6)	79573.5	70728.3	62432.1	59888.9	0.00834407	0.816664	106189	61160.5	68155.7	1.55804	0.897364	-0.795968	no
XP_003133959.4	94629.3	80684.3	80684.3	61572.6	0.0888306	0.816609	119121	71128.4	79392.6	1.5004	0.895907	-0.743929	no
XP_020945699.1	53231.8	39239	35857.8	37902.4	0.0852848	0.816352	187989	36880.1	41557.7	4.52356	0.887442	-2.34973	no
XP_003131673.5	81245.5	64187.3	55492.3	61572.6	0.0559658	0.81617	110170	58532.4	65624.4	1.67879	0.891931	-0.912422	no
XP_020944034.1	160254	153726	149522	106464	0.104097	0.815646	205016	127993	142491	1.4388	0.89825	-0.679675	no
XP_020940276.1 (+2)	212927	187951	177813	147464	0.0392072	0.814571	308877	162638	181539	1.70144	0.895887	-0.925368	no
XP_003480848.1	91405.9	74761.1	65991.8	67847.1	0.0294581	0.813612	133461	66919.5	75001.5	1.77945	0.892242	-0.995922	no
NP_001095292.1	182812	187951	143431	158048	0.00425069	0.813287	235676	150739	168061	1.40233	0.896935	-0.644747	no
XP_003125080.1	140479	116502	101421	105728	0.0252265	0.813164	225175	103575	116033	1.94062	0.892633	-1.12038	no
XP_013841780.1	88906.4	63743.9	58656.4	62000.8	0.0966983	0.812492	137215	60328.6	68326.9	2.00822	0.882941	-1.18553	no
XP_020954454.1	62000.8	67378.5	46663.3	58251.2	0.0428184	0.81231	124867	52457.2	58573.4	2.13181	0.895581	-1.25118	no
XP_020926905.1 (+5)	299044	341139	249728	267652	0.0124211	0.811685	327769	258690	289391	1.13262	0.893913	-0.341454	no
NP_001123433.1	195933	151609	149522	127488	0.0742361	0.810232	237698	138505	156138	1.52236	0.887067	-0.77919	no
NP_999198.1	159147	125733	116502	110985	0.0425159	0.809676	223781	113743	128092	1.74704	0.887985	-0.976302	no
XP_020944077.1	57052.4	42055.3	41764.8	36611.3	0.0901922	0.80935	103716	39188	44370.9	2.33747	0.883191	-1.40415	no
XP_001928763.2	77397.5	62866.3	53974.9	58251.2	0.0341051	0.808787	104573	56113	63122.5	1.65666	0.888955	-0.898098	no
XP_020931126.1	148489	159147	138545	109457	0.0430137	0.807122	181715	124001	138910	1.30815	0.892674	-0.551323	no
XP_003131714.1 (+3)	172951	170569	139509	137588	2.89878e-05	0.806681	228443	138549	155154	1.47236	0.892974	-0.721439	no
XP_001927580.3 (+1)	69272.7	53231.8	51063.3	46020.8	0.0600238	0.80632	116261	48542.1	54897.2	2.11779	0.884237	-1.26005	no
XP_020934391.1 (+1)	57052.4	48983.2	42055.3	42939	0.012324	0.806232	80062.8	42497.1	47757.5	1.67645	0.889853	-0.913767	no
XP_003128673.2	246290	269514	234625	180295	0.0573418	0.806049	333973	207460	232681	1.43532	0.891607	-0.686895	no
NP_999504.1	65083.3	57848.8	45387.3	53231.8	0.0240921	0.805011	108925	49309.5	55387.8	1.96658	0.89026	-1.14339	no
NP_001231322.1	101421	89524.8	82379.6	70728.3	0.0236914	0.804963	176702	76554	86013.5	2.05436	0.890023	-1.20677	no
XP_003132469.4	204253	191901	154795	163621	0.00207739	0.804551	248399	159208	178643	1.39048	0.891211	-0.641748	no
NP_001038025.1	111757	84110.6	77397.5	76862.9	0.0577402	0.803586	186518	77130.2	87531.9	2.13085	0.881167	-1.27394	no
XP_020948754.1	134757	105728	102127	88292.3	0.0576525	0.80352	257902	95209.5	107726	2.39406	0.883811	-1.43765	no
XP_003130728.1	152664	169391	123145	134757	0.008533	0.802967	208931	128951	144989	1.44101	0.889383	-0.696203	no
XP_001927005.6	147464	96617.7	95287.5	92041.7	0.13386	0.802303	187250	93664.6	107853	1.73617	0.86845	-0.999393	no
NP_001129152.1	133826	125733	108701	99334	0.00439927	0.802273	190093	104017	116898	1.62614	0.88981	-0.869882	no
NP_999471.1	73731.8	57449.2	53231.8	50360.3	0.0437306	0.802045	125868	51796	58693.3	2.14451	0.882487	-1.281	no
XP_020926771.1 (+2)	85877.9	83529.6	69754.6	65991.8	0.000815807	0.801455	166562	67873.2	76288.5	2.18332	0.889691	-1.29515	no
NP_999225.1 (+1)	99334	129267	85284.7	94629.3	0.0551682	0.80075	147979	89957	102129	1.44894	0.880819	-0.718083	no
XP_005663223.1 (+1)	121450	93326.6	85284.7	83529.6	0.0456552	0.799712	165903	84407.2	95897.7	1.73	0.88018	-0.974902	no
NP_001231843.1	70728.3	54350.3	48644.9	49667	0.0456552	0.799712	148664	49155.9	55847.6	2.66196	0.88018	-1.59662	no
XP_001928714.1	81245.5	66450.8	59064.4	57848.8	0.0229947	0.799601	179893	58456.6	66152.4	2.71938	0.883666	-1.6217	no
XP_003121268.1	118950	110985	88906.4	94629.3	0.00260206	0.799166	161889	91767.9	103368	1.56615	0.887781	-0.818947	no
XP_020946833.1	110218	93975.7	85284.7	76862.9	0.0195622	0.799144	123162	81073.8	91585.3	1.34478	0.885227	-0.603249	no
XP_020947847.1 (+12)	63743.9	46020.8	41476.3	43841.2	0.0754408	0.798083	129736	42658.8	48770.6	2.66012	0.874682	-1.60466	no
XP_020950648.1	104273	175365	101421	107204	0.184306	0.797608	176487	104313	122066	1.44584	0.854562	-0.758648	no
XP_013836785.1 (+1)	120611	87682.4	82952.6	79023.8	0.0708686	0.797569	169935	80988.2	92567.4	1.83579	0.874911	-1.0692	no
XP_020949663.1	76862.9	150562	92041.7	70239.7	0.301271	0.797287	163940	81140.7	97426.6	1.6827	0.832839	-1.01467	no
NP_999088.1	99334	88292.3	74761.1	74244.7	0.00493549	0.796922	206538	74502.9	84158	2.45417	0.885274	-1.47104	no
XP_003122047.1	145433	149522	124002	110985	0.00449685	0.796836	368947	117493	132485	2.78481	0.886838	-1.65084	no
XP_003126100.2 (+3)	236257	246290	201441	182812	0.00356416	0.796645	374803	192127	216700	1.72959	0.886601	-0.964075	no
XP_005660266.1	152664	112534	114898	91405.9	0.10196	0.796157	174737	103152	117876	1.48239	0.875094	-0.760411	no
XP_020949399.1 (+1)	93326.6	79573.5	68794.2	67847.1	0.0113492	0.795323	126552	68320.7	77385.3	1.63535	0.882863	-0.889336	no
XP_020940420.1	146445	112534	110985	91405.9	0.0717579	0.795127	233522	101195	115342	2.0246	0.877347	-1.20642	no
XP_020939876.1 (+3)	109457	104273	96617.7	73222.5	0.0497115	0.795119	137590	84920.1	95892.4	1.43484	0.885578	-0.696199	no
XP_003134736.2 (+1)	193235	161369	144429	134757	0.0185276	0.793727	290525	139593	158447	1.83357	0.881005	-1.05744	no
XP_003358716.1	101421	97289.7	77935.9	79573.5	0.000296941	0.792998	182105	78754.7	89055.1	2.04486	0.884337	-1.20934	no
XP_003128384.1	124864	88906.4	75804.7	88906.4	0.0937868	0.792939	151480	82355.6	94620.4	1.60092	0.870378	-0.87919	no
XP_005660461.2 (+8)	159147	155872	116502	132902	0.00639231	0.791798	222013	124702	141106	1.57338	0.883749	-0.832161	no
XP_001924932.2 (+2)	234625	197296	185364	153726	0.0369818	0.790981	309387	169545	192753	1.6051	0.879598	-0.867744	no
XP_005654480.2	102837	85877.9	82379.6	65536	0.0507722	0.790186	130583	73957.8	84157.6	1.55165	0.878801	-0.820194	no
XP_020918932.1 (+3)	46020.8	25888.1	25180.2	27175.1	0.201951	0.790004	109765	26177.7	31066.1	3.53327	0.842645	-2.06801	no
XP_020931475.1	126607	131984	107950	95950.3	0.00505151	0.788845	198822	101950	115623	1.71957	0.881747	-0.963613	no
NP_999002.1	156956	144429	113317	124002	0.00479011	0.788789	220260	118659	134676	1.63548	0.881073	-0.892381	no
XP_013840613.1 (+1)	130167	98647.9	76862.9	100025	0.0924447	0.788014	192599	88443.9	101426	1.89892	0.872008	-1.12276	no
XP_020942404.1	226633	174154	139509	170569	0.0661034	0.787171	273297	155039	177716	1.53782	0.872398	-0.817833	no
NP_001171386.1	254976	214408	169391	197296	0.0269003	0.787089	365194	183343	209018	1.74719	0.877167	-0.994113	no
NP_001157982.1	305328	447026	341139	229797	0.184719	0.786774	346518	285468	330823	1.04744	0.862904	-0.2796	no
NP_001230831.1 (+2)	316095	277091	211456	253214	0.0244742	0.786749	368232	232335	264464	1.39237	0.878513	-0.664405	no
XP_003356949.1 (+2)	65083.3	44146.1	39511.9	43237.6	0.0970877	0.786471	131534	41374.8	47994.8	2.74059	0.862069	-1.66861	no
XP_020925098.1	68794.2	66450.8	51776.1	54350.3	0.000538987	0.784933	117103	53063.2	60342.9	1.94063	0.879362	-1.142	no
XP_020923425.1	165905	174154	135694	131072	0.000538987	0.784933	221784	133383	151706	1.46193	0.87922	-0.733576	no
NP_001157477.2	69272.7	56266.9	46020.8	51418.5	0.027232	0.784585	114035	48719.7	55744.8	2.04567	0.873978	-1.2269	no
XP_020920344.1	175365	194579	172951	116502	0.0999383	0.784539	276085	144726	164849	1.67477	0.877932	-0.931786	no
NP_001230113.1	164759	161369	145433	110218	0.0408004	0.783984	180046	127826	145445	1.2379	0.878861	-0.494188	no
XP_020950676.1	129267	53231.8	60305.4	57848.8	0.33433	0.783412	175288	59077.1	75163.4	2.3321	0.785983	-1.56906	no
XP_020955323.1 (+4)	180295	125733	133826	97966.4	0.135579	0.782291	271070	115896	134455	2.01606	0.86197	-1.22583	no
XP_003135104.1 (+1)	154795	149522	132902	104998	0.0267242	0.781983	203440	118950	135554	1.5008	0.877507	-0.774251	no
NP_999446.1 (+5)	42642.4	55492.3	29944.4	45387.3	0.141466	0.781027	74294.2	37665.8	43366.6	1.71317	0.868545	-0.979992	no
XP_020923552.1	137588	127488	113317	93326.6	0.0184676	0.780695	187601	103322	117930	1.59078	0.876127	-0.860525	no
XP_020922184.1	146445	144429	123145	103552	0.010954	0.779404	149402	113349	129393	1.15464	0.876004	-0.398434	no
XP_005662035.1 (+2)	149522	126607	100025	113317	0.017628	0.777972	160948	106671	122368	1.31528	0.871723	-0.593429	no
XP_020951683.1	112534	124864	90147.5	93975.7	0.00304257	0.777686	169192	92061.6	105380	1.60554	0.873613	-0.877992	no
XP_003134939.5 (+8)	118950	93326.6	84695.6	77935.9	0.0303128	0.777457	193195	81315.8	93727.1	2.06125	0.86758	-1.24845	no
XP_020956294.1	322737	220436	198668	208545	0.0794781	0.777264	355963	203607	237597	1.49818	0.856942	-0.805941	no
NP_001041651.1 (+1)	65991.8	82379.6	56266.9	57449.2	0.0203779	0.775894	120342	56858.1	65521.9	1.83667	0.867772	-1.0817	no
XP_020954316.1	102127	104273	85284.7	74761.1	0.00485208	0.775503	132279	80022.9	91611.3	1.44392	0.873505	-0.725103	no
XP_020948050.1 (+1)	136638	132902	118129	90774.5	0.0316909	0.775186	182979	104452	119611	1.52979	0.873263	-0.808843	no
XP_020949606.1 (+3)	92681.9	96617.7	77397.5	69272.7	0.00343109	0.77514	155548	73335.1	83992.5	1.85193	0.873116	-1.08479	no
XP_020942162.1	117313	111757	97289.7	80127	0.0150463	0.774967	138195	88708.3	101621	1.3599	0.872929	-0.639565	no
XP_020939868.1 (+1)	88906.4	89524.8	75804.7	62432.1	0.0138009	0.774744	118851	69118.4	79167	1.50127	0.873071	-0.78201	no
XP_003356665.3	163621	201441	186653	92681.9	0.247015	0.773472	187115	139668	161099	1.16149	0.866965	-0.42193	no
NP_999066.1	34159.5	30573.6	26068.1	23821.9	0.00570676	0.773075	68795.9	24945	28655.8	2.40077	0.870505	-1.46357	no
XP_020937170.1 (+1)	88906.4	92041.7	71715.6	67847.1	0.000562715	0.771518	185524	69781.4	80127.7	2.31536	0.870877	-1.41069	no
XP_020941323.1	146445	181549	119778	129267	0.0193112	0.768096	178097	124523	144260	1.23456	0.863183	-0.516254	no
XP_020948837.1	80684.3	97289.7	62000.8	73222.5	0.0243505	0.766465	126705	67611.7	78299.3	1.61821	0.863503	-0.90613	no
XP_003358137.2 (+6)	79573.5	63303.6	50360.3	57449.2	0.0270831	0.764475	136232	53904.8	62671.7	2.17374	0.860114	-1.33758	no
XP_020939699.1	93975.7	100025	70728.3	77397.5	0.00229148	0.764276	134039	74062.9	85531.6	1.56713	0.865913	-0.855831	no
NP_001230825.1	5712.87	5914.33	4067.71	4803.93	0.00794694	0.763236	80994	4435.82	5124.71	15.8046	0.865575	-4.19054	no
XP_020941837.1	35364.2	22851.5	24322.4	18053.6	0.133427	0.763172	82027.4	21188	25147.9	3.2618	0.842536	-1.95286	no
XP_020927993.1	158048	113317	99334	102127	0.0475032	0.763135	496830	100730	118206	4.20308	0.852158	-2.30225	no
XP_020951712.1	156956	148489	121450	110985	0.00197743	0.761554	228672	116217	134470	1.70054	0.864262	-0.976454	no
XP_020950941.1	59064.4	66450.8	54350.3	40905.3	0.0383341	0.761554	119789	47627.8	55192.7	2.17038	0.862936	-1.33062	no
XP_001925178.2 (+1)	154795	108701	92041.7	102127	0.0580807	0.760156	192961	97084.2	114416	1.68649	0.848519	-0.991002	no
XP_020943143.1	65536	60305.4	53974.9	41476.3	0.028336	0.759816	93669.5	47725.6	55323.1	1.69313	0.862669	-0.972816	no
XP_003132296.1 (+5)	124864	92681.9	76862.9	84695.6	0.0388031	0.759256	177728	80779.3	94776.2	1.87524	0.852316	-1.13762	no
XP_020942531.1	154795	125733	112534	97289.7	0.0216533	0.756075	197437	104912	122588	1.61058	0.855809	-0.912218	no
XP_020929955.1 (+13)	33456.5	41764.8	26987.4	29125.6	0.017183	0.755185	128744	28056.5	32833.6	3.92111	0.854506	-2.1981	no
NP_001230298.1 (+3)	82379.6	59888.9	53231.8	51418.5	0.0382425	0.754437	110319	52325.1	61729.7	1.78713	0.847649	-1.0761	no
XP_001925518.2 (+1)	59475.2	46987.8	42347.8	36865.9	0.0257092	0.754428	85724.6	39606.9	46419.2	1.84675	0.853243	-1.11396	no
XP_003126698.1	201441	69272.7	70728.3	84695.6	0.338811	0.753803	269288	77712	106534	2.52771	0.729454	-1.79294	no
NP_001171388.1 (+2)	200050	193235	156956	138545	0.00303994	0.751592	222743	147751	172197	1.29354	0.858035	-0.592218	no
XP_013836770.2	70239.7	63303.6	53602	46341	0.00757671	0.750418	115313	49971.5	58371.6	1.97551	0.856093	-1.20638	no
XP_013844828.2	90147.5	92041.7	70239.7	66450.8	0.000296208	0.750348	157526	68345.3	79720	1.97599	0.857317	-1.20468	no
XP_005667580.1	154795	113317	107204	88906.4	0.0494829	0.749386	250745	98055.2	116056	2.16056	0.844899	-1.35456	no
XP_001927971.1	86475.3	80127	65991.8	58656.4	0.00371196	0.749266	202173	62324.1	72812.6	2.77662	0.855952	-1.69773	no
XP_001927515.2	221969	150562	138545	130167	0.0581224	0.748827	244196	134356	160311	1.52326	0.838097	-0.861977	no
XP_003355451.1	107204	93326.6	80127	69272.7	0.0102501	0.748607	168777	74699.8	87482.6	1.92926	0.853883	-1.17594	no
XP_001924388.2	691802	677565	499457	524288	0.000201512	0.747685	734150	511872	598278	1.22711	0.855576	-0.520291	no
XP_005655317.1	170569	143431	123145	109457	0.0111211	0.746343	193421	116301	136651	1.41544	0.851082	-0.733882	no
XP_020945891.1 (+5)	161369	121450	110985	94629.3	0.0339884	0.741796	226002	102807	122108	1.85084	0.841934	-1.1364	no
XP_020937232.1	100025	76332	69754.6	58656.4	0.0326731	0.741515	142667	64205.5	76192	1.87247	0.84268	-1.15189	no
XP_003127167.2 (+1)	63303.6	56266.9	43841.2	44453.2	0.0019988	0.740996	74188.2	44147.2	51966.2	1.42762	0.849536	-0.748867	no
NP_001231675.1 (+3)	115698	105728	80684.3	82952.6	0.00100963	0.740516	166058	81818.5	96265.7	1.725	0.849923	-1.02119	no
XP_003124388.1	129267	85284.7	77397.5	74761.1	0.059881	0.740302	185926	76079.3	91677.7	2.02804	0.829856	-1.28915	no
NP_001230796.1 (+1)	239555	190575	149522	164759	0.0162181	0.740264	332237	157141	186103	1.78523	0.844375	-1.08016	no
XP_020921571.1 (+3)	70239.7	55878.3	44762.4	47314.7	0.0138233	0.739678	145001	46038.5	54548.8	2.65819	0.843988	-1.65515	no
NP_001230510.1	46987.8	52498.9	32093.6	41189.8	0.0205209	0.738883	115782	36641.7	43192.6	2.6806	0.848334	-1.65985	no
NP_001177176.1	174154	135694	126607	98647.9	0.0399673	0.738362	222129	112628	133776	1.66046	0.841913	-0.979836	no
XP_020931104.1 (+2)	55492.3	45387.3	35364.2	38166	0.010273	0.736278	286888	36765.1	43602.4	6.57962	0.843189	-2.96408	no
XP_020925396.1	97966.4	90147.5	67378.5	70728.3	0.000995318	0.735436	177540	69053.4	81555.2	2.17693	0.846708	-1.36236	no
XP_003122225.3 (+1)	105728	134757	96617.7	77397.5	0.03162	0.7343	139185	87007.6	103625	1.34316	0.839639	-0.677787	no
NP_999086.2	233005	191901	146445	162491	0.0106421	0.733938	306737	154468	183460	1.67195	0.841969	-0.989692	no
XP_020950329.1 (+1)	242900	231395	191901	154795	0.0102259	0.731401	319762	173348	205248	1.55793	0.844579	-0.88333	no
XP_020918037.1	71715.6	44453.2	38698.8	41476.3	0.0741842	0.730385	111228	40087.5	49086	2.26597	0.81668	-1.47229	no
XP_001927253.3	110218	123145	98647.9	71220.3	0.0332349	0.730154	171791	84934.1	100808	1.70414	0.842535	-1.01624	no
XP_020945454.1	100721	84695.6	75281.1	59064.4	0.0230804	0.730014	148696	67172.7	79940.4	1.86008	0.840285	-1.14642	no
XP_020945904.1	70728.3	45703	38698.8	42347.8	0.061633	0.729805	216162	40523.3	49369.5	4.37845	0.820817	-2.41529	no
XP_001926739.2	140479	129267	113317	82952.6	0.0276644	0.728864	169605	98134.6	116504	1.45579	0.842328	-0.789345	no
XP_020921551.1	93975.7	85284.7	63743.9	66450.8	0.00116719	0.728	152632	65097.4	77363.8	1.97291	0.841445	-1.22939	no
XP_005673365.1 (+7)	30573.6	21769.2	20738.2	16270.8	0.0526149	0.727637	54561.2	18504.5	22337.9	2.44253	0.828388	-1.56	no
XP_020947062.1 (+2)	154795	100721	89524.8	87682.4	0.0539541	0.726045	265780	88603.6	108181	2.45681	0.819033	-1.58479	no
XP_003131484.1	169391	113317	120611	76332	0.118936	0.725159	234025	98471.4	119913	1.95163	0.821193	-1.24889	no
XP_003127560.1	179050	185364	135694	128375	0.000268759	0.724858	208175	132034	157121	1.32494	0.840338	-0.656884	no
XP_020935506.1	163621	149522	118950	107204	0.00238691	0.723674	222686	113077	134824	1.65167	0.8387	-0.9777	no
XP_020935731.1	125733	137588	105728	84110.6	0.0122545	0.722404	135013	94919.4	113290	1.19175	0.837844	-0.508327	no
XP_005656840.2	105728	95950.3	74244.7	70728.3	0.0011329	0.720526	133092	72486.5	86662.9	1.53575	0.836419	-0.876643	no
NP_001116468.2	234625	462791	322737	125733	0.320045	0.720121	262372	224235	286471	0.915873	0.782748	-0.226601	no
NP_001090908.1	171756	159147	117313	120611	0.000475404	0.720059	247037	118962	142207	1.73717	0.836542	-1.05423	no
XP_013837146.1 (+11)	85284.7	66913.1	55492.3	52498.9	0.0122232	0.720037	173577	53995.6	65047.3	2.66848	0.830098	-1.68466	no
XP_013848913.1 (+3)	205674	147464	127488	119778	0.0276786	0.719753	258538	123633	150101	1.72243	0.823665	-1.06432	no
XP_020933495.1	296979	153726	163621	127488	0.142643	0.718481	328851	145555	185453	1.77323	0.784858	-1.17587	no
XP_020934927.1 (+7)	82379.6	79023.8	55109	60724.9	0.00100671	0.717977	160858	57916.9	69309.3	2.32086	0.83563	-1.47373	no
XP_020931434.1 (+5)	131984	123145	100721	81810.6	0.00816645	0.716307	157693	91265.6	109415	1.44124	0.834123	-0.788975	no
NP_001116685.1	123145	95950.3	81245.5	73222.5	0.0145886	0.716058	210222	77234	93390.9	2.25099	0.826997	-1.4446	no
NP_999531.1 (+2)	301124	290867	200050	223513	0.00129137	0.715703	328679	211781	253889	1.29458	0.834151	-0.634102	no
XP_020947092.1 (+1)	77397.5	58251.2	45387.3	49667	0.0186896	0.714982	154260	47527.1	57675.7	2.67462	0.82404	-1.69854	no
XP_020932358.1	119778	117313	84695.6	84695.6	7.47406e-06	0.714536	189050	84695.6	101620	1.86036	0.833451	-1.15841	no
XP_020945098.1 (+3)	52864.1	47975.2	40063.5	31651.8	0.0118805	0.71286	69134.9	35857.6	43138.6	1.60262	0.831219	-0.947134	no
XP_020931065.1	241222	221969	176585	152664	0.00358549	0.712057	304525	164624	198110	1.53715	0.830975	-0.887385	no
XP_003483009.1	169391	129267	107204	101421	0.0144148	0.71138	231392	104313	126821	1.82456	0.822519	-1.14943	no
XP_020953475.1 (+1)	61572.6	58251.2	41189.8	43841.2	0.000448146	0.71018	112283	42515.5	51213.7	2.19244	0.830159	-1.40108	no
XP_020923799.1	138545	118129	111757	69272.7	0.0651081	0.709779	186521	90514.6	109426	1.70454	0.827178	-1.04311	no
XP_020920662.1 (+1)	136638	18561.2	25006.2	21321.2	0.422045	0.708746	180176	23163.7	50381.7	3.57623	0.459765	-2.95947	no
XP_020920767.1	62000.8	54728.3	36865.9	45387.3	0.00963883	0.707396	131755	41126.6	49745.6	2.64858	0.826739	-1.67972	no
NP_001098774.1 (+2)	65536	55492.3	43538.4	41476.3	0.00368	0.707307	98761.4	42507.3	51510.7	1.9173	0.825213	-1.21624	no
XP_013841427.1 (+3)	175365	150562	124864	104273	0.00892616	0.707126	222680	114568	138766	1.60471	0.825623	-0.95876	no
NP_001231318.1	180295	176585	143431	108701	0.0137685	0.706566	223833	126066	152253	1.47014	0.828004	-0.828247	no
NP_001274340.1	132902	105728	94629.3	71715.6	0.0277241	0.706242	164335	83172.5	101244	1.62316	0.821508	-0.98246	no
NP_001124202.1 (+1)	108701	63743.9	54728.3	58656.4	0.0708566	0.705461	131871	56692.3	71457.3	1.84545	0.793374	-1.2179	no
XP_020930334.1 (+2)	249728	156956	162491	109457	0.0972484	0.705403	297043	135974	169658	1.75083	0.801458	-1.12734	no
NP_001191322.2 (+1)	76862.9	51418.5	47314.7	39511.9	0.0449142	0.704564	88053.5	43413.3	53777	1.63738	0.807284	-1.02024	no
XP_020918985.1 (+4)	201441	174154	134757	128375	0.0024791	0.70429	268354	131566	159682	1.68056	0.823926	-1.02836	no
NP_001182307.1	71715.6	55109	45703	42055.3	0.0131384	0.704037	83462.6	43879.1	53645.7	1.55581	0.817943	-0.927595	no
XP_020924027.1 (+1)	189259	153726	123145	115698	0.00669577	0.703921	255710	119421	145457	1.75798	0.821009	-1.09844	no
XP_020953478.1	108701	138545	97966.4	72716.7	0.0307146	0.700545	190511	85341.6	104482	1.82338	0.816804	-1.15855	no
XP_003124023.1 (+1)	46987.8	32541.7	26987.4	26801	0.0262963	0.69941	69998.3	26894.2	33329.5	2.10019	0.80692	-1.38002	no
NP_001177118.1	110218	126607	95287.5	68794.2	0.0232216	0.696173	117915	82040.9	100227	1.17648	0.818553	-0.523327	no
XP_020945235.1	114105	124002	96617.7	68794.2	0.0222357	0.6959	143842	82706	100880	1.42588	0.819848	-0.798426	no
XP_005654198.1 (+1)	114898	101421	69754.6	80127	0.00388762	0.69557	171951	74940.8	91550.3	1.87821	0.818575	-1.19817	no
XP_020954098.1 (+8)	134757	95950.3	78478	77397.5	0.0203899	0.695315	176233	77937.7	96645.7	1.8235	0.806428	-1.17709	no
XP_001924224.1 (+1)	124002	87076.8	75804.7	66450.8	0.0270174	0.695222	148493	71127.8	88333.5	1.68105	0.805219	-1.06191	no
XP_020950439.1	191901	139509	116502	107950	0.0184392	0.694624	248953	112226	138965	1.79147	0.807582	-1.14947	no
XP_005659563.2 (+3)	95287.5	66450.8	50012.5	58656.4	0.0298691	0.693939	237728	54334.4	67601.8	3.51659	0.803742	-2.12937	no
XP_003358620.2 (+2)	107950	94629.3	70728.3	68794.2	0.00141659	0.691722	186974	69761.3	85525.4	2.18618	0.815679	-1.42234	no
XP_001926306.1	136638	87076.8	72716.7	74244.7	0.0396206	0.690819	186305	73480.7	92669.1	2.01043	0.792937	-1.34223	no
XP_003360852.1	61572.6	62866.3	42939	42939	5.27073e-06	0.690196	106335	42939	52579.2	2.02238	0.816653	-1.30826	no
XP_003482658.1	66913.1	46341	36611.3	38967.9	0.0243544	0.690113	105612	37789.6	47208.3	2.23715	0.800486	-1.48271	no
XP_020929877.1	150562	94629.3	85284.7	74761.1	0.0459682	0.68857	207221	80022.9	101309	2.04542	0.789887	-1.37268	no
NP_001231306.1	32316.9	22381.2	19215.7	17198.6	0.0258879	0.688448	60256	18207.1	22778.1	2.64535	0.799327	-1.7266	no
XP_020932067.1 (+3)	152664	133826	102837	93326.6	0.00238305	0.687687	214237	98081.8	120663	1.77549	0.812854	-1.12715	no
XP_020921264.1	26432	23493.9	16728.3	17438.6	0.00106369	0.68673	96186.6	17083.5	21023.2	4.57526	0.812599	-2.49324	no
XP_013837554.1 (+1)	131984	132902	100721	80684.3	0.00549445	0.684851	179298	90702.5	111573	1.60701	0.812946	-0.983149	no
XP_005657584.1	152664	163621	114105	102127	0.0011815	0.684481	239139	108116	133129	1.7963	0.812112	-1.14527	no
XP_003129836.2	52498.9	46020.8	35857.8	31216	0.00356173	0.683773	75992.8	33536.9	41398.4	1.83565	0.810102	-1.18011	no
XP_003128149.1	24491.6	15393.1	14562.8	11268.4	0.0552427	0.683199	47985.5	12915.6	16429	2.92078	0.786148	-1.89348	no
XP_020943612.1 (+1)	91405.9	59475.2	57052.4	41189.8	0.0570255	0.681652	144638	49121.1	62280.8	2.32235	0.788704	-1.55803	no
NP_001182280.1 (+2)	126607	114105	95287.5	68319	0.0184577	0.681516	200852	81803.3	101080	1.98707	0.809295	-1.2959	no
XP_003134795.1 (+3)	105728	82952.6	64633.7	62000.8	0.00701967	0.681082	138270	63317.3	78828.8	1.75405	0.803225	-1.12681	no
XP_020944579.1 (+1)	71220.3	48983.2	41189.8	37640.5	0.0232023	0.679047	115366	39415.2	49758.5	2.31853	0.79213	-1.5494	no
XP_020944080.1	123145	114105	85877.9	74761.1	0.00189541	0.678072	183870	80319.5	99472.2	1.84846	0.807457	-1.19486	no
XP_020922164.1	267652	284881	172951	200050	0.00184006	0.67573	308842	186500	231383	1.33476	0.806022	-0.727692	no
XP_013849396.1	145433	158048	104273	100025	0.000374315	0.674345	172235	102149	126945	1.35677	0.804671	-0.753703	down
XP_005673905.1	119778	99334	73731.8	72716.7	0.00294885	0.674244	154898	73224.3	91390.1	1.69491	0.801228	-1.08092	down
XP_020927878.1 (+9)	104273	89524.8	69272.7	60305.4	0.00381038	0.672522	163337	64789.1	80843.9	2.0204	0.80141	-1.33403	down
XP_020955855.1	93326.6	77397.5	55109	58656.4	0.00332642	0.672222	184732	56882.7	71122.4	2.59739	0.799786	-1.69938	down
XP_020934234.1 (+2)	109457	113317	72716.7	76862.9	0.000126237	0.671645	213729	74789.8	93088.2	2.29599	0.803429	-1.51487	down
XP_020933693.1	71715.6	55878.3	46663.3	37380.5	0.0142636	0.668989	144432	42021.9	52909.4	2.7298	0.794223	-1.78118	down
NP_001123683.1	212927	123145	104273	104273	0.0486216	0.668228	242872	104273	136154	1.7838	0.765841	-1.21983	down
XP_020931131.1	124864	139509	86475.3	89524.8	0.000663327	0.667775	326305	88000	110093	2.9639	0.799322	-1.89065	down
XP_003127401.2 (+8)	139509	94629.3	84110.6	65991.8	0.0315152	0.665537	252826	75051.2	96060.2	2.63195	0.781293	-1.7522	down
NP_001230286.1 (+1)	211456	172951	129267	124002	0.00341197	0.665535	279303	126635	159419	1.75201	0.794351	-1.14116	down
NP_001153064.1	69754.6	46987.8	34397.1	40342.1	0.0258824	0.665517	159902	37369.6	47870.4	3.34031	0.780641	-2.09725	down
XP_020942322.1 (+4)	66450.8	46987.8	42939	30152.7	0.0380231	0.66387	117869	36545.8	46632.6	2.52762	0.783697	-1.68941	down
XP_020944821.1 (+6)	179050	106464	87076.8	90147.5	0.0410867	0.663613	210266	88612.1	115684	1.81758	0.765982	-1.24664	down
XP_013845711.1 (+2)	226633	148489	119778	116502	0.0230971	0.658448	294012	118140	152851	1.92352	0.772912	-1.31538	down
XP_020938534.1	91405.9	65083.3	48983.2	51063.3	0.0130283	0.657934	138069	50023.3	64133.9	2.15283	0.779981	-1.46472	down
XP_020919174.1	99334	88292.3	78478	44453.2	0.0499516	0.657469	153309	61465.6	77639.4	1.97463	0.791681	-1.31859	down
XP_001925861.1 (+1)	167059	121450	93975.7	90774.5	0.0107567	0.656776	253534	92375.1	118315	2.14288	0.780757	-1.45661	down
XP_013833699.1	97289.7	82379.6	62432.1	54728.3	0.00336895	0.656611	201562	58580.2	74207.4	2.7162	0.789411	-1.78274	down
XP_020925101.1 (+1)	60724.9	53602	39511.9	34877.3	0.00188301	0.653206	74312.4	37194.6	47179	1.57512	0.788371	-0.998511	down
NP_001230506.1 (+1)	76862.9	70239.7	47975.2	47643.8	0.000252624	0.651335	137588	47809.5	60680.4	2.26742	0.78789	-1.52498	down
XP_005657823.1 (+5)	147464	118129	85284.7	84695.6	0.00339925	0.647909	185366	84990.2	108893	1.70227	0.780491	-1.12501	down
XP_020935527.1	142441	182812	106464	100721	0.00504748	0.646963	180081	103592	133109	1.35288	0.778249	-0.797732	down
XP_003358202.2	193235	208545	139509	119778	0.00155327	0.646283	230876	129643	165267	1.39699	0.784449	-0.832569	down
XP_020923705.1 (+3)	165905	145433	97289.7	102127	0.000841455	0.643294	268742	99708.2	127689	2.10467	0.780869	-1.43044	down
NP_001230566.1	81245.5	59888.9	48308.9	40342.1	0.0121253	0.642852	130229	44325.5	57446.3	2.26696	0.771598	-1.55484	down
XP_005666668.1 (+23)	1.41268e+06	402883	405685	400100	0.181744	0.642611	1.51988e+06	402892	655336	2.31924	0.614787	-1.91549	down
XP_020934354.1	136638	226633	136638	82379.6	0.0730649	0.642325	195702	109509	145572	1.34437	0.752265	-0.837614	down
XP_020938159.1	109457	135694	79023.8	76332	0.00294929	0.641058	145815	77677.9	100127	1.45631	0.775796	-0.908563	down
XP_003126030.2	228210	180295	136638	121450	0.00511468	0.6406	566992	129044	166648	3.40233	0.77435	-2.13547	down
NP_001230773.1	131072	102837	72214.5	74761.1	0.00397441	0.637636	181783	73487.8	95221.1	1.90906	0.771759	-1.30664	down
XP_020953417.1 (+1)	68319	62432.1	44146.1	38967.9	0.00102082	0.636958	81443.8	41557	53466.3	1.52327	0.777257	-0.970711	down
NP_001274342.1	191901	134757	104998	95950.3	0.011733	0.634584	263616	100474	131901	1.99859	0.761736	-1.39162	down
XP_020949580.1	137588	93326.6	77397.5	63743.9	0.0189884	0.634541	154201	70570.7	93014.1	1.65783	0.75871	-1.12767	down
XP_003132117.2	99334	107950	70728.3	60305.4	0.0015379	0.633241	160907	65516.9	84579.4	1.90243	0.77462	-1.29629	down
XP_020929869.1	280959	172951	158048	112534	0.0415261	0.631892	342106	135291	181123	1.88881	0.746956	-1.33838	down
XP_005655758.1 (+5)	185364	208545	132902	114898	0.00169361	0.631266	196173	123900	160427	1.22282	0.772313	-0.662951	down
XP_001927117.4 (+1)	38967.9	27175.1	21321.2	19083	0.012324	0.630916	172794	20202.1	26636.8	6.48704	0.758427	-3.09648	down
NP_001121915.1 (+4)	241222	121450	110218	93326.6	0.0586692	0.629941	307214	101772	141554	2.17029	0.718964	-1.5939	down
XP_003354318.1 (+6)	117313	75804.7	58656.4	56658.3	0.0172347	0.626044	162075	57657.3	77108	2.10192	0.747748	-1.49109	down
XP_020948389.1	125733	75281.1	65991.8	51776.1	0.0341474	0.625258	163373	58884	79695.4	2.04997	0.738863	-1.47222	down
XP_020921985.1	115698	75281.1	52864.1	61147.3	0.0189306	0.624975	201576	57005.7	76247.5	2.6437	0.74764	-1.82214	down
XP_020946470.1	228210	205674	155872	112534	0.00828771	0.620285	246389	134203	175572	1.40335	0.764373	-0.876522	down
NP_001230421.1 (+1)	134757	97966.4	80684.3	59888.9	0.0164058	0.619518	180778	70286.6	93324.1	1.9371	0.753145	-1.3629	down
XP_020918835.1 (+5)	290867	214408	154795	150562	0.00591336	0.618501	365628	152679	202658	1.80416	0.75338	-1.25988	down
NP_001231813.1	152664	118129	88906.4	75281.1	0.00582139	0.616347	249954	82093.8	108745	2.29853	0.75492	-1.60632	down
NP_001177218.1	88906.4	72716.7	45073.8	53231.8	0.00361408	0.614404	238429	49152.8	64982.2	3.66914	0.756404	-2.27821	down
NP_001177088.1 (+2)	869605	677565	485799	450136	0.00358033	0.614399	1.0499e+06	467967	620776	1.69127	0.753842	-1.16577	down
XP_001928582.1	111757	101421	65536	64633.7	0.000194403	0.612055	153233	65084.9	85836.9	1.78516	0.758239	-1.23533	down
XP_003131641.3	44453.2	26249.5	22073.1	18179.2	0.0277493	0.609737	128564	20126.1	27738.7	4.63481	0.725561	-2.67534	down
XP_003354660.2	147464	143431	108701	68319	0.0165192	0.608651	210767	88509.8	116979	1.80176	0.756632	-1.25174	down
XP_001929173.1 (+1)	42642.4	33225.4	22226.6	23170.5	0.00301003	0.607734	98134.7	22698.5	30316.2	3.23704	0.748726	-2.11216	down
XP_005665331.2	184083	123145	98647.9	80684.3	0.0152773	0.607614	237315	89666.1	121640	1.95096	0.737142	-1.40417	down
XP_003123548.1 (+4)	47314.7	122295	43237.6	39511.9	0.0856063	0.60639	95289.8	41374.8	63089.7	1.51039	0.655809	-1.20357	down
XP_003358743.1 (+1)	31651.8	21618.8	20171.1	10960.3	0.0503851	0.605893	86760.8	15565.7	21100.5	4.11179	0.737693	-2.47867	down
NP_001171400.1	341139	267652	185364	177813	0.00270233	0.605374	385901	181588	242992	1.58812	0.747302	-1.08756	down
XP_013845155.2 (+16)	290867	131984	97966.4	121450	0.0630685	0.6042	347134	109708	160567	2.16193	0.683256	-1.66182	down
NP_001152785.1 (+2)	116502	89524.8	60724.9	61147.3	0.00314605	0.601853	186257	60936.1	81974.8	2.27212	0.743351	-1.61193	down
XP_003354637.2	139509	75281.1	65536	52136.3	0.0377145	0.601645	200656	58836.1	83115.6	2.41418	0.707883	-1.76995	down
XP_020953340.1 (+5)	179050	171756	107950	101421	7.24724e-05	0.597087	199221	104685	140044	1.42256	0.747518	-0.928306	down
NP_001254761.1 (+4)	62000.8	36358.4	27364.2	26801	0.0193479	0.590845	149078	27082.6	38131.1	3.90961	0.710249	-2.46063	down
XP_003126496.1	110218	92041.7	63303.6	54728.3	0.00185936	0.588317	135051	59016	80072.9	1.68661	0.737028	-1.19433	down
XP_020952757.1	108701	149522	72214.5	75804.7	0.00474777	0.587916	138853	74009.6	101560	1.3672	0.728724	-0.907777	down
XP_003359029.4	153726	194579	92041.7	109457	0.00359044	0.586581	200067	100749	137451	1.45555	0.732983	-0.989714	down
XP_001924355.2	271388	299044	165905	162491	0.000130708	0.577053	364715	164198	224707	1.62307	0.73072	-1.15133	down
NP_001157984.1	341139	360590	214408	189259	0.000332994	0.575688	359068	201833	276349	1.29933	0.730357	-0.831092	down
XP_020957009.1 (+2)	131072	82952.6	56658.3	60305.4	0.0111182	0.575592	187730	58481.9	82747.1	2.26872	0.706754	-1.6826	down
NP_001020381.1 (+1)	164759	168221	82952.6	104998	0.00146838	0.56451	328380	93975.2	130233	2.52149	0.721595	-1.80502	down
XP_003129498.1	151609	126607	75281.1	79573.5	0.000725977	0.561129	200593	77427.3	108268	1.85275	0.715146	-1.37335	down
XP_020950058.1	115698	110985	64187.3	62432.1	1.34446e-05	0.558818	175587	63309.7	88325.4	1.98795	0.716778	-1.47168	down
NP_001231877.1 (+2)	104998	106464	57052.4	60305.4	1.91801e-05	0.555011	174271	58678.9	82204.8	2.11996	0.713814	-1.57041	down
NP_999393.1	101421	95950.3	50012.5	59064.4	0.000531759	0.553072	269642	54538.4	76612.1	3.51958	0.711877	-2.3057	down
NP_001124208.1	391866	110218	89524.8	100721	0.0893465	0.552893	426025	95122.7	173082	2.4614	0.549581	-2.16308	down
XP_001928370.3	146445	89524.8	70728.3	52136.3	0.0164517	0.552847	226019	61432.3	89708.6	2.51947	0.684798	-1.87937	down
XP_003131452.4	207105	112534	77397.5	82379.6	0.0171778	0.547824	335479	79888.6	119854	2.79907	0.66655	-2.07016	down
XP_003133690.2	156956	139509	74761.1	87076.8	0.000662952	0.547789	212065	80918.9	114576	1.85087	0.706248	-1.38996	down
NP_001193305.1 (+2)	131984	122295	63743.9	74244.7	0.000436659	0.543457	167348	68994.3	98066.7	1.70647	0.703545	-1.2783	down
XP_003356376.2	72214.5	40342.1	25709.3	30362.4	0.0157992	0.541591	214655	28035.8	42157.1	5.09179	0.665033	-2.93668	down
XP_003360127.3 (+1)	236257	174154	104273	110985	0.00234831	0.536783	274956	107629	156417	1.75784	0.688087	-1.35314	down
NP_999420.1	54350.3	49667	28526.2	27175.1	8.78244e-05	0.536589	127573	27850.7	39929.7	3.19494	0.697493	-2.19554	down
XP_001925819.3 (+2)	81245.5	60305.4	45703	28329.2	0.0125064	0.534709	153962	37016.1	53895.8	2.85667	0.686808	-2.05635	down
XP_020930077.1 (+2)	124864	92681.9	53602	59888.9	0.00241296	0.533359	181917	56745.4	82759.2	2.19814	0.685669	-1.6807	down
XP_003358502.1	140479	186653	94629.3	76332	0.00338662	0.533229	263625	85480.7	124523	2.11707	0.686462	-1.62482	down
XP_013833254.2 (+9)	54728.3	35857.8	23010.4	22851.5	0.00511512	0.529246	82667.5	22931	34112	2.42341	0.672225	-1.85002	down
XP_020946208.1	84110.6	113317	50710.6	51063.3	0.00184242	0.527035	181400	50887	74800.3	2.42513	0.680304	-1.83381	down
XP_003484147.1	736334	327242	241222	236257	0.0272562	0.526889	764467	238740	385264	1.98427	0.619678	-1.67902	down
NP_999269.1	175365	97966.4	64187.3	66913.1	0.0112662	0.521451	284821	65550.2	101108	2.81701	0.648319	-2.11939	down
XP_005653106.2	130167	119778	62866.3	66450.8	6.57348e-05	0.518279	155876	64658.6	94815.4	1.64399	0.681942	-1.26948	down
XP_020932339.1 (+1)	221969	138545	98647.9	76332	0.00849589	0.512821	240148	87489.9	133874	1.79384	0.653526	-1.45674	down
XP_020943791.1 (+1)	263967	336442	165905	136638	0.00175972	0.511345	394134	151272	225738	1.74598	0.67012	-1.38154	down
NP_001185849.1 (+1)	128375	68319	53231.8	37122.3	0.0180567	0.506591	358172	45177.1	71761.9	4.99111	0.629541	-2.98699	down
XP_020955047.1	141457	159147	93975.7	55492.3	0.00715804	0.498954	256355	74734	112518	2.27835	0.664197	-1.77831	down
XP_020920341.1	623487	256749	218913	139509	0.0340697	0.492717	706440	179211	309665	2.28131	0.578727	-1.97891	down
XP_020940719.1	126607	110218	55109	59475.2	0.000176349	0.486163	207853	57292.1	87852.3	2.36593	0.652141	-1.85915	down
XP_013850908.1	103552	70728.3	39239	42347.8	0.00243453	0.485351	210756	40793.4	63966.8	3.29477	0.637727	-2.36917	down
NP_001231868.1	228210	284881	143431	100025	0.00299657	0.48035	390701	121728	189137	2.0657	0.643598	-1.6824	down
XP_003123221.1 (+5)	82379.6	77397.5	44762.4	31216	0.00182928	0.47599	250601	37989.2	58938.9	4.25187	0.644553	-2.72173	down
NP_008637.1 (+5)	169391	146445	73731.8	74761.1	0.00011819	0.472653	240120	74246.5	116082	2.06853	0.639602	-1.69336	down
NP_999001.1	135694	145433	60305.4	72214.5	0.000268746	0.471953	392443	66259.9	103412	3.79495	0.640738	-2.56628	down
XP_020924169.1 (+5)	127488	114105	53602	59475.2	0.000128385	0.46949	175463	56538.6	88667.5	1.97889	0.637648	-1.63386	down
NP_999572.1	159147	246290	100025	81245.5	0.00380697	0.468754	207792	90635.2	146677	1.41666	0.617924	-1.197	down
NP_001172069.1	85877.9	55878.3	31216	32093.6	0.00263197	0.46755	111233	31654.8	51266.5	2.16971	0.617457	-1.81309	down
XP_003481553.2 (+1)	767603	194579	129267	159147	0.046207	0.464495	974707	144207	312649	3.11758	0.461243	-2.75683	down
NP_999012.2 (+1)	83529.6	56266.9	30573.6	31872	0.00201681	0.464349	140979	31222.8	50560.5	2.78832	0.617533	-2.17481	down
NP_001171391.1	301124	218913	126607	103552	0.00156911	0.453927	431291	115080	187549	2.29961	0.613597	-1.90603	down
XP_003129480.1	55878.3	51418.5	28724.6	19619.5	0.00164932	0.451344	136005	24172.1	38910.2	3.49536	0.621226	-2.49225	down
NP_001231536.1	100025	36358.4	27746.2	18690.3	0.0221643	0.435359	272975	23218.2	45704.9	5.97256	0.508002	-3.55544	down
NP_001001866.1	311744	260333	106464	131072	0.000406626	0.418597	351807	118768	202403	1.73815	0.586788	-1.56664	down
XP_020940768.1	641016	459594	201441	246290	0.00111712	0.418165	657977	223866	387085	1.69983	0.578337	-1.5554	down
XP_005657864.1	185364	229797	99334	72214.5	0.00108224	0.417998	332827	85774.2	146677	2.26911	0.584782	-1.95616	down
XP_020949517.1	311744	165905	81810.6	94629.3	0.00406404	0.407369	492039	88220	163522	3.009	0.539499	-2.47959	down
XP_020942754.1 (+2)	299044	162491	89524.8	81810.6	0.00350334	0.406843	391726	85667.7	158218	2.47587	0.541455	-2.19302	down
XP_020932966.1 (+1)	137588	214408	79023.8	57052.4	0.00266502	0.405917	271415	68038.1	122018	2.22438	0.557606	-1.99608	down
XP_020937375.1 (+1)	194579	324982	109457	87682.4	0.00268627	0.404942	339008	98569.5	179175	1.89205	0.55013	-1.78211	down
NP_001231311.1 (+4)	531607	336442	180295	148489	0.00178378	0.398928	575753	164392	299208	1.92425	0.549424	-1.80831	down
XP_020942857.1 (+9)	208545	141457	68794.2	62432.1	0.000835835	0.389231	221400	65613.2	120307	1.84029	0.545381	-1.7546	down
XP_020936855.1	1.12384e+06	513498	322737	218913	0.00730146	0.384197	1.27336e+06	270825	544746	2.33753	0.497159	-2.2332	down
XP_003134755.1	134757	95950.3	47314.7	38698.8	0.000763153	0.383681	300662	43006.7	79180.2	3.79719	0.54315	-2.80551	down
XP_020957794.1 (+1)	145433	97289.7	47643.8	41476.3	0.000918893	0.382204	202883	44560	82960.8	2.44552	0.537121	-2.18682	down
XP_020944082.1 (+1)	85877.9	50710.6	23170.5	25531.7	0.00175049	0.381876	150512	24351.1	46322.7	3.2492	0.525684	-2.62782	down
XP_020924524.1 (+3)	614903	414209	200050	174154	0.000833462	0.377993	629068	187102	350829	1.79309	0.533313	-1.74939	down
NP_001254623.2 (+2)	116502	114898	42347.8	45073.8	3.09593e-06	0.377811	137530	43710.8	79705.6	1.72548	0.548403	-1.65369	down
XP_020954291.1	223513	260333	91405.9	90147.5	4.20804e-05	0.377415	223513	90776.7	166350	1.34363	0.545697	-1.29997	down
XP_020939190.1	161369	160254	58656.4	60724.9	4.81599e-07	0.371189	161369	59690.6	110251	1.46365	0.541407	-1.43478	down
NP_999534.1 (+1)	201441	345901	108701	77397.5	0.00246278	0.365461	201441	93049.1	183360	1.09861	0.507466	-1.1143	down
XP_003481293.2	137588	80127	35364.2	37902.4	0.00142066	0.361721	137588	36633.3	72745.5	1.89137	0.503581	-1.90913	down
XP_013841619.1 (+10)	61572.6	33923.6	19619.5	11425.7	0.00424372	0.35484	61572.6	15522.6	31635.3	1.94632	0.490673	-1.98792	down
XP_001927323.2	368167	294927	117313	108701	9.87375e-05	0.345056	368167	113007	222277	1.65634	0.508405	-1.70395	down
XP_003483228.1	425854	360590	142441	114898	0.000125232	0.329487	425854	128669	260946	1.63196	0.493089	-1.72669	down
NP_001038012.1	181549	185364	67847.1	52864.1	9.62963e-05	0.329027	181549	60355.6	121906	1.48925	0.495099	-1.5888	down
XP_003484066.1	370728	267652	97289.7	106464	0.000230347	0.327716	370728	101877	210533	1.7609	0.483898	-1.86354	down
XP_020936201.1	207105	288858	82952.6	74761.1	0.000249701	0.326877	207105	78856.9	163419	1.26732	0.482544	-1.39305	down
XP_005664843.1 (+1)	231395	88292.3	50710.6	27554.5	0.00574316	0.306166	231395	39132.6	99488.2	2.32586	0.393339	-2.56392	down
XP_020929347.1	73222.5	25709.3	14664.1	7434.4	0.00590662	0.290338	73222.5	11049.2	30257.6	2.41997	0.365173	-2.72834	down
XP_020920974.1 (+3)	400100	299044	103552	92681.9	0.000102099	0.286667	400100	98117.1	223845	1.7874	0.438327	-2.02778	down
NP_001107172.1	581734	331810	122295	102127	0.000477843	0.265533	581734	112211	284491	2.04482	0.394425	-2.37415	down
XP_003353925.2	154795	114898	37380.5	31216	9.59404e-05	0.260041	154795	34298.3	84572.5	1.83032	0.405549	-2.17415	down
XP_003134843.2 (+3)	535304	129267	43841.2	34636.4	0.00127215	0.188425	535304	39238.8	185762	2.88166	0.211231	-3.77001	down
XP_020941591.1 (+5)	58656.4	28329.2	14263.1	11.7942	0.0065795	0.186815	58656.4	7137.45	25315.1	2.31705	0.281944	-3.03881	down
NP_008638.1 (+1)	41189.8	42055.3	6700.25	7643.41	1.12999e-06	0.172325	41189.8	7171.83	24397.2	1.6883	0.293961	-2.52187	down
